# Supplementary material
Source: PubMed Central journal article supplement (PMC4550221)

# Supporting Information

## Evaluation of spiroperidine hydantoins as a novel class of antimalarial agents

Marvin J. Meyers,<sup>a,\*</sup> Elizabeth J. Anderson,<sup>a</sup> Sarah A. McNitt,<sup>a</sup> Thomas M. Krenning,<sup>a</sup> Megh Singh,<sup>a</sup> Jing Xu,<sup>b</sup> Wentian Zeng,<sup>b</sup> Limei Qin,<sup>c</sup> Wanwan Xu,<sup>c</sup> Siting Zhao,<sup>c</sup> Li Qin,<sup>c</sup> Christopher S. Eickhoff,<sup>a</sup> Jonathan Oliva,<sup>a</sup> Mary A. Campbell,<sup>a</sup> Stacy D. Arnett,<sup>a</sup> Michael J. Prinsen,<sup>a</sup> David W. Griggs,<sup>a</sup> Peter G. Ruminski,<sup>a</sup> Daniel E. Goldberg,<sup>d</sup> Ke Ding,<sup>e</sup> Xiaorong Liu,<sup>b</sup> Zhengchao Tu,<sup>b</sup> Micky D. Tortorella,<sup>b</sup> Francis M. Sverdrup,<sup>a</sup> and Xiaoping Chen,<sup>c,\*</sup>

<sup>a</sup> Center for World Health and Medicine, Saint Louis University School of Medicine, Saint Louis, MO, USA

<sup>b</sup> Drug Discovery Pipeline at the Guangzhou Institutes for Biomedicine and Health, Chinese Academy of Sciences, Guangzhou, China

<sup>c</sup> Laboratory of Pathogen Biology, State Key Laboratory of Respiratory Disease, Center for Infection and Immunity, Guangzhou Institutes of Biomedicine and Health, Chinese Academy of Sciences, Guangzhou, China

<sup>d</sup> Departments of Medicine and Molecular Microbiology, Washington University in St. Louis, Saint Louis, MO, USA

<sup>e</sup> Key Laboratory of Regenerative Biology, Institute of Chemical Biology, Guangzhou Institutes of Biomedicine and Health, Chinese Academy of Sciences, Guangzhou, China

### Corresponding Authors

\* E-mail: [mmeyers8@slu.edu](mailto:mmeyers8@slu.edu). 1402 South Grand Blvd, M132 Schwitalla Hall, Saint Louis, MO 63104. Phone: 1-314-977-5197; and Email: [chen\\_xiaoping@gibh.ac.cn](mailto:chen_xiaoping@gibh.ac.cn). #190, Kaiyuan Avenue, Guangzhou Science Park, Guangzhou 510530, China

## Table of Contents

|                                                                       |     |
|-----------------------------------------------------------------------|-----|
| Synthesis and Characterization of Compounds                           | S2  |
| Biological Assays                                                     | S18 |
| <sup>1</sup> H NMR and LC-MS Spectra of Compound <b>4e</b> (CHWM-123) | S21 |
| <sup>1</sup> H NMR Spectra of New Compounds                           | S22 |

**General Synthesis Methods.** Commercially available reagents and solvents were used without further purification unless stated otherwise. LC-MS analyses were performed on an Agilent 1100 or 1200HPLC/MSD electrospray mass spectrometer in positive ion mode with scan range was 100-1000d. Preparative normal phase chromatography was performed on a Biotage SP1 with prepacked Biotage or Varian silica gel cartridges. Preparative reverse phase HPLC was performed on a Shimadzu LC-20AP or Biotage SP1 equipped with a C18 column and a methanol/water or acetonitrile/water/0.05% TFA gradient. The purity of tested compounds was  $\geq 95\%$  as determined by HPLC analysis (at 210 nm as absorbance at 254 nm is very poor for these compounds) conducted on an Agilent 1100 or 1260 system using a reverse phase C18 column with diode array detector unless stated otherwise. NMR spectra were recorded on a Bruker 400 MHz spectrometer. The signal of the deuterated solvent was used as internal reference. Chemical shifts ( $\delta$ ) are given in ppm and are referenced to residual not fully deuterated solvent signal. Coupling constants (J) are given in Hz.

Compounds **4a-g** and **11c-d** were purchased from ChemBridge ([www.hit2lead.com](http://www.hit2lead.com)). Compounds **4d** and **4e** were resynthesized as described herein.

**3-ethyl-8-[(2-hydroxyphenyl)methyl]-1-(3-methylbutyl)-1,3,8-triazaspiro[4.5]decane-2,4-dione hydrochloride (4d).** A mixture of **12n** (0.15 mmol) and 2-hydroxybenzaldehyde (0.20 mmol) was dissolved in DMF (1 mL) and was stirred at room temp for 30 minutes before the addition of sodium triacetoxyborohydride (0.20 mmol). The reaction stirred at room temp for 24h. A work up of ethyl acetate and saturated bicarbonate solution was performed. The organic layer was dried and condensed, then purified by reverse phase HPLC (10% to 60% acetonitrile/water/0.05% TFA). The isolated compound was then treated with 2M HCl in diethyl ether and 41.0 mg (35% yield overall) of the HCl salt was obtained (>95% purity). White Solid, 40mg, 0.100 mmol, 35% yield, HPLC purity >95%,  $^1\text{H}$  NMR (400 MHz, DMSO- $d_6$ )  $\delta$  ppm 10.21 (s, 1 H), 7.45 (d, J=6.6 Hz, 1 H), 7.24 (t, J=1.0 Hz, 1 H), 6.93 (d, J=7.8 Hz, 1 H), 6.83 (t, J=7.5 Hz, 1H), 4.21 (br. s., 2 H), 3.34 - 3.44 (m, 4 H), 3.31 (d, J=7.1 Hz, 2 H), 3.12 (t, J=1.0 Hz, 2 H), 2.46 - 2.52 (m, 2 H), 1.87 (d, J=13.9 Hz, 2 H), 1.49 (dt, J=13.2, 6.6 Hz, 1 H), 1.32 - 1.42 (m, 2 H), 1.02 (t, J=7.2 Hz, 3 H), 0.85 - 0.85 (m, 1 H), 0.86 (d, J=1.0 Hz, 6 H). ES-MS m/z 375.4 [M+H] $^+$ .

**8-(5-chloro-2-hydroxybenzyl)-3-ethyl-1,3,8-triazaspiro[4.5]decane-2,4-dione hydrochloride (10a).** A mixture of 3-ethyl-1,3,8-triazaspiro[4.5]decane-2,4-dione (0.26 mmol) and 5-chlorosalicylaldehyde (0.45 mmol) was dissolved in DMF and stirred at room temp for 30 minutes before the addition of sodium triacetoxyborohydride (0.51 mmol). The reaction stirred at room temp under positive nitrogen pressure for 4 hours. The reaction was then quenched with water and the product was extracted with ethyl acetate and saturated sodium bicarbonate. The organic layer was washed twice and condensed yielding a white solid. The product was then purified via reverse phase HPLC (0-60% acetonitrile/water/0.05%TFA). The TFA salt was then treated with HCl in ether and filtered yielding 42 mg final compound as an HCl salt. White solid, 42 mg. HPLC >95% pure. ES-MS m/z 338 (MH $^+$ ).  $^1\text{H}$  NMR (400 MHz, DMSO- $d_6$ )  $\delta$  ppm 1.07 (t, J=7.09 Hz, 3 H) 1.84 (q, J=14.70 Hz, 2 H) 2.12 (t, J=1.00 Hz, 2 H) 3.18 (br. q, J=11.00, 11.00, 11.00 Hz, 2 H) 3.38 (t, J=1.00 Hz, 2 H) 3.47 (br. q, J=11.50, 11.50, 11.50 Hz, 2 H) 4.19 (br. d, J=1.00 Hz, 2 H) 6.97 (d, J=8.56 Hz, 1 H) 7.34 (d, J=2.69 Hz, 1 H) 7.36 (d, J=2.69 Hz, 1 H) 7.48 (br. q, J=2.70, 2.70, 2.70 Hz, 1 H) 8.97 (s, 1 H).

**8-[(5-chloro-2-hydroxyphenyl)methyl]-1,3-diethyl-1,3,8-triazaspiro[4.5]decane-2,4-dione trifluoroacetate (10b).** A mixture of 1,3-diethyl-1,3,8-triazaspiro[4.5]decane-2,4-dione (0.15 mmol) and 5-chloro-2-hydroxybenzaldehyde (0.20 mmol) was dissolved in DMF (2 mL) and was stirred at room temp for 30 minutes before the addition of sodium triacetoxyborohydride (0.20 mmol). The reaction stirred under positive nitrogen pressure at room temp for 24h. The mixture was quenched with water and purified via reverse phase (0-75% acetonitrile/water/0.05%TFA). The isolated fractions were concentrated and dissolved in ether and some precipitate formed yielding 8.2 mg of product. White powder, 8.2 mg, 0.017 mmol, 12% yield, HPLC purity > 95%. <sup>1</sup>H NMR (400 MHz, DMSO-d<sub>6</sub>) δ ppm 9.51 (br. s., 1 H), 7.54 (br. s., 1 H), 7.37 (dd, J=8.7, 2.3 Hz, 1 H), 6.99 (d, J=8.6 Hz, 1 H), 4.30 (br. s., 2 H), 3.46 (br. s., 4 H), 3.40 (q, J=7.3 Hz, 4 H), 2.26 (br. s., 2 H), 1.98 (d, J=14.7 Hz, 2 H), 1.04 - 1.18 (m, 6 H).

**Synthesis of 8-(5-chloro-2-hydroxybenzyl)-1-cyclopentyl-3-ethyl-1,3,8-triazaspiro[4.5]decane-2,4-dione (10c).** See Scheme 2.

**ethyl 4-cyano-4-(cyclopentylamino)piperidine-1-carboxylate (14a).** A solution of cyclopentylamine hydrochloride (20 mmol) in MeOH (4 mL) and water (4 mL) was treated with ethyl 4-oxopiperidine-1-carboxylate (**13**) (3.02 mL, 20 mmol) at room temp. After 5 min, the reaction was cooled to 0 °C and treated with a solution of potassium cyanide (1.3 g, 20 mmol) in water (2 mL). The mixture was allowed to warm to room temp overnight. The mixture was diluted with water and extracted with diethyl ether. The organic layers were washed with brine, dried over sodium sulfate, filtered and concentrated to give the title compound as a thick oil (4.57 g, 17.2 mmol, 86% yield). ES-MS m/z 266 [M+H]<sup>+</sup>, 239 [M-CN]<sup>+</sup>.

**ethyl 1-cyclopentyl-2,4-dioxo-1,3,8-triazaspiro[4.5]decane-8-carboxylate (15a).** A solution of **14a** (4.55 g, 17.1 mmol) in AcOH (18 mL) was treated with potassium cyanate (2.78 g, 34.3 mmol) in water (6 mL) dropwise. Caution: an exotherm develops near the end of the addition with gas evolution. After the exotherm and evolution of gas subsided (15 min), the reaction was warmed to 50 °C for 1 h. The reaction was poured into water and extracted with diethyl ether. The organic layers were washed with 1N HCl, satd sodium bicarbonate and brine, dried over sodium sulfate, and concentrated to give the urea intermediate as a thick viscous oil (3.51 g). The thick oil was treated with 10% aq. HCl and stirred at 50 °C for 2 h. Upon cooling to room temp, the mixture was extracted with ethyl acetate. The organic layer was washed with 10% HCl and brine, dried over sodium sulfate and concentrated to give an oil which slowly solidified on standing. The title compound was obtained as an impure oily waxy solid (2.71 g, 8.76 mmol, 51% yield). ES-MS m/z 310 [M+H]<sup>+</sup>.

**ethyl 1-cyclopentyl-3-ethyl-2,4-dioxo-1,3,8-triazaspiro[4.5]decane-8-carboxylate (16a).** A solution of **15a** (2.00 g, 6.48 mmol) in DMF was cooled to 0 °C and treated with sodium hydride (60% dispersion in mineral oil, 520 mg, 13.0 mmol) under nitrogen. After 15 min, the mixture was treated with ethyl iodide (1.05 mL, 13.0 mmol) dropwise. The thick mixture was allowed to warm to room temp overnight. The mixture was quenched with satd ammonium chloride and extracted with ethyl acetate. The organic layers were washed with satd ammonium chloride, dried over sodium sulfate and concentrated to give an oil (2.5 g). The oil was purified by silica gel chromatography (20 to 50% ethyl acetate/heptane) to give the title compound as a clear oil (373 mg, 1.11 mmol, 17%). ES-MS m/z 338 [M+H]<sup>+</sup>.

**1-cyclopentyl-3-ethyl-1,3,8-triazaspiro[4.5]decane-2,4-dione hydrochloride (17a).** A solution of **16a** (373 mg, 1.11 mmol) in ethanol (12 mL) was treated with KOH (560 mg) and

refluxed for 2 d. The mixture was concentrated and the resulting residue was diluted with 1 N NaOH and extracted with DCM. The organic extracts were dried over magnesium sulfate, filtered and concentrated to give the crude amine as a yellow solid which was converted to the HCl salt with 1N HCl in diethyl ether to give the title compound as a yellow foam (162 mg, 0.537 mmol, 48%) HPLC purity >90%, ES-MS m/z 266 [M+H]<sup>+</sup>.

**8-(5-chloro-2-hydroxybenzyl)-1-cyclopentyl-3-ethyl-1,3,8-triazaspiro[4.5]decane-2,4-dione (10c).** A mixture of **17a** (50.0 mg, 0.166 mmol) and 5-chloro-2-hydroxybenzaldehyde (33.0 mg, 0.211 mmol) was dissolved in DCE (500 uL) and DMF (500 uL) at room temp. Sodium triacetoxyborohydride (88.8 mg, 0.419 mmol) was added. The solution immediately turned a deep wine color that dissipated within minutes. The reaction was stirred at room temp overnight (20 h). The reaction was quenched with a few drops of water. After 15 min, a couple drops of TFA was added. The solution was concentrated to remove the DCE and then purified by reverse phase HPLC (10 to 70% acetonitrile/water/0.05%TFA). The combined fractions were concentrated to remove the acetonitrile. The aqueous solution was neutralized with satd sodium bicarbonate. The resultant precipitate was filtered and washed with water to give the product as a white solid: 14.5 mg, 0.0357 mmol, 22% yield. HPLC ~90% pure. <sup>1</sup>H NMR (400 MHz, DMSO-d<sub>6</sub>) δ 7.19 (dd, J = 2.32, 8.47 Hz, 1H), 7.04 (d, J = 2.01 Hz, 1H), 6.84 (d, J = 8.34 Hz, 1H), 3.87 (s, 2H), 3.41 - 3.56 (m, 4H), 3.01 - 3.21 (m, 2H), 2.05 - 2.21 (m, 2H), 1.85 - 1.97 (m, 3H), 1.75 (d, 5H), 1.51 - 1.64 (m, 3H), 1.20 (t, J = 7.18 Hz, 3H). ES-MS m/z 406.1 (M+H).

**Synthesis of 8-(5-chloro-2-hydroxybenzyl)-3-ethyl-1-phenyl-1,3,8-triazaspiro[4.5]decane-2,4-dione (10d).**

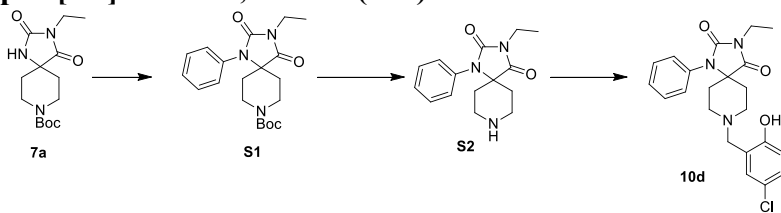

**tert-butyl 3-ethyl-2,4-dioxo-1-phenyl-1,3,8-triazaspiro[4.5]decane-8-carboxylate (S1).** *tert*-Butyl 3-ethyl-2,4-dioxo-1,3,8-triazaspiro[4.5]decane-8-carboxylate (**7a**) (1g, 3.36mmol), iodobenzene (2.06g, 10mmol), cuprous iodide (0.64g, 3.36mmol), 2,2,6,6-tetramethyl-3,5-heptanedione (0.62g, 3.36mmol) and cesium carbonate (5.5g, 16.88mmol) were dissolved in acetonitrile and DMF (v/v 1:1) under argon atmosphere. The reaction was heated to 110°C overnight. The mixture was extracted with ethyl acetate. The combined organic phases were dried over sodium sulphate and concentrated in vacuo. The title compound was used without further purification.

**3-ethyl-1-phenyl-1,3,8-triazaspiro[4.5]decane-2,4-dione (S2).** **S1** was dissolved in DCM (20ml) and TFA (20ml) and stirred at room temperature overnight. The mixture was neutralized by Na<sub>2</sub>CO<sub>3</sub> and extracted with dichloromethane. The combined organic phases were dried over sodium sulphate and concentrated in vacuo. The title compound was used without further purification.

**8-(5-chloro-2-hydroxybenzyl)-3-ethyl-1-phenyl-1,3,8-triazaspiro[4.5]decane-2,4-dione (10d).** **S2** (0.47g, 1.72mmol) and 5-Chlorosalicylaldehyde (0.8g, 5.1mmol) were dissolved in ethanol and refluxed overnight. The reaction was cooled to room temperature and sodium cyanoborohydride (0.33g, 5.25mmol) was added. The mixture was stirred overnight. The mixture was concentrated in vacuo and extracted with dichloromethane. The combined organic

phases were dried over sodium sulphate and concentrated in vacuo. The residue was purified by HPLC to give the title compound as a solid (0.18g, 25%yield three steps). HPLC >98% pure. ES-MS  $m/z$  414 ( $MH^+$ ).  $^1H$  NMR (400 MHz,  $CDCl_3$ )  $\delta$  7.47-7.45 (m, 3H), 7.16-7.14 (m, 2H), 7.08 (d,  $J=8.4$ , 1H), 6.94 (s, 1H), 6.66 (d,  $J=8.8$ Hz, 1H), 3.70 (s, 2H), 3.64 (q,  $J=7.2$ Hz, 2H), 3.04-2.98 (m, 2H), 2.85-2.82 (m, 2H), 1.93-1.92 (m, 4H), 1.27 (t,  $J=7.2$ Hz, 3H).

**Synthesis of 1-benzyl-8-(5-chloro-2-hydroxybenzyl)-3-ethyl-1,3,8-triazaspiro[4.5]decane-2,4-dione (10e).**

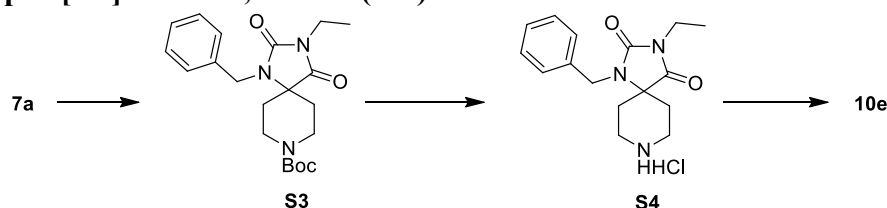

**tert-butyl 1-benzyl-3-ethyl-2,4-dioxo-1,3,8-triazaspiro[4.5]decane-8-carboxylate (S3).** To a solution of 7a (1.0g, 3.36mmol) in dry THF was add potassium tert-butoxide (1.5g, 13.4mmol) and stirred for 30min, then benzyl bromide (0.6g, 3.5mmol) was added. The reaction was stirred at 50°C overnight. The mixture was extracted with ethyl acetate. The combined organic phases were dried over sodium sulphate and concentrated in vacuo. The residue was purified over a silica column to give the title compound (0.9g, 77%yield).

**1-benzyl-3-ethyl-1,3,8-triazaspiro[4.5]decane-2,4-dione hydrochloride (S4).** S3 (0.9g, 2.32mmol) was dissolved in 18ml of HCl solution in THF (2mol/L) and stirred at room temperature overnight. The mixture was concentrated in vacuo and crystallized to give the title compound as a solid (0.47g, 63%yield).

**1-benzyl-8-(5-chloro-2-hydroxybenzyl)-3-ethyl-1,3,8-triazaspiro[4.5]decane-2,4-dione (10e).** S4 (0.31g, 1.08mmol) and 5-chlorosalicylaldehyde (0.58g, 3.69mmol) were dissolved in ethanol and refluxed overnight. The reaction was cooled to room temperature and sodium cyanoborohydride (0.4g, 6.35mmol) was added. The mixture was stirred overnight. The mixture was concentrated in vacuo and extracted with dichloromethane. The combined organic phases were dried over sodium sulphate and concentrated in vacuo. The residue of 18 was used purified by HPLC to give the title compound as a solid (0.24g, 52%yield). HPLC >98% pure. ES-MS  $m/z$  428 ( $MH^+$ ).  $^1H$  NMR (400 MHz,  $CDCl_3$ )  $\delta$  7.35-7.26 (m, 5H), 7.11 (dd,  $J=8.8$ , 2.0Hz, 1H), 6.94 (s, 1H), 6.73 (d,  $J=8.4$ Hz, 1H), 4.53 (s, 2H), 3.72 (s, 2H), 3.61 (q,  $J=7.2$ Hz, 2H), 2.94 (t,  $J=11.6$ Hz, 2H), 2.83-2.80 (m, 2H), 1.98-1.90 (m, 2H), 1.63-1.59 (m, 2H), 1.24 (t,  $J=7.2$ Hz, 3H).

**Synthesis of 8-(5-chloro-2-hydroxybenzyl)-3-ethyl-1-phenethyl-1,3,8-triazaspiro[4.5]decane-2,4-dione (10f).** See Scheme 2.

**ethyl 4-cyano-4-(phenethylamino)piperidine-1-carboxylate hydrochloride (14b).** A solution of isopentylamine hydrochloride (10 mmol) in MeOH (2 mL) and water (2 mL) was treated with ethyl 4-oxopiperidine-1-carboxylate (1.51 mL, 10 mmol) at room temp. After 5 min, the reaction was cooled to 0 °C and treated with a solution of potassium cyanide (651 mg, 10 mmol) in water (1.0 mL). The mixture was allowed to warm to room temp overnight. The mixture was diluted with water and extracted with diethyl ether. The organic layers were washed with brine, dried over sodium sulfate, filtered and concentrated to give the crude compound as a clear oil which was purified by silica gel chromatography (30 to 70% EtOAc/heptane). The resultant oil was dissolved in diethyl ether and treated with 9 mL of 1 N HCl in diethyl ether.

The mixture was concentrated and recrystallized from methanol/diethyl ether to give the title compound as a white HCl salt (1.06 g, 3.14 mmol, 31%).

**ethyl 2,4-dioxo-1-phenethyl-1,3,8-triazaspiro[4.5]decane-8-carboxylate (15b).** A solution of **14b** (500 mg, 1.48 mmol) in AcOH (1.5 mL) was treated with potassium cyanate (240 mg, 2.96 mmol) in water (0.5 mL) and the reaction was warmed to 50 °C for 1 h. The reaction was poured into water and extracted with ethyl acetate. The organic layers were washed with satd ammonium chloride and brine, dried over sodium sulfate, and concentrated to give the urea intermediate as a viscous semi-solid oil (510 mg). The intermediate was treated with 10% aq. HCl (3 mL) and stirred at 50 °C for 1 h. Upon cooling to room temp, the ppt was filtered, washed with cold water, and dried to give the title compound as a white solid (312 mg, 0.904 mmol, 61% yield). HPLC purity >90%.

**ethyl 3-ethyl-2,4-dioxo-1-phenethyl-1,3,8-triazaspiro[4.5]decane-8-carboxylate (16b).** A solution of **15b** (300 mg, 0.869 mmol) in DMF was cooled to 0 °C and treated with sodium hydride (60% dispersion in mineral oil, 104 mg, 2.61 mmol) under nitrogen. After 15 min, the mixture was treated with ethyl iodide (0.210 mL, 2.61 mmol) dropwise. The mixture was allowed to warm to room temp overnight. The mixture was quenched with satd ammonium chloride and extracted with ethyl acetate. The organic layers were washed with satd ammonium chloride, dried over sodium sulfate and concentrated. The oil was purified by silica gel chromatography (20 to 60% ethyl acetate/heptane) to give the title compound as a clear viscous oil (251 mg, 0.672 mmol, 77%). HPLC purity ~95%.

**3-ethyl-1-phenethyl-1,3,8-triazaspiro[4.5]decane-2,4-dione hydrochloride (17b).** A solution of **16b** (251 mg, 0.672 mmol) in ethanol (8 mL) was treated with 2.5 N NaOH (2 mL, 5 mmol) and stirred at 80 °C for 42 h. The mixture was concentrated and the resulting residue was diluted with 1 N NaOH and extracted with DCM. The organic extracts were dried over magnesium sulfate, filtered and concentrated to give the crude product as a 3:1 mixture of product and starting material. The mixture was diluted with diethyl ether and treated with 1N HCl in diethyl ether (1 mL) to give the title compound as a white solid (135 mg, 0.398 mmol, 59%) HPLC purity >95%.

**8-(5-chloro-2-hydroxybenzyl)-3-ethyl-1-phenethyl-1,3,8-triazaspiro[4.5]decane-2,4-dione (10f).** A mixture of **17b** (121 mg, 0.357 mmol) and 5-chloro-2-hydroxybenzaldehyde (56 mg, 0.357 mmol) was suspended in DCE (1.2 mL) and DMF (1.0 mL) at room temp. Sodium triacetoxyborohydride (113 mg, 0.536 mmol) was added. The reaction was stirred at room temp for 2 h. The reaction was quenched with satd sodium bicarbonate and extracted with ethyl acetate. The organic layer was washed with satd sodium bicarbonate, dried over sodium sulfate and concentrated to give the crude product as an oil. The oil was purified by silica gel chromatography (20 to 50% ethyl acetate/heptane). The resultant clear oil was triturated with diethyl ether to give the title compound as a white solid: 59.7 mg, 0.135 mmol, 38% yield. HPLC >98% pure. ES-MS  $m/z$  442 ( $MH^+$ ).  $^1H$  NMR (400 MHz, DMSO- $d_6$ )  $\delta$  7.18 - 7.37 (m, 6H), 7.12 (dd,  $J$  = 2.76, 8.60 Hz, 1H), 6.76 (d,  $J$  = 8.60 Hz, 1H), 3.62 (s, 2H), 3.35 - 3.44 (m, 4H), 2.85 - 2.92 (m, 2H), 2.66 - 2.77 (m, 4H), 1.79 - 1.95 (m, 2H), 1.45 - 1.52 (m, 2H), 1.09 (t,  $J$  = 7.18 Hz, 3H).

**Synthesis of 8-(5-chloro-2-hydroxybenzyl)-3-ethyl-1-(4-methoxybenzyl)-1,3,8-triazaspiro[4.5]decane-2,4-dione (10g).**

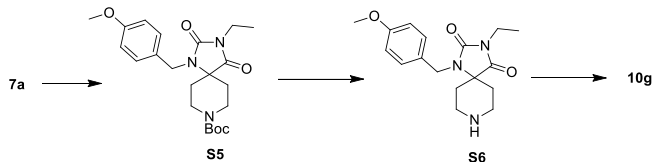

**tert-butyl 3-ethyl-1-(4-methoxybenzyl)-2,4-dioxo-1,3,8-triazaspiro[4.5]decane-8-carboxylate (S5).** To a solution of *tert*-butyl 3-ethyl-2,4-dioxo-1,3,8-triazaspiro[4.5]decane-8-carboxylate (**7a**) (1 g, 3.36 mmol) in dry DMF was added sodium hydride (0.12g, 5mmol) and stirred for 30min, then 4-methoxybenzylchloride (0.53g, 3.38mmol) was added. The reaction was stirred at room temperature overnight. The mixture was extracted with ethyl acetate. The combined organic phases were washed with brine, dried over sodium sulphate and concentrated in vacuo. The title compound was used without further purification.

**3-ethyl-1-(4-methoxybenzyl)-1,3,8-triazaspiro[4.5]decane-2,4-dione (S6).** **S5** was dissolved in DCM (7.5ml) and TFA (2.5 ml). The solution was stirred at room temperature overnight. The mixture was neutralized by Na<sub>2</sub>CO<sub>3</sub> and extracted with dichloromethane. The combined organic phases were dried over sodium sulphate and concentrated in vacuo. The residue of **5** was purified over a silica column to give the title compound as oil (1.0g, 93%yield two steps, MeOH/DCM=1/10).

**8-(5-chloro-2-hydroxybenzyl)-3-ethyl-1-(4-methoxybenzyl)-1,3,8-triazaspiro[4.5]decane-2,4-dione (10g).** **S6** (0.2g, 0.63mmol) and 5-Chlorosalicylaldehyde (0.14g, 0.89mmol) were dissolved in ethanol and refluxed overnight. The reaction was cooled to room temperature and sodium cyanoborohydride (0.3g, 4.77mmol) was added. The reaction was stirred overnight. The mixture was concentrated in vacuo and extracted with dichloromethane. The combined organic phases were dried over sodium sulphate and concentrated in vacuo. The residue was purified by HPLC to give the title compound as a solid (0.17g, 59%yield). HPLC >98% pure. ES-MS *m/z* 458 (MH<sup>+</sup>). <sup>1</sup>H NMR (400 MHz, CDCl<sub>3</sub>) δ 7.22 (d, *J*=8.4Hz, 2H), 7.11 (d, *J*=8.8Hz, 1H), 6.94 (s, 1H), 6.86 (d, *J*=8.4Hz, 2H), 6.73 (d, *J*=8.8Hz, 1H), 4.47 (s, 2H), 3.79 (s, 3H), 3.72 (s, 2H), 3.59 (q, *J*=7.2Hz, 2H), 2.94 (t, *J*=11.6Hz, 2H), 2.83-2.80 (m, 2H), 1.99-1.91 (m, 2H), 1.60-1.57 (m, 2H), 1.23 (q, *J*=7.2Hz, 3H).

**4-((8-(5-chloro-2-hydroxybenzyl)-3-ethyl-2,4-dioxo-1,3,8-triazaspiro[4.5]decan-1-yl)methyl)benzotrifluoroacetate (10h).** *Tert*-butyl 3-ethyl-2,4-dioxo-1,3,8-triazaspiro[4.5]decane-8-carboxylate (0.34 mmol) was dissolved in DMF (3 mL) and treated with sodium hydride dispersed in mineral oil (0.4 mmol). The reaction stirred for 15 minutes before the addition of 4-(bromomethyl)benzotrifluoroacetate. The reaction stirred at room temperature under positive nitrogen pressure for 2 hours. The mixture was quenched with water and dissolved in ammonium chloride. The organic product was extracted with ethyl acetate. The product was then treated with 20% TFA in dichloromethane to remove the boc protecting group. The mixture stirred for 1 hour yielding the desired compound, 4-({3-ethyl-2,4-dioxo-1,3,8-triazaspiro[4.5]deca-1-yl}methyl)benzotrifluoroacetate, as a TFA salt.

A mixture of 4-({3-ethyl-2,4-dioxo-1,3,8-triazaspiro[4.5]deca-1-yl}methyl)benzotrifluoroacetate (0.25 mmol) and 5-chlorosalicylaldehyde (0.37 mmol) was dissolved in DMF (4 mL) and stirred for 2 hour before the addition of sodium triacetoxyborohydride (0.48 mmol). The reaction stirred at room temperature under positive nitrogen pressure for 3 days. The mixture was quenched with water and dissolved in saturated sodium bicarbonate. The organic product was extracted with ethyl acetate. The crude product was then purified by reverse phase HPLC. The product was then lyophilized yielding a white fluffy solid. White solid, 58.6 mg,

0.129 mmol, 62.8% yield. HPLC purity > 95%. LC-MS  $m/z$  453  $[MH^+]$ .  $^1H$  NMR (400 MHz, DMSO- $d_6$ )  $\delta$  1.15 (t,  $J=7.21$  Hz, 3 H) 1.93 - 2.03 (m, 2 H) 2.08 (d,  $J=7.83$  Hz, 2 H) 3.46 (q,  $J=7.25$  Hz, 6 H) 4.26 (br. d,  $J=1.00$  Hz, 2 H) 4.53 (s, 2 H) 6.96 (d,  $J=8.80$  Hz, 1 H) 7.35 (dd,  $J=8.56, 2.69$  Hz, 1 H) 7.44 - 7.57 (m, 3 H) 7.82 (d,  $J=8.31$  Hz, 3 H).

**8-(5-chloro-2-hydroxybenzyl)-3-ethyl-1-(4-(trifluoromethyl)benzyl)-1,3,8-triazaspiro[4.5]decane-2,4-dione hydrochloride (10i).** Tert-butyl 3-ethyl-2,4-dioxo-1,3,8-triazaspiro[4.5]decane-8-carboxylate (0.35 mmol) was dissolved in DMF (2 mL) and treated with sodium hydride dispersed in mineral oil (0.4 mmol). The reaction stirred for 15 minutes before the addition of 4-(trifluoromethyl)benzyl bromide. The reaction stirred at room temperature under positive nitrogen pressure for 24 hours. The mixture was quenched with water and dissolved in ammonium chloride. The organic product was extracted with ethyl acetate. The product was then treated with HCl in ether to remove the boc protecting group. The mixture stirred for 24 hours yielding the desired compound, 3-ethyl-1-{[4-(trifluoromethyl)phenyl]methyl}-1,3,8-triazaspiro[4.5]decane-2,4-dione, as an HCl salt.

A mixture of 3-ethyl-1-{[4-(trifluoromethyl)phenyl]methyl}-1,3,8-triazaspiro[4.5]decane-2,4-dione (0.18 mmol) and 5-chlorosalicylaldehyde (0.33 mmol) was dissolved in DMF (3 mL) and stirred for 1 hour before the addition of sodium triacetoxyborohydride (0.4 mmol). The reaction stirred at room temperature under positive nitrogen pressure for 3 days. The mixture was quenched with water and dissolved in saturated sodium bicarbonate. The organic product was extracted with ethyl acetate. The crude product was then purified by reverse phase HPLC. The purified product was then treated with HCl in ether to yield the final compound as an HCl salt. White solid, 47.6 mg, 0.095 mmol, 56.98% yield. HPLC purity > 95%. ES-MS  $m/z$  495  $[MH^+]$ .  $^1H$  NMR (400 MHz, DMSO- $d_6$ )  $\delta$  1.05 - 1.22 (m, 3 H) 1.96 (d,  $J=14.43$  Hz, 2 H) 2.27 - 2.43 (m, 2 H) 3.28 - 3.60 (m, 6 H) 4.24 (br. s., 2 H) 4.56 (s, 2 H) 6.98 (d,  $J=8.56$  Hz, 1 H) 7.34 (dd,  $J=8.68, 2.57$  Hz, 1 H) 7.53 - 7.65 (m, 3 H) 7.71 (d,  $J=8.31$  Hz, 2 H) 10.59 (s, 1 H).

**Synthesis of 8-(5-chloro-2-hydroxybenzyl)-1-isopentyl-1,3,8-triazaspiro[4.5]decane-2,4-dione (11a).**

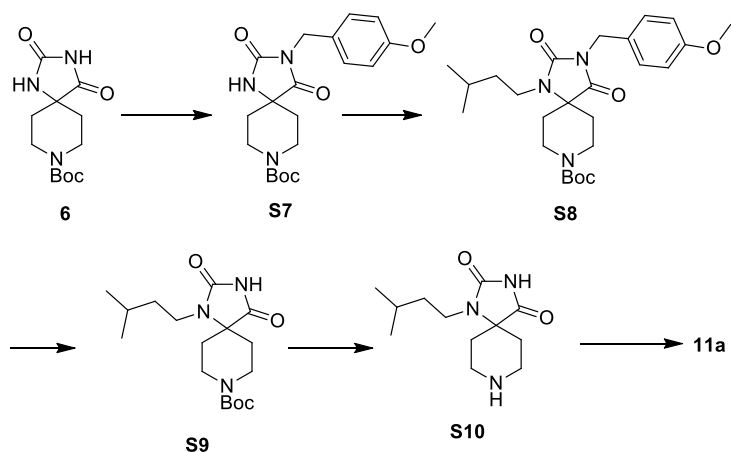

**tert-butyl 3-(4-methoxybenzyl)-2,4-dioxo-1,3,8-triazaspiro[4.5]decane-8-carboxylate (S7).** To a solution of tert-butyl 2,4-dioxo-1,3,8-triazaspiro[4.5]decane-8-carboxylate **6** (2 g, 7.4 mmol) and potassium carbonate (1.23g, 8.9mmol) in DMF was added 4-methoxybenzylchloride (1.4 g, 9.0 mmol). The mixture was stirred at room temperature overnight. The mixture was



extracted with ethyl acetate. The combined organic phases were washed with brine, dried over sodium sulphate and concentrated in vacuo to give the title compound which was used without further purification.

**tert-butyl 1-isopentyl-3-(4-methoxybenzyl)-2,4-dioxo-1,3,8-triazaspiro[4.5]decane-8-carboxylate (S8).** To a solution of S7 in dry DMF was added sodium hydride (0.3g, 12.5mmol) and stirred for 30min followed by isopentyl iodide (1.92g, 10.43mmol) was added. The reaction was stirred at room temperature overnight. The mixture was extracted with ethyl acetate. The combined organic phases were washed with brine, dried over sodium sulphate and concentrated in vacuo. The title compound was used without further purification.

**tert-butyl 1-isopentyl-2,4-dioxo-1,3,8-triazaspiro[4.5]decane-8-carboxylate (S9).** To a solution of S8 in acetonitrile (30 ml) was added a solution of ammonium cerium (IV) nitrate (20.38 g, 37.17 mmol) in water (30 ml). The mixture was stirred at room temperature overnight. The residue was purified over a silica column to obtain an impure title compound (3.5g).

**1-isopentyl-1,3,8-triazaspiro[4.5]decane-2,4-dione (S10).** S9 (1.4g, impure) was dissolved in DCM (5ml) and TFA (10ml). The solution was stirred at room temperature overnight. The mixture was neutralized by NaHCO<sub>3</sub> and extracted with dichloromethane. The combined organic phases were dried over sodium sulphate and concentrated in vacuo. The residue was purified over a silica column to give the title compound (0.6g, 84% yield four steps).

**8-(5-chloro-2-hydroxybenzyl)-1-isopentyl-1,3,8-triazaspiro[4.5]decane-2,4-dione (11a).** S10 (0.297g, 0.78mmol) and 5-chlorosalicylaldehyde (0.27g, 1.72mmol) were dissolved in ethanol and refluxed overnight. The reaction was cooled to room temperature and sodium cyanoborohydride (0.32g, 4.77mmol) was added. The mixture was stirred overnight. The mixture was concentrated in vacuo and extracted with dichloromethane. The combined organic phases were dried over sodium sulphate and concentrated in vacuo. The residue was purified by HPLC to give the title compound as a solid (0.23g, 50%yield). HPLC >95% pure. ES-MS m/z 380 (MH<sup>+</sup>). <sup>1</sup>H NMR (400 MHz, CDCl<sub>3</sub>) δ 7.12 (d, *J*=8.8Hz, 1H), 6.97 (s, 1H), 6.75 (d, *J*=8.8Hz, 1H), 3.77 (s, 2H), 3.20-3.18 (m, 2H), 3.00-2.90 (m, 4H), 2.04-1.96 (m, 2H), 1.82-1.79 (m, 2H), 1.65-1.56 (m, 1H), 1.53-1.47 (m, 2H), 0.94 (d, *J*=8.8Hz, 6H).

### Synthesis of 8-(5-chloro-2-hydroxybenzyl)-1-isopentyl-3-isopropyl-1,3,8-triazaspiro[4.5]decane-2,4-dione (11b).

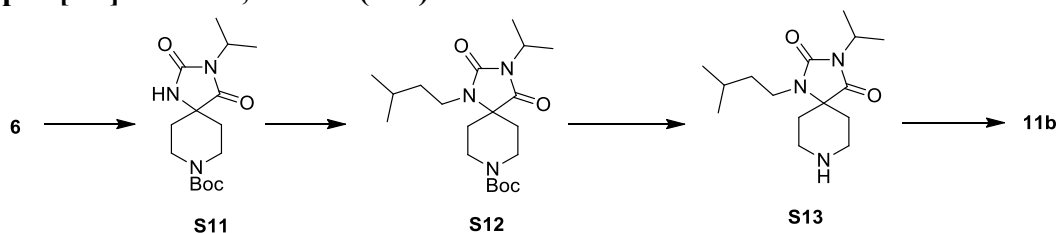

**tert-butyl 3-isopropyl-2,4-dioxo-1,3,8-triazaspiro[4.5]decane-8-carboxylate (S11).** To a solution of tert-butyl 2,4-dioxo-1,3,8-triazaspiro[4.5]decane-8-carboxylate 6 (2 g, 7.4 mmol) and potassium carbonate (1.23 g, 8.9 mmol) in DMF was added 2-iodopropane (1.53 g, 9.0 mmol). The reaction was stirred at room temperature overnight. The mixture was extracted with ethyl acetate. The combined organic phases were washed with brine, dried over sodium sulphate and concentrated in vacuo to give the title compound was used without further purification.

**tert-butyl 1-isopentyl-3-isopropyl-2,4-dioxo-1,3,8-triazaspiro[4.5]decane-8-carboxylate (S12).** To a solution of S11 (2.3 g, 7.39 mmol) in dry DMF was added sodium

hydride (0.22 g, 9.2 mmol) and stirred for 30min, followed by isopentyl iodide (1.92 g, 10.43 mmol) was added. The reaction was stirred at room temperature overnight. The mixture was extracted with ethyl acetate. The combined organic phases were washed with brine, dried over sodium sulphate and concentrated in vacuo. The residue was used without further purification.

**1-isopentyl-3-isopropyl-1,3,8-triazaspiro[4.5]decane-2,4-dione (S13).** tert-butyl 1-isopentyl-3-isopropyl-2,4-dioxo-1,3,8-triazaspiro[4.5]decane-8-carboxylate (**S12**) was dissolved in DCM (15 ml) and TFA (15 ml). The solution was stirred at room temperature overnight. The mixture was neutralized by Na<sub>2</sub>CO<sub>3</sub> and extracted with dichloromethane. The combined organic phases were dried over sodium sulphate and concentrated in vacuo. The residue was purified over a silica column (MeOH/DCM=1/10) to give the title compound as oil (1.8 g, 91% yield three steps).

**8-(5-chloro-2-hydroxybenzyl)-1-isopentyl-3-isopropyl-1,3,8-triazaspiro[4.5]decane-2,4-dione (11b).** **S13** (0.24 g, 0.9 mmol) and 5-chlorosalicylaldehyde (0.18 g, 1.15 mmol) were dissolved in ethanol and refluxed overnight. The reaction was cooled to room temperature and sodium cyanoborohydride (0.32 g, 4.77 mmol) was added. The mixture was stirred overnight. The mixture was concentrated in vacuo and extracted with dichloromethane. The combined organic phases were dried over sodium sulphate and concentrated in vacuo. The residue was used purified by HPLC to give the title compound as a solid (0.20 g, 55% yield). HPLC >98% pure. ES-MS m/z 422 (MH<sup>+</sup>). <sup>1</sup>H NMR (400 MHz, CDCl<sub>3</sub>) δ 7.11 (d, *J*=8.8Hz, 1H), 6.96 (s, 1H), 6.74 (d, *J*=8.4Hz, 1H), 4.31-4.24 (m, 1H), 3.76 (s, 2H), 3.17 (t, *J*=8.0Hz, 2H), 2.99 (t, *J*=11.6Hz, 2H), 2.90-2.88 (m, 2H), 2.01-1.94 (m, 2H), 1.70-1.67 (m, 2H), 1.63-1.55 (m, 1H), 1.52-1.47 (m, 2H), 1.38 (d, *J*=6.8Hz, 6H), 0.94 (d, *J*=6.4Hz, 6H).

**8-(3-chloro-5-hydroxybenzyl)-3-ethyl-1-isopentyl-1,3,8-triazaspiro[4.5]decane-2,4-dione hydrochloride (12a).** A mixture of **12n** (0.15 mmol) and 3-chloro-5-hydroxybenzaldehyde (0.22 mmol) was dissolved in DMF (2 mL) and stirred for 30 minutes before the addition of sodium triacetoxyborohydride (0.3 mmol). The reaction stirred at room temperature for 24 hours. A second addition of 3-chloro-5-hydroxybenzaldehyde (0.1 mmol) was added to the mixture and stirred for 30 minutes before the addition of sodium triacetoxyborohydride (0.22 mmol). The reaction stirred for another 24 hours. The mixture was quenched with water, dissolved in saturated sodium bicarbonate and the crude product was extracted with ethyl acetate. The crude product was purified by reverse phase HPLC. It was then treated with HCl in ether to give the final purified compound as an HCl salt. White solid, 43.8 mg, 0.107 mmol, 62.94% yield, HPLC purity > 95%. ES-MS m/z 408 [MH<sup>+</sup>]. <sup>1</sup>H NMR (400 MHz, DMSO-d<sub>6</sub>) δ 0.91 (d, *J*=6.60 Hz, 6 H) 1.09 (t, *J*=7.21 Hz, 3 H) 1.38 - 1.50 (m, 2 H) 1.55 (d, *J*=6.85 Hz, 2 H) 1.96 (d, *J*=14.67 Hz, 2 H) 2.35 - 2.48 (m, 2 H) 3.10 - 3.24 (m, 2 H) 3.37 - 3.48 (m, 4 H) 4.32 (d, *J*=4.89 Hz, 2 H) 6.88 - 6.95 (m, 1 H) 7.00 (s, 1 H) 7.20 (s, 1 H) 10.28 (s, 1 H).

**8-[(3-chloro-4-hydroxyphenyl)methyl]-3-ethyl-1-(3-methylbutyl)-1,3,8-triazaspiro[4.5]decane-2,4-dione hydrochloride hydrochloride (12b).** A mixture of **12n** (0.15 mmol) and 3-chloro-4-hydroxybenzaldehyde (0.20 mmol) was dissolved in DMF (2 mL) and was stirred at room temp for 30 minutes before the addition of sodium triacetoxyborohydride (0.20 mmol). The reaction stirred under positive nitrogen pressure at room temp for 24h. The mixture was the quenched with water, dissolved in water/brine, and extracted with DCM washes. The crude was then dissolved into ether and purified by salt formation with 4M HCl in dioxane.

White powder, 10 mg, .03 mmol, 11.3% yield, HPLC purity >95%. ES-MS m/z 408 [MH<sup>+</sup>]. <sup>1</sup>H NMR (400 MHz, DMSO-d<sub>6</sub>) δ 0.89 (t, J=7.09 Hz, 6 H) 1.07 (d, J=7.09 Hz, 3 H) 1.42 (br. s., 2 H) 1.55 (d, J=5.38 Hz, 1 H) 1.94 (d, J=9.05 Hz, 2 H) 3.17 (br. s., 3 H) 3.23 - 3.49 (m, 6 H) 4.27 (br. s., 2 H) 7.03 (d, J=7.34 Hz, 1 H) 7.37 (br. s., 1 H) 7.65 (br. s., 1 H) 10.45 (br. s., 1 H) 10.61 (br. s., 1 H).

**3-ethyl-8-[(5-fluoro-2-hydroxyphenyl)methyl]-1-(3-methylbutyl)-1,3,8-triazaspiro[4.5]decane-2,4-dione hydrochloride (12c).** A mixture of **12n** (0.15 mmol) and 5-bromo-3-fluoro-2-hydroxybenzaldehyde (0.20 mmol) was dissolved in DMF (2 mL) and was stirred at room temp for 30 minutes before the addition of sodium triacetoxyborohydride (0.20 mmol). The reaction stirred under positive nitrogen pressure at room temp for 24h. The mixture was quenched with water, dissolved in water/brine, and extracted with DCM washes. The crude was then dissolved into ether and purified by HCl salt formation. White powder, 10 mg, .03 mmol, 12.3% yield, HPLC purity > 95%. <sup>1</sup>H NMR (400 MHz, DMSO-d<sub>6</sub>) δ 0.80 - 0.98 (m, 6 H) 1.00 - 1.17 (m, 3 H) 1.42 (d, J=8.07 Hz, 2 H) 1.55 (dt, J=13.14, 6.51 Hz, 1 H) 1.96 (br. s., 2 H) 2.45 (br. s., 2 H) 3.17 (d, J=7.58 Hz, 2 H) 3.34 - 3.50 (m, 5 H) 4.26 (br. s., 2 H) 6.97 (dd, J=8.93, 4.77 Hz, 1 H) 7.15 (td, J=8.50, 3.30 Hz, 1H) 7.41 (d, J=9.05 Hz, 1 H) 10.27 (s, 1 H) 10.55 (br. s., 1 H)

**8-[(5-bromo-2-hydroxy-phenyl)methyl]-2-ethyl-4-isopentyl-2,4,8-triazaspiro[4.5]decane-1,3-dione hydrochloride (12d).** A mixture of **12n** (500 mg, 1.646 mmol, 1.0 equiv) and 5-bromo-2-hydroxy-benzaldehyde (376.6 mg, 1.81 mmol, 1.1 equiv) in DCE (5 mL) was stirred at room temperature under anhydrous conditions for 30 minutes. The solution was then treated with sodium triacetoxyborohydride (~698 mg, roughly 3.29 mmol, 2.0 equiv; solution turned purple upon addition) and the reaction was stirred for 5 days. It was then quenched using 1 mL of a saturated sodium bicarbonate solution, then was extracted with EtOAc. The organic layer was subsequently washed with a saturated solution of sodium chloride, dried with sodium sulfate, filtered and concentrated *in vacuo*. The resulting foam (0.9934 g) was then purified via flash chromatography (10-50% ethyl acetate/heptane). Fractions were concentrated and dissolved with diethyl ether (9 mL). It was then converted to an HCl salt by adding 750 μL of 1 M HCl in diethyl ether. The precipitate was filtered from the solution, yielding the target compound as a white solid in the form of an HCl salt (278 mg, 0.6150 mmol, 35%). <sup>1</sup>H NMR (400 MHz, DMSO-d<sub>6</sub>) δ 0.90 (d, J=6.53 Hz, 6 H) 1.07 (t, J=7.15 Hz, 3 H) 1.38 - 1.46 (m, 2 H) 1.48 - 1.60 (m, 1 H) 1.94 (d, J=14.05 Hz, 2 H) 2.41 - 2.48 (m, 2 H) 3.12 - 3.19 (m, 2 H) 3.33 - 3.41 (m, 3 H) 3.41 - 3.47 (m, 2 H) 4.25 (d, J=2.95 Hz, 2 H) 6.95 (d, J=8.72 Hz, 1 H) 7.46 (dd, J=8.72, 2.51 Hz, 1 H) 7.74 (d, J=2.26 Hz, 1 H) 10.67 (s, 1 H) 10.71 (br. s., 1 H). ES-MS m/z 452, 454 (MH<sup>+</sup>).

**3-ethyl-8-[(2-hydroxy-5-methylphenyl)methyl]-1-(3-methylbutyl)-1,3,8-triazaspiro[4.5]decane-2,4-dione hydrochloride (12e).** A mixture of **12n** (30.4 mg, 0.100, 1 equiv), and 2-hydroxy-5-methylbenzaldehyde (27.2 mg, 0.200 mmol, 2.0 equiv) dissolved in DMF (2.5 mL) was stirred at room temperature for thirty minutes before the addition of triacetoxyborohydride (53.1 mg, 0.251 mmol, 2.5 equiv; \*upon addition, solution turned a hazy yellow). This mixture was then stirred at r.t. for 24 hours, then quenched with a few drops of water. A few drops of TFA were then added and the clear solution was purified by reverse phase HPLC (10-60% acetonitrile/water/0.05% TFA). Pure fractions were neutralized with a solution

of saturated sodium bicarbonate, and extracted twice with 12 mL portions of EtOAc. The combined organic layers were then filtered, dried and concentrated. The resulting oily product was dissolved in diethyl ether (7 mL) and treated with 200  $\mu$ L HCl (1 M; in diethyl ether). The solvents were then allowed to evaporate, leaving a white solid as the target compound in the form of an HCl salt (27.4 mg, 0.0646 mmol, 64.6%).  $^1\text{H}$  NMR (400 MHz, DMSO- $d_6$ )  $\delta$  9.99 (s, 1 H), 7.27 (s, 1 H), 7.10 (d,  $J=1.0$  Hz, 1 H), 6.86 (d,  $J=8.2$  Hz, 1 H), 4.24 (d,  $J=4.6$  Hz, 2 H), 3.40 - 3.49 (m, 4 H), 3.38 (d,  $J=7.2$  Hz, 2 H), 3.15 (t,  $J=1.0$  Hz, 2 H), 2.32 - 2.44 (m, 2 H), 2.22 (s, 3 H), 1.95 (d,  $J=13.9$  Hz, 2 H), 1.54 (spt,  $J=1.0$  Hz, 1 H), 1.42 (q,  $J=1.0$  Hz, 2 H), 1.08 (t,  $J=7.2$  Hz, 3 H), 0.90 (d,  $J=6.6$  Hz, 6 H). ES-MS  $m/z$  389 ( $\text{MH}^+$ ).

**3-ethyl-8-[(2-hydroxy-5-phenylphenyl)methyl]-1-(3-methylbutyl)-1,3,8-triazaspiro[4.5]decane-2,4-dione hydrochloride (12f).** A solution of 8-[(5-bromo-2-hydroxyphenyl)methyl]-3-ethyl-1-(3-methylbutyl)-1,3,8-triazaspiro[4.5]decane-2,4-dione (**12d**; 100.3 mg, 0.205 mmol, 1.0 equiv), phenylboronic acid (50.0 mg, 0.410 mmol, 2.0 equiv), cesium carbonate (233.3 mg, 0.716 mmol, 3.5 equiv) and tetrakis(triphenylphosphine)palladium(0) (23.7 mg, 0.0205 mmol, 0.1 equiv) in a 1:1 ethanol/toluene solution was sparged with nitrogen and heated to 80  $^\circ\text{C}$ . After stirring for 40 minutes, the solution was cooled to room temperature, and water was added (2 mL) to neutralize excess cesium carbonate and quench the solution. The reaction mixture was then partitioned between two layers of EtOAc and sat. sodium bicarbonate. After separating the organic layer, the aqueous layer was extracted again; the organic layers were then combined, dried, filtered and concentrated *in vacuo*. The crude compound (dark orange oil, 186.2 mg) was then dissolved in 1 mL of acetonitrile/0.05% TFA, treated with a couple drops of TFA and loaded onto a Biotage 40 + M reverse phase HPLC column for purification (10-70% acetonitrile/water + 0.05% TFA gradient). Fractions were then combined and concentrated. The purified residue was then neutralized with a saturated bicarbonate solution and was extracted twice using EtOAc. The combined organic layers were then dried using sodium sulfate, filtered and concentrated yielding 33.8 mg of compound. It was then converted to an HCl salt by dissolving it in 5 mL of diethyl ether and treating it dropwise with 200  $\mu$ L of 1 M HCl (in diethyl ether). The precipitate was then filtered, yielding the target compound as a white solid in the form of an HCl salt (21.7 mg, 0.0466 mmol, 22%).  $^1\text{H}$  NMR (400 MHz, DMSO- $d_6$ )  $\delta$  0.90 (d,  $J=6.53$  Hz, 6 H) 1.09 (t,  $J=1.00$  Hz, 3 H) 1.39 - 1.48 (m, 2 H) 1.49 - 1.61 (m, 1 H) 1.95 (d,  $J=13.61$  Hz, 2 H) 2.53 - 2.61 (m, 2 H) 3.14 - 3.23 (m, 2 H) 3.35 - 3.42 (m, 4 H) 3.49 (br. s., 2 H) 4.33 (d,  $J=1.00$  Hz, 2 H) 7.07 (d,  $J=8.47$  Hz, 1 H) 7.28 - 7.35 (m, 1 H) 7.44 (t,  $J=7.69$  Hz, 2 H) 7.62 (dd,  $J=8.47, 2.26$  Hz, 1 H) 7.69 (d,  $J=7.34$  Hz, 2 H) 7.92 (d,  $J=1.69$  Hz, 1 H) 10.41 - 10.49 (m, 1 H). ES-MS  $m/z$  450 ( $\text{MH}^+$ ).

**8-[(2-chloro-6-hydroxyphenyl)methyl]-3-ethyl-1-(3-methylbutyl)-1,3,8-triazaspiro[4.5]decane-2,4-dione hydrochloride (12g).** A mixture of **12n** (76.1 mg, 0.25 mmol, 1 equiv) and 2-chloro-6-hydroxybenzaldehyde (81.2 mg, 0.52 mmol, 2.07 equiv) was dissolved in DMF (2 mL). It was then stirred at room temperature under anhydrous conditions for 30 minutes before the addition of sodium triacetoxyborohydride (86.5 mg, 0.63 mmol, 2.5 equiv). The reaction stirred at room temperature under anhydrous conditions for 24 h. It was then quenched with water (1 mL). A work up with EtOAc and saturated sodium bicarbonate was used to extract the organic layer, which was then washed twice. The aqueous layer was washed once. The clear organic layer was dried (sodium sulfate), filtered, and condensed yielding a yellow oil of 91 mg. This oil was purified by normal phase HPLC with a silica gel cartridge (0% to 50%

EtOAc/Hexane). Fractions were combined and condensed yielding 112 mg product as a low viscosity transparent yellow oil. It was then treated with 200  $\mu$ L of 2M HCl, filtered and dried yielding the target compound as an HCl salt (123 mg, 0.277 mmol, 95.6%).  $^1\text{H}$  NMR (400 MHz, DMSO- $d_6$ )  $\delta$  0.81 - 0.98 (m, 6 H) 1.08 (t,  $J=7.21$  Hz, 3 H) 1.35 - 1.65 (m, 3 H) 1.95 (d,  $J=13.69$  Hz, 2 H) 2.40 - 2.67 (m, 2 H) 3.00 - 3.28 (m, 2 H) 4.40 (br. s., 4 H) 6.92 - 7.18 (m, 4 H) 7.23 - 7.55 (m, 2 H) 10.18 (br. s., 1 H) 11.11 (br. s., 1 H). ES-MS  $m/z$  408 (M+H).

**8-[(4-chloro-2-hydroxyphenyl)methyl]-3-ethyl-1-(3-methylbutyl)-1,3,8-triazaspiro[4.5]decane-2,4-dione hydrochloride (12h).** A mixture of **12n** (30.3 mg, 0.10 mmol, 1 equiv) and 4-chloro-2-hydroxybenzaldehyde (34.4 mg, 0.21 mmol, 2.07 equiv) was dissolved in DMF (2 mL) and stirred at room temperature for 30 minutes before the addition of sodium triacetoxyborohydride (34.5 mg, 0.1 mmol, 1 equiv). The reaction stirred at room temperature under anhydrous conditions for 24 h. It was then quenched with water (1 mL). A work up with EtOAc and saturated sodium bicarbonate was performed to extract the organic layer, which was then washed twice. The aqueous layer was washed once. The organic layer was dried (sodium sulfate) and condensed yielding 45 mg as a clear oil. The oil was then purified by reverse phase HPLC (0% to 95% acetonitrile/water/0.05% TFA). Fractions were combined yielding the desired compound as a clear oil. This oil was then dissolved in acetonitrile (1 mL) and treated with 2 M HCl in diethyl ether (0.02 mL). A precipitate formed and was resuspended in diethyl ether. It was then filtered yielding the final compound as a white solid HCl salt. (30.2 mg, 0.074 mmol, 64.56% yield).  $^1\text{H}$  NMR (400 MHz, DMSO- $d_6$ )  $\delta$  10.43 (s, 1 H), 10.15 (d,  $J=0.7$  Hz, 1 H), 7.77 (d,  $J=8.8$  Hz, 1 H), 7.62 (d,  $J=8.6$  Hz, 2 H), 6.83 - 7.01 (m, 4 H), 4.40 (d,  $J=4.2$  Hz, 1 H), 3.28 - 3.55 (m, 4 H), 3.07 - 3.22 (m, 2 H), 1.98 (d,  $J=13.4$  Hz, 2 H), 1.50 - 1.60 (m, 1 H), 1.38 - 1.48 (m, 2 H), 1.03 - 1.15 (m, 3 H), 0.86 - 0.96 (m, 6 H). ES-MS  $m/z$  408.93 (M+H).

**8-[(3-chloro-2-hydroxyphenyl)methyl]-3-ethyl-1-(3-methylbutyl)-1,3,8-triazaspiro[4.5]decane-2,4-dione hydrochloride (12i).** A mixture of **12n** (0.15 mmol) and 3-chloro-2-hydroxybenzaldehyde (0.20 mmol) was dissolved in DMF (2 mL) and was stirred at room temp for 30 minutes before the addition of sodium triacetoxyborohydride (0.20 mmol). The reaction stirred under positive nitrogen pressure at room temp for 24h. The mixture was quenched with water, dissolved in water/brine, and extracted with DCM washes. The crude was then dissolved into ether and purified by HCl salt formation with 4M HCl in dioxane. Clear resin, HCl salt, 40mg, 0.0877 mmol, 43% yield, >94% HPLC purity, ES-MS  $m/z$  408 (M+H).  $^1\text{H}$  NMR (400 MHz, DMSO- $d_6$ )  $\delta$  9.98 - 10.23 (m, 1 H), 7.55 (d,  $J=7.8$  Hz, 2 H), 7.02 (t,  $J=7.8$  Hz, 1 H), 4.43 (br. s., 2 H), 3.49 (br. s., 4 H), 3.42-3.46 (m, 2 H), 3.13-3.30 (m, 2 H), 2.50 (d,  $J=1.7$  Hz, 2 H), 2.00 (d,  $J=14.2$  Hz, 2 H), 1.60 (s, 1 H), 1.40-1.53 (m, 2 H), 1.05-1.18 (m, 3 H), 0.90 - 1.02 (m, 6 H).

**8-[(3,5-dichloro-2-hydroxyphenyl)methyl]-3-ethyl-1-(3-methylbutyl)-1,3,8-triazaspiro[4.5]decane-2,4-dione hydrochloride (12j).** A mixture of **12n** (30.3 mg, 0.10 mmol, 1 equiv) and 3,5-dichloro-2-hydroxybenzaldehyde (38.2 mg, 0.20 mmol, 2 equiv) was dissolved in DMF (2 mL) and stirred at room temperature for 30 minutes before the addition of sodium triacetoxyborohydride (52.9 mg, 0.25 mmol, 2.5 equiv). The reaction stirred at room temperature under anhydrous conditions for 24 h. It was then quenched with water (1 mL) then purified by reverse phase HPLC (0% to 75% acetonitrile/water/0.05% TFA). The product was treated with 2

M HCl in diethyl ether (0.1 mL) and stirred for 15 minutes before being filtered and dried to yield 50.9 mg product as a HCl salt. Aldehyde was still present in the final product so the solid was then dissolved in minimum amount of DCM and loaded onto an SCX column (2 g). The residual impurities were eluted with 1:1 MeOH/DCM (10 mL). The product was eluted with 2 M Ammonia/MeOH (10 mL). The ammonia eluent was then condensed yielding 30.2 mg final compound. The column was regenerated using 10 mL 5% TFA/CH<sub>3</sub>CN. The ammonia product was then condensed and dissolved in diethyl ether (1 mL). The product was then treated with 2 M HCl in diethyl ether (0.05 mL) to make an HCl salt. The salt was filtered, yielding the final compound as a white HCl salt. (25.5 mg, 0.0576 mmol, 44.24% yield). <sup>1</sup>H NMR (400 MHz, DMSO-d<sub>6</sub>) δ 7.42 (d, J=2.4 Hz, 1 H), 7.23 (s, 1 H), 3.85 (br. s., 1 H), 3.39 (q, J=7.1 Hz, 4 H), 3.15 - 3.30 (m, 2 H), 2.85 (br. s., 2 H), 1.94 - 2.13 (m, 4 H), 1.72 (d, J=13.2 Hz, 2 H), 1.52 - 1.64 (m, 1 H), 1.36 - 1.49 (m, 2 H), 1.08 (t, J=7.2 Hz, 3 H), 0.92 (d, J=6.6 Hz, 6 H). ES-MS m/z 443.38 (M+H).

**8-[(4,5-dichloro-2-hydroxyphenyl)methyl]-3-ethyl-1-(3-methylbutyl)-1,3,8-triazaspiro[4.5]decane-2,4-dione hydrochloride (12k).** A mixture of **12n** (30.3 mg, 0.10 mmol, 1 equiv) and 4,5-dichloro-2-hydroxybenzaldehyde (38.2 mg, 0.20 mmol, 2 equiv) was dissolved in DMF (2 mL) and stirred at room temperature for 30 minutes before the addition of sodium triacetoxyborohydride (50.8 mg, 0.24 mmol, 2.4 equiv). The reaction stirred at room temperature under anhydrous conditions for 24 h. It was then quenched with water (1 mL) then purified by reverse phase HPLC (10% to 75% acetonitrile/water/0.05% TFA). The product was treated with 2 M HCl in diethyl ether (0.1 mL) and stirred for 15 minutes before being filtered and dried to yield 66.7 mg product as a HCl salt. The solid was then dissolved in minimum amount of DCM and loaded onto an SCX column (2 g). The residual impurities were eluted with 1:1 MeOH/DCM (10 mL). The product was eluted with 2 M Ammonia/MeOH (10 mL). The ammonia eluent was then condensed yielding 30.2 mg final compound. The ammonia product was then condensed and dissolved in diethyl ether (1 mL). The product was then treated with 2 M HCl in diethyl ether (0.05 mL) to make an HCl salt. The salt was filtered, yielding the final compound as an off white HCl salt (25.6 mg, 0.0532 mmol, 46.82% yield). <sup>1</sup>H NMR (400 MHz, DMSO-d<sub>6</sub>) δ 7.42 (s, 1 H), 7.00 (s, 1 H), 3.66 (br. s., 1 H), 3.38 (q, J=7.2 Hz, 4 H), 3.09 - 3.25 (m, 2 H), 2.78 (br. s., 4 H), 1.89 - 2.08 (m, 2 H), 1.69 (br. s., 2 H), 1.53 - 1.65 (m, 1 H), 1.34 - 1.51 (m, 2 H), 1.07 (t, J=7.2 Hz, 3 H), 0.91 (d, J=6.6 Hz, 6 H). ES-MS m/z 443.84 (M+H).

**8-[(2,3-dichloro-6-hydroxyphenyl)methyl]-3-ethyl-1-(3-methylbutyl)-1,3,8-triazaspiro[4.5]decane-2,4-dione trifluoroacetate (12l).** A mixture of **12n** (45.4 mg, 0.15 mmol, 1 equiv) and 2,3-dichloro-6-hydroxybenzaldehyde (43.0 mg, 0.22 mmol, 1.5 equiv) was dissolved in DMF (2 mL) and stirred at room temperature for 90 minutes before the addition of sodium triacetoxyborohydride (80 mg, 0.37 mmol, 2.5 equiv). The reaction stirred at room temperature under nitrogen atmosphere for 18 h. It was then quenched with water (1 mL) then purified by reverse phase HPLC (10% to 90% acetonitrile/water/0.05% TFA). The solution was then evaporated *in-vacuo* and lyophilized to afford a colorless powder of the desired product as a TFA salt (28.0 mg, 34% yield). <sup>1</sup>H NMR (400 MHz, DMSO-d<sub>6</sub>) δ 7.61 (d, J= 9.05 Hz, 1 H), 7.02 (d, J= 9.05 Hz, 1 H), 4.46 (brs, 1H), 3.48-3.71 (m, 4H), 3.40 (q, J=7.2 Hz, 2H), 3.12 (appt/m, 1H), 2.22-2.38 (m, 2 H), 1.98 (d, J= 14.4 Hz, 2H), 1.50 - 1.62 (m, 1 H), 1.36-1.47 (m, 2H), 1.10 (t, J=7.2 Hz, 3 H), 0.89 (d, J=6.6 Hz, 6 H). ES-MS m/z 442 (<sup>35</sup>ClM+H), m/z 444 (<sup>37</sup>ClM+H), m/z 464 (<sup>35</sup>ClM+Na), and m/z 466 (<sup>37</sup>ClM+Na).

**8-(5-chloro-2-hydroxybenzoyl)-3-ethyl-1-isopentyl-1,3,8-triazaspiro[4.5]decane-2,4-dione (12m).** 3-ethyl-1-isopentyl-1,3,8-triazaspiro[4.5]decane-2,4-dione hydrochloride (**12n**) (0.1g, 0.374mmol), 5-chlorosalicylic acid (0.084g, 0.487mmol), EDCI (0.1g, 0.52mmol), HOBt (0.076g, 0.56mmol), Et<sub>3</sub>N (0.26ml, 1.86mmol) and DMAP (4.5mg, 0.037mmol) were dissolved in DCM. The reaction was stirred at room temperature overnight. The mixture was extracted with DCM. The combined organic phases were washed with citric acid solution, dried over sodium sulphate and concentrated in vacuo. The residue was purified by HPLC to give the title compound as a solid (72mg, 45.6%yield). ES-MS m/z 422 (MH<sup>+</sup>). <sup>1</sup>H NMR (400 MHz, d<sup>6</sup>-DMSO) δ 10.12 (s, 1H), 7.28-7.25 (m, 2H), 6.89 (d, J=8.8Hz, 1H), 4.54-4.50 (m, 1H), 3.64-3.58 (m, 1H), 3.42-3.37 (m, 3H), 3.17 (s, 2H), 1.93-1.88 (m, 2H), 1.77-1.74 (m, 1H), 1.64-1.54 (m, 2H), 1.42-1.41 (m, 2H), 1.10 (t, J=7.2Hz, 3H), 0.91 (d, J=6.4Hz, 6H).

**3-ethyl-8-(3-hydroxypropyl)-1-(3-methylbutyl)-1,3,8-triazaspiro[4.5]decane-2,4-dione hydrochloride (12o).** A mixture of **12n** (100 mg, 0.329 mmol, 1.0 equiv), bromopropanol (29.5 μL; 0.329 mmol, 1 equiv) and potassium carbonate (181.9 mg, 1.317 mmol, 4 equiv) in acetonitrile (1 mL) was stirred at 60 °C in a 2 dram vial for 4 days. The mixture was cooled to room temp, diluted with ethyl acetate and filtered through a syringe filter. The filtrate was concentrated to give 99 mg of a clear oil. The oil was dissolved in diethyl ether and filtered again through a syringe filter to remove residual salts. The filtrate was then treated with 1 M HCl in diethyl ether (0.5 mL; white precipitate formed). After drying, white crystalline product was somewhat gummy, so ~6 mL of diethyl ether was added and mixture was slurried for ~24 hours. It was then filtered and dried to give the target compound as an HCl salt (75.7 mg, 0.209 mmol, 60.4%). <sup>1</sup>H NMR (400 MHz, DMSO-d<sub>6</sub>) δ 2.74 (s, 1 H), 2.65 (t, J=1.0 Hz, 2 H), 2.52 - 2.60 (m, 4 H), 2.43 - 2.49 (m, 2 H), 2.36 (t, J=1.0 Hz, 2 H), 1.67 (dt, J=3.7, 1.8 Hz, 4 H), 1.09 - 1.18 (m, 2 H), 0.98 - 1.08 (m, 2 H), 0.74 (spt, J=1.0 Hz, 1 H), 0.63 (q, J=1.0 Hz, 2 H), 0.27 (t, J=1.0 Hz, 3 H), 0.09 (d, J=6.6 Hz, 6 H). ES-MS m/z 326 (MH<sup>+</sup>).

**8-[(2-aminopyridin-3-yl)methyl]-3-ethyl-1-(3-methylbutyl)-1,3,8-triazaspiro[4.5]decane-2,4-dione hydrochloride (12p).** A mixture of **12n** (100 mg, 0.329 mmol, 1.0 equiv), and 2-amino-3-formylpyridine (81 mg, 0.663 mmol, 2equiv) was dissolved in DMF (2 mL) and was stirred at room temp for 30 minutes before the addition of sodium triacetoxyborohydride (110.8 mg, 0.802 mmol, 2.436 equiv). The reaction was stirred at room temp for 48 h. The reaction was quenched with a few drops of TFA. Solution was then purified by reverse phase HPLC (10 to 60% acetonitrile/water/0.05%TFA). Fractions were combined and were then washed with saturated sodium bicarbonate and extracted with EtOAc. The organic layer was then dried, filtered, and concentrated leaving an oil. The oil was then dissolved in ~5mL of diethyl ether, transferred to a 2 dram vial, and treated dropwise with 330 μL of HCl (1M in diethyl ether). The precipitate was slurried for about 30 minutes, then filtered and dried, yielding the target compound as a an off-white solid in the form of an HCl salt (73.1mg, 0.178 mmol, 54.2%). <sup>1</sup>H NMR (400 MHz, DMSO-d<sub>6</sub>) δ 8.37 (d, J=7.1 Hz, 1 H), 8.12 (dd, J=6.2, 1.6 Hz, 1 H), 6.98 (dd, J=7.4, 6.2 Hz, 1 H), 4.45 (br. s., 2 H), 3.52 (br. s., 4 H), 3.40 (q, J=7.2 Hz, 2 H), 3.21 (t, J=1.0 Hz, 2 H), 2.62 (br. s., 2 H), 2.57 - 2.61 (m, 2 H), 1.95 (d, J=13.7 Hz, 2 H), 1.55 (spt, J=1.0 Hz, 1 H), 1.44 (q, J=1.0 Hz, 2 H), 1.10 (t, J=7.2 Hz, 3 H), 0.90 (d, J=6.6 Hz, 6 H). ES-MS m/z 374 (MH<sup>+</sup>).

**8-((2-amino-5-chloropyridin-3-yl)methyl)-3-ethyl-1-isopentyl-1,3,8-triazaspiro[4.5]decane-2,4-dione (12q)**

A mixture of **12n** (0.3 mmol) and 2-amino-5-chloronicotinaldehyde (0.44 mmol) was dissolved in DMF (2 mL) and stirred at room temperature for 30 minutes before the addition of sodium triacetoxyborohydride (0.59 mmol). The reaction stirred under positive nitrogen pressure at room temp for 24 hr. After 24 hours additional 2-amino-5-chloronicotinaldehyde (0.2 mmol) was added to the solution and stirred for 30 minutes before the addition of sodium triacetoxyborohydride (0.3 mmol). The reaction stirred for another 24 hours. The mixture was quenched with water, dissolved in saturated sodium bicarbonate and the crude product was extracted with ethyl acetate. The crude product was purified by reverse phase HPLC yielding the final compound as a TFA salt. The compound was converted to a free base using saturated sodium bicarbonate and extracted with ethyl acetate. Yellow powder, 44.7 mg, 0.109 mmol, 27% yield, >95% HPLC Purity, <sup>1</sup>H NMR (400 MHz, DMSO-d<sub>6</sub>) δ 0.90 (d, J=6.60 Hz, 6 H) 1.06 (t, J=7.09 Hz, 3 H) 1.37 - 1.48 (m, 1 H) 1.51 - 1.68 (m, 2 H) 1.87 - 2.00 (m, 2 H) 2.63 - 2.75 (m, 4 H) 3.10 - 3.21 (m, 2 H) 3.27 - 3.46 (m, 6 H) 6.20 (s, 2 H) 7.44 (d, J=2.69 Hz, 1 H) 7.87 (d, J=2.69 Hz, 1 H). ES-MS m/z 408.1 (MH<sup>+</sup>).

**3-ethyl-1-(3-methylbutyl)-8-[(pyridin-2-yl)carbonyl]-1,3,8-triazaspiro[4.5]decane-2,4-dione (12r)**. To a mixture of **12n** (100 mg, 0.329 mmol, 1.0 equiv) and picolinic acid (0.362 mmol, 1.1 equiv) in DCM (4 mL) was added HOBT (0.494 mmol, 1.5 equiv), EDC and 4-ethylmorpholine (206 μL, 1.646 mmol, 5 equiv). Reaction was stirred at r.t. for 5 days. It was then quenched with a few drops of water, followed by a few drops of TFA. Solution was then purified by reverse phase HPLC (10-60% acetonitrile/water/0.05%TFA). Fractions were then combined and concentrated yielding a clear oil which was then washed with saturated sodium bicarbonate and extracted twice with EtOAc. The organic layer was then dried, filtered and concentrated leaving a clear oil. Oil solidified after ~48 hours, yielding a solid white target compound (74.4 mg, 0.200 mmol, 60.7%). <sup>1</sup>H NMR (400 MHz, DMSO-d<sub>6</sub>) δ 8.59 (dq, J=1.0 Hz, 1 H), 7.94 (td, J=7.7, 1.8 Hz, 1 H), 7.63 (dt, J=7.8, 1.1 Hz, 1 H), 7.48 (ddd, J=7.6, 4.9, 1.2 Hz, 1 H), 3.34 - 3.44 (m, 4 H), 3.19 (t, J=1.0 Hz, 2 H), 2.06 - 2.10 (m, 2 H), 1.96 (dt, J=12.5, 6.6 Hz, 2 H), 1.77 - 1.84 (m, 1 H), 1.62 - 1.68 (m, 1 H), 1.52 - 1.62 (m, 1 H), 1.42 (d, J=3.2 Hz, 2 H), 1.09 (t, J=1.0 Hz, 3 H), 0.90 (d, J=6.6 Hz, 6 H). ES-MS m/z 373 (MH<sup>+</sup>).

**3-ethyl-1-(3-methylbutyl)-8-(quinolin-8-ylmethyl)-1,3,8-triazaspiro[4.5]decane-2,4-dione hydrochloride (12s)**. A mixture of **12n** (100.2 mg, 0.33 mmol, 1.0 equiv) and quinolone-8-carboxaldehyde (102.9 mg, 0.655 mmol, 1.985 equiv) was dissolved in DMF (2 mL) and was stirred at room temp for 30 minutes before the addition of sodium triacetoxyborohydride (174.74 mg, 0.824 mmol, 2.5 equiv). After 48 hrs, reaction was quenched with a few drops of water, followed by TFA. The solution was then purified by reverse phase HPLC (10 to 60% acetonitrile/water/0.05%TFA). Fractions were then combined and concentrated, leaving an oily yellowish product. This oil was then washed with saturated sodium bicarbonate and extracted twice with EtOAc. The organic layers were then combined, dried, filtered and concentrated to give a yellow oily product (112.4mg). This oil was then diluted with a minimal amount of diethyl ether and transferred to a 2 dram vial, along with 330 μL of HCl (1 M in diethyl ether). This mixture was slurried for ~30 minutes, then filtered and dried to give the target compound (an off-white solid) as an HCl salt (115.5 mg, 0.260 mmol, 78.7% yield). <sup>1</sup>H NMR (400 MHz, DMSO-d<sub>6</sub>) δ 9.06 (dd, J=4.1, 1.6 Hz, 1 H), 8.52 (dd, J=8.3, 1.7 Hz, 1 H), 8.21 (dd, J=7.1, 1.3 Hz, 1 H), 8.17



(dd, J=8.3, 1.3 Hz, 1 H), 7.75 (dd, J=8.2, 7.2 Hz, 1 H), 7.68 (dd, J=8.3, 4.2 Hz, 1 H), 5.01 (br. s., 2 H), 3.43 - 3.61 (m, 4 H), 3.32 - 3.42 (m, 2 H), 3.17 (t, J=1.0 Hz, 2 H), 2.08 (s, 2 H), 1.92 (d, J=14.7 Hz, 2 H), 1.48 - 1.59 (m, 1 H), 1.41 (d, J=7.9 Hz, 2 H), 1.04 - 1.11 (m, 3 H), 0.88 (d, J=6.4 Hz, 6 H). ES-MS m/z 410 (MH<sup>+</sup>).

**3-ethyl-1-(3-methylbutyl)-8-(pyridin-2-ylmethyl)-1,3,8-triazaspiro[4.5]decane-2,4-dione hydrochloride (12t).** A mixture of **12n** (100 mg, 0.329 mmol, 1.0 equiv) and 2-bromomethyl pyridine hydrobromide (83.25 mg, 0.329 mmol, 1.0 equiv) and potassium carbonate (227.4 mg, 1.646 mmol, 5 equiv) in acetonitrile (2 mL) was stirred at 60 °C in a 2 dram vial for 48 hours. After this time, the reaction mixture was diluted with ethyl acetate and filtered through a syringe filter to remove excess potassium carbonate. The filtrate was then concentrated to yield a dark yellow oil. Next the sample was diluted with DMF (~2mL) and a few drops of TFA were added. The solution was then purified by reverse phase HPLC (10 to 60% acetonitrile/water/0.05% TFA). Fractions were combined and concentrated yielding a light yellow oil. The sample was subsequently washed with saturated sodium bicarbonate and extracted twice with EtOAc. Combined organic layers were dried, filtered and concentrated to give a clear oil (116.6mg). This oil was then diluted with a minimal amount of diethyl ether and transferred to a 2 dram vial, along with 360 µL of HCl (1 M in diethyl ether). This mixture was slurried for ~30 minutes, then filtered through a filter funnel and dried to give the target compound, a white solid precipitate, as an HCl salt (84.5 mg, 0.214 mmol, 65%). <sup>1</sup>H NMR (400 MHz, DMSO-d<sub>6</sub>) δ 8.67 - 8.73 (m, 1 H), 7.95 (td, J=7.7, 1.8 Hz, 1 H), 7.69 (d, J=7.8 Hz, 1 H), 7.51 (ddd, J=7.7, 4.9, 1.1 Hz, 1 H), 4.56 (s, 2 H), 3.51 (t, J=1.0 Hz, 4 H), 3.38 (q, J=7.1 Hz, 2 H), 3.19 (t, J=1.0 Hz, 2 H), 2.08 (s, 2 H), 1.95 (d, J=14.1 Hz, 2 H), 1.56 (spt, J=1.0 Hz, 1 H), 1.45 (q, J=1.0 Hz, 2 H), 1.08 (d, J=1.0 Hz, 3 H), 0.91 (d, J=6.6 Hz, 6 H). ES-MS m/z 360 (MH<sup>+</sup>).

**3-ethyl-8-(1H-indol-7-ylmethyl)-1-(3-methylbutyl)-1,3,8-triazaspiro[4.5]decane-2,4-dione hydrochloride (12u).** A mixture of **12n** (100.5 mg, 0.331 mmol, 1.0 equiv) and 7-formylindole (96.6 mg, 0.665 mmol, 2.012 equiv) was dissolved in DMF (2 mL) and was stirred at room temp for 30 minutes before the addition of sodium triacetoxyborohydride (175.3 mg, 0.827 mmol, 2.5 equiv). After 24 hrs, the reaction was quenched with a few drops of water, followed by TFA. The solution was then purified by reverse phase HPLC (10 to 60% acetonitrile/water/0.05%TFA). The product fraction was concentrated and then washed with sat. sodium bicarbonate and extracted twice with EtOAc. The organic layer was then dried using sodium sulfate, filtered by gravity filtration, and concentrated to yield a red/orange oil. It was then purified by flash chromatography (10-90% EtOAc/heptane) and fractions were combined and concentrated yielding 75.3 mg of a clear, light purple oil. This was then dissolved in a minimal amount of diethyl ether, and 280 µL of HCl (1M in diethyl ether) was added. Solution was slurried for ~30 minutes then filtered and dried to give the target compound, a pink powdery solid, as an HCl salt (46.1 mg, 0.106 mmol, 32.2%). <sup>1</sup>H NMR (400 MHz, DMSO-d<sub>6</sub>) δ 11.66 (br. s., 1 H), 7.68 (d, J=1.0 Hz, 1 H), 7.48 (br. t, J=1.0, 1.0 Hz, 1 H), 7.38 (d, J=1.0 Hz, 1 H), 7.09 (t, J=1.0 Hz, 1 H), 6.53 (br. q, J=1.0, 1.0, 1.0 Hz, 1 H), 4.68 (br. d, J=1.0 Hz, 2 H), 3.52 (br. t, J=1.0, 1.0 Hz, 4 H), 3.37 (q, J=1.0 Hz, 4 H), 3.16 (br. t, J=1.0, 1.0 Hz, 2 H), 1.95 (br. d, J=1.0 Hz, 2 H), 1.54 (spt, J=1.0 Hz, 1 H), 1.41 (br. q, J=1.0, 1.0, 1.0 Hz, 2 H), 1.07 (t, J=1.0 Hz, 3 H), 0.90 (d, J=1.0 Hz, 6 H). ES-MS m/z 397 (MH<sup>+</sup>).

## cLogP Calculations

cLogP values were calculated using the cLogP calculators in ChemDraw Ultra 12.0.

### *In vitro* Antimalarial Assays (3D7 and Dd2)

*P. falciparum* strain 3D7 was cultured according to the method of Trager and Jensen (1976, Science 193:673-675) with minor modifications. Parasites were grown in human erythrocytes (2% hematocrit) in an atmosphere of 5% CO<sub>2</sub>, 5% O<sub>2</sub>, 90% N<sub>2</sub> in RPMI1640 medium (Gibco) supplemented with 25 mM Hepes buffer (Sigma), 25 mg L<sup>-1</sup> gentamicin (Gibco), 1 mM Sodium pyruvate (Sigma), 50 mg L<sup>-1</sup> hypoxanthine (Sigma), 2 g L<sup>-1</sup> glucose (Sigma), 2.52 g L<sup>-1</sup> sodium bicarbonate (Sigma) and 5 g L<sup>-1</sup> Albumax 1 (Gibco). *In vitro* antimalarial activity was determined by the SYBR Green I method described by Smilkstein et al (2004, Antimicrob. Agents Chemother. 48:1803–1806) with modifications (Winter, et al. 2006. Exp. Parasitol. 114:47–56.). Stock solutions of each compound were prepared in DMSO at a concentration of 10 mM and 3-fold serial dilutions prepared in DMSO. Compounds were then diluted 500-fold into culture medium in 96-well storage plates to create 2X drug solutions. Drug solutions (50 µl per well) were transferred in quadruplicate to parasite cultures (50 µl) in 96-well black tissue culture plates for a total volume of 100 µl at 2% hematocrit, 0.5% parasitemia and 0.1% DMSO final concentrations. The plates were then incubated for 72 h at 37 °C. After incubation, 100 µl of lysis buffer containing 0.2 µl ml<sup>-1</sup> SYBR Green I was added to each well.

After incubation for 1 h at room temperature in the dark, plates were read on a Safire2 (Tecan) plate reader with excitation and emission wavelengths of 497 and 520 nm, respectively. The 50% inhibitory concentrations (IC<sub>50</sub>s) were determined by nonlinear regression using a four parameter logistic equation (Graph-Pad Prism software).

Antimalarial potency of compounds was determined by this technique for both *Plasmodium falciparum* 3D7 (CQ-sensitive) and Dd2 (multi-drug resistant) strains.

### Plasmeprin-2 (PM-II; PM-2) and Plasmpesin-4 (PM-IV; PM-4) Enzyme Inhibition Assays

Plasmeprin-2 (PM-2; Plm II) and Plasmeprin-4 (PM-4; Plm IV) expression and purification were performed following the published protocols (Istvan ES and Goldberg DE, 2005). The final purified protein was activated by diluting the protein to 0.3mg/ml in activating buffer (0.1M citrate pH 4.5, 0.1% Tween-20, 50mM dithiothreitol) and incubated at room temperature for 40 min, then the activated enzyme was diluted in assay buffer (50mM sodium acetate pH 4.7, 0.01% Tween-20). The enzymatic inhibition reaction was performed in 384 well plates with a total volume of 20 µl. 10 µl of diluted PM-2 or PM-4 enzyme was added to the 384-well plate except blank wells (blank wells add 10 µL of assay buffer) and 20 nl of serials of diluted 1000 × compounds were added to the wells with 520 Echo® Liquid Handling System (Labcyte Inc.). 10 µl PM-2 peptide substrate (AnaSpec, Cat#, 62050) with assay buffer was then added to final concentration of 20 µM to start the reaction. After incubation the reaction at room temperature for 60 min, the fluorescence intensity at Ex/Em= 360nm/535nm was measured using EnVision multilabel plate reader (Perkin-Elmer). The IC<sub>50</sub> values were obtained using Graph Pad Prism 4.

## **$\beta$ -Secretase (BACE1), Cathepsin D, and Cathepsin E Enzymes Inhibition Assays**

The recombinant human BACE1, Cathepsin D, and Cathepsin E enzymes were purchased from R&D Systems (catalog numbers are 931-AS, 1014AS and 1294AS, respectively). The enzymatic inhibition activities Assays were performed in a 384-well plate format using the fluorescence resonance energy transfer (FRET) assay. The concentration of BACE1 and Cathepsin D were 20 ng/ $\mu$ l, and 1 ng/ $\mu$ l of Cathepsin E was used. BACE1 was activated by incubation in assay buffer (100mM sodium acetate pH 4.0) for 15 min at room temperature; CatD and CatE were activated by incubation in assay buffer (0.1 M NaOAc, 0.2 M NaCl, pH 3.5) at room temperature for 30 min. Subsequently, the rhBACE-1 substrate (R&D Systems, catalog# ES004), the Cathepsin D and Cathepsin E substrate ((R&D Systems, Catalog # ES001) were added accordingly to final concentration 20uM to initiate the reaction. After 60 min incubation at room temperature, the time-resolved fluorescence at Ex/Em= 360nm/460nm was measured on an EnVision multilabel plate reader (Perkin-Elmer). The analytical software, GraphPad Prism 5.0 (GraphPad Software, Inc., USA) was used to generate IC<sub>50</sub> values via non-linear regression analysis.

## **HepG2 Cytotoxicity Assay**

HepG2 cells (ATCC Cat. No. HB-8065) were maintained in DMEM supplemented with 10% fetal bovine serum and L-glutamine. Cells were grown at 37°C and 5% CO<sub>2</sub> on flasks coated with poly-d-lysine. To assess compounds for potential cytotoxic properties cells were plated at 10,000 cells per well on 96-well poly-d-lysine plates at 10,000 cells per well. HepG2 cells were allowed to adhere for at least 4 hours prior to application of test compounds. Cells were incubated with test compounds for 72 hours before measuring cellular viability. Cellular viability was measured using PrestoBlue® Cell Viability Reagent (Life Technologies). Briefly, 11ul of 10X PrestoBlue reagent was added to 100ul in each assay well. Cells were incubated at 37°C and 5% CO<sub>2</sub> for 30 minutes prior to reading on Tecan Safire<sup>2</sup>, excitation at 560nm, 10 nm bandwidth and emission at 590 nm, 10 nm bandwidth. GraphPad Prism 5.0 (GraphPad Software, Inc., USA) was used to generate IC<sub>50</sub> values via non-linear regression analysis.

## **MLM, RLM and HLM Assays**

In this protocol, the metabolic stability of **spiropiperidinehydantoin** compounds at 1  $\mu$ M was determined in mouse liver microsomes (MLM), rat liver microsomes (RLM) or human liver microsomes (HLM). Each test compound was incubated in an aqueous reaction mixture (0.6 mL total volume) consisting of 0.25  $\mu$ M microsomal protein CYP450 activity, 1.2 mM NADPH, 3.3 mM MgCl<sub>2</sub>, and 100 mM potassium phosphate buffer (pH 7.4). After incubation at 37°C for a specific time period (0, 5, 10, 20 and 30 min), a 100- $\mu$ L aliquot of the reaction was transferred to 200  $\mu$ L ice cold acetonitrile containing internal standard (100 ng/mL). The quenched reaction mixtures were centrifuged at 3200 rpm for 5 min, and 100  $\mu$ L of the supernatant were transferred to 96-well plate and analyzed by LC-MS/MS using an Applied Biosystems-Sciex

model API 4000 mass spectrometer. Analyte/internal standard peak area ratios were used to calculate half-life.

### **Rat Pharmacokinetic (PK) Analysis**

Male SD rats, weighing 180-220g (Southern China Medical University, China) were utilized for the studies. The protocol was approved by the Institutional Animal Care and Use Committee at GIBH. Animals were maintained on standard animal chow and water ad libitum, in a climate controlled room ( $23 \pm 1^\circ\text{C}$ , 30 - 70% relative humidity, a minimum of 10 exchanges of room air per hour and a 12-h light/dark cycle) for one week prior to experiments. The test compound was dissolved in suitable solvent. Pharmacokinetic properties were determined following i.v. and oral administration. Animals were randomly distributed into two experimental groups (n = 4). The oral groups were given 5 mg/kg of the test compound by gastric gavage. The other group was dosed by injection into the tail vein (1mg/kg). After single administration, whole blood samples (100-200  $\mu\text{L}$ ) were obtained from the orbital venous plexus at the following time points after dosing: 5, 10, 30 min and 1, 2, 3, 4, 6, 8, 11 and 24 h (p.o.); 2, 10, 30 min and 1, 2, 3, 4, 6, 8, 11 and 24 h (i.v.). Whole blood samples were collected in heparinized tubes. The plasma fraction was immediately separated by centrifugation (8,000 rpm, 6 min,  $4^\circ\text{C}$ ) and stored at  $-20^\circ\text{C}$  until LC-MS analysis. The rats were humanely euthanased by carbon dioxide 24 hours after experiment without pain.

**Plasma sample analysis. Standard curve sample preparation:** The compound was dissolved in DMSO at a concentration of 2mg/ml and diluted with 50% methanol solution to series concentration as follow: 20, 50, 100, 500, 1000, 2000, 4000, 6000, 12000, 40000ng/ml. 10 $\mu\text{l}$  series concentration solution and 50 $\mu\text{l}$  blank plasma were added to 1.5ml tube and vortex for 3min, then 150 $\mu\text{l}$  acetonitrile containing internal standard were added and vortex for 5min, finally spin tube in centrifuge at 16000g for 40min at  $4^\circ\text{C}$ . **Plasma sample preparation:** The plasma samples were prepared using protein precipitation method. 10 $\mu\text{l}$  50% methanol water solution and 50 $\mu\text{l}$  plasma samples were added to 1.5ml tube and vortex for 3min, then 150 $\mu\text{l}$  acetonitrile containing internal standard were added and vortex for 5min, finally spin tube in centrifuge at 16000g for 40min at  $4^\circ\text{C}$ . **LC/MS/MS analysis:** After centrifuge, 100 $\mu\text{l}$  supernatant was transfer to the 96 well plate and analyzed by LC-MS/MS using an Applied Biosystems-Sciex model API 3000 mass spectrometer. The pharmacokinetics parameters were calculated by analyzing the compound concentration in plasma samples using the pharmacokinetic software DAS.2.0

The Institutional Animal Care and Use Committee at the Guangzhou Institutes of Biomedicine and Health, Chinese Academy of Sciences, reviewed and approved the animal use in these studies. The animal care and use program, run entirely according to Association for Assessment and Accreditation of Laboratory Animal Care, International (AAALACi) standards, is applying for AAALACi accreditation. The license for using laboratory animals is issued by Guangdong Laboratory Animal monitoring Institute. The Office of Laboratory Animal Welfare (OLAW) has recently re-activated the Animal Welfare Assurance for this institution (OLAW identification number A5748-01).

# <sup>1</sup>H NMR and LC-MS spectra for compound 4e (CWHM-123)

| Acquisition Time (sec) | 3.9846               | Comment           | MJM-11-036B - HCl salt                      | Date                   | 06 Jan 2012 10:53:20 |
|------------------------|----------------------|-------------------|---------------------------------------------|------------------------|----------------------|
| Date Stamp             | 06 Jan 2012 10:53:20 | File Name         | C:\Users\mmeyers8\Desktop\MJM-11-036B\11fid | Origin                 | spect                |
| Frequency (MHz)        | 400.13               | Nucleus           | <sup>1</sup> H                              | Number of Transients   | 16                   |
| Original Points Count  | 32768                | Owner             | mmeyers8                                    | Points Count           | 131072               |
| Receiver Gain          | 512.00               | SW(cyclical) (Hz) | 8223.88                                     | Solvent                | DMSO-d6              |
| Spectrum Type          | STANDARD             | Sweep Width (Hz)  | 8223.82                                     | Temperature (degree C) | 25.000               |
|                        |                      |                   |                                             | Pulse Sequence         | zg30                 |
|                        |                      |                   |                                             | Spectrum Offset (Hz)   | 2467.5718            |

<sup>1</sup>H NMR (400 MHz, DMSO-d<sub>6</sub>) δ 10.61 (s, 1H), 7.63 (d, *J* = 2.45 Hz, 1H), 7.34 (dd, *J* = 2.73, 8.69 Hz, 1H), 7.00 (d, *J* = 8.85 Hz, 1H), 4.20 - 4.32 (m, 2H), 3.34 - 3.47 (m, 6H), 3.13 - 3.20 (m, 2H), 2.42 - 2.48 (m, 2H), 1.90 - 1.98 (m, 2H), 1.49 - 1.62 (m, 1H), 1.39 - 1.48 (m, 2H), 1.08 (t, *J* = 7.18 Hz, 3H), 0.90 (d, *J* = 6.59 Hz, 6H)

MJM-11-036B.001.esp

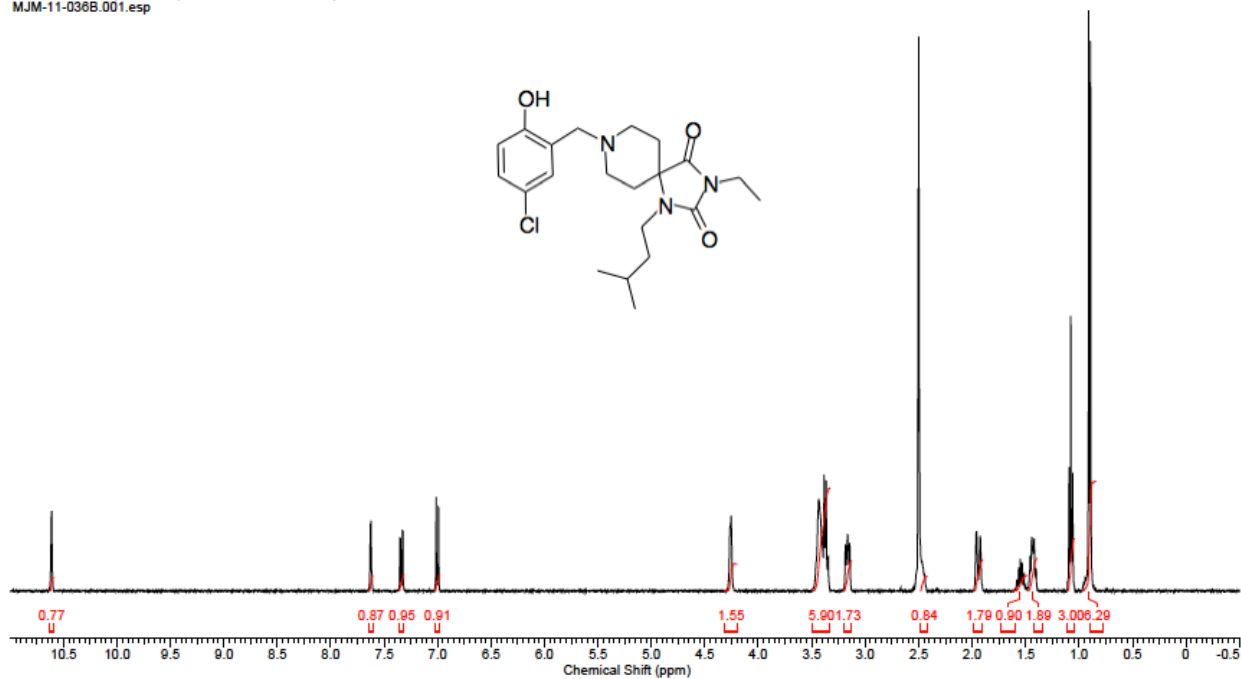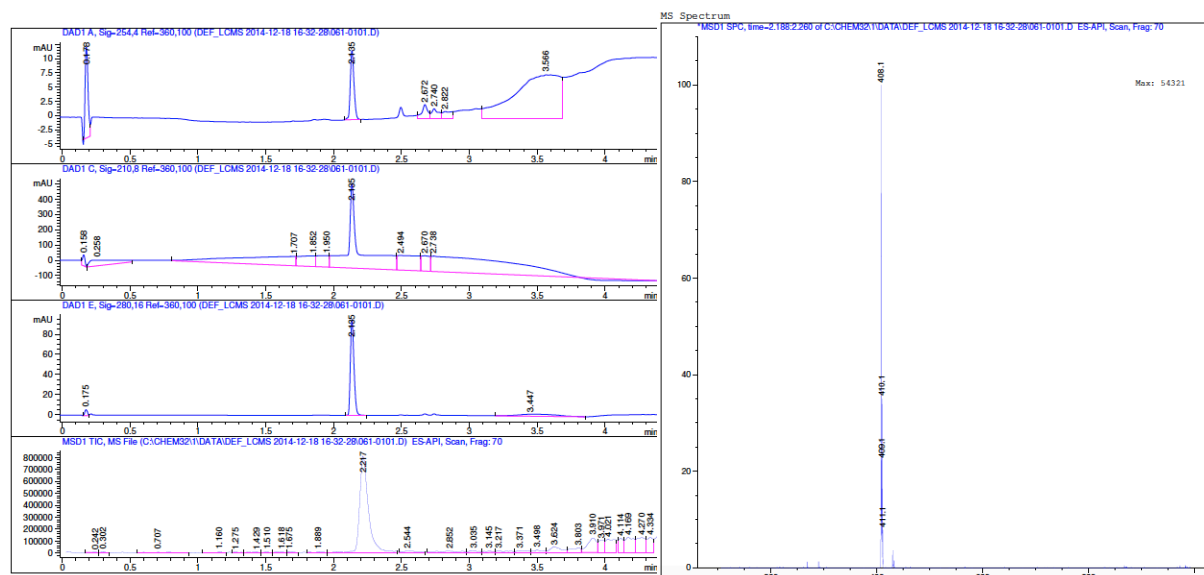

# <sup>1</sup>H NMR spectra for compound 10a

|                                                                         |             |
|-------------------------------------------------------------------------|-------------|
| Formula C <sub>16</sub> H <sub>20</sub> ClN <sub>3</sub> O <sub>2</sub> | FW 337.8013 |
|-------------------------------------------------------------------------|-------------|

|                        |                      |                   |                                                |                        |                      |
|------------------------|----------------------|-------------------|------------------------------------------------|------------------------|----------------------|
| Acquisition Time (sec) | 4.0894               | Comment           | 5 mm PABBO BB-1H/D Z-GRD Z863001/0012          | Date                   | 22 Dec 2014 13:41:52 |
| Date Stamp             | 22 Dec 2014 13:41:52 | File Name         | C:\Users\leander39\Desktop\EJA-14-CB0663\3\fid |                        |                      |
| Frequency (MHz)        | 400.13               | Nucleus           | 1H                                             | Number of Transients   | 16                   |
| Original Points Count  | 32768                | Owner             | nmr                                            | Points Count           | 32768                |
| Receiver Gain          | 812.00               | SW(cyclical) (Hz) | 8012.82                                        | Solvent                | DMSO-d6              |
| Spectrum Type          | STANDARD             | Sweep Width (Hz)  | 8012.58                                        | Temperature (degree C) | 25.000               |
|                        |                      |                   |                                                | Spectrum Offset (Hz)   | 2467.6448            |

<sup>1</sup>H NMR (400 MHz, DMSO-d<sub>6</sub>) δ ppm 1.07 (t, *J*=7.09 Hz, 3 H) 1.84 (q, *J*=14.70 Hz, 2 H) 2.12 (t, *J*=1.00 Hz, 2 H) 3.18 (br. q, *J*=11.00, 11.00, 2 H) 3.38 (t, *J*=1.00 Hz, 2 H) 3.47 (br. q, *J*=11.50, 11.50, 11.50 Hz, 2 H) 4.19 (br. d, *J*=1.00 Hz, 2 H) 6.97 (d, *J*=8.56 Hz, 1 H) 7.34 (d, *J*=2.69 Hz, 1 H) 7.36 (d, *J*=2.69 Hz, 1 H) 7.48 (br. q, *J*=2.70, 2.70, 2.70 Hz, 1 H) 8.97 (s, 1 H)

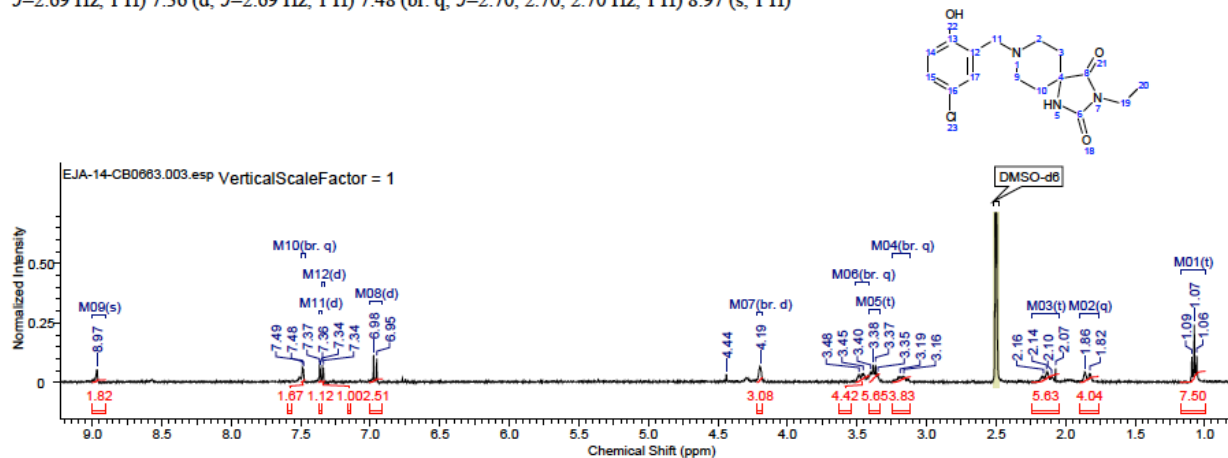

# <sup>1</sup>H NMR spectra for compound 10b

|                                                                         |             |
|-------------------------------------------------------------------------|-------------|
| Formula C <sub>16</sub> H <sub>24</sub> ClN <sub>3</sub> O <sub>2</sub> | FW 365.8545 |
|-------------------------------------------------------------------------|-------------|

|                        |                      |                   |                                                                                                                    |                        |                      |
|------------------------|----------------------|-------------------|--------------------------------------------------------------------------------------------------------------------|------------------------|----------------------|
| Acquisition Time (sec) | 4.0894               | Comment           | 5 mm PABBO BB-1H/D Z-GRD Z863001/0012                                                                              | Date                   | 11 Sep 2013 15:13:52 |
| Date Stamp             | 11 Sep 2013 15:13:52 | File Name         | C:\Documents and Settings\krennin\My Documents\Dropbox\Research Folders\raw NMR data - 9.10.13\TMk-13-CD0223\1\fid |                        |                      |
| Frequency (MHz)        | 400.13               | Nucleus           | 1H                                                                                                                 | Number of Transients   | 16                   |
| Original Points Count  | 32768                | Owner             | nmr                                                                                                                | Points Count           | 32768                |
| Receiver Gain          | 812.00               | SW(cyclical) (Hz) | 8012.82                                                                                                            | Solvent                | DMSO-d6              |
| Spectrum Type          | STANDARD             | Sweep Width (Hz)  | 8012.58                                                                                                            | Temperature (degree C) | 25.000               |
|                        |                      |                   |                                                                                                                    | Spectrum Offset (Hz)   | 2470.9868            |

<sup>1</sup>H NMR (400 MHz, DMSO-d<sub>6</sub>) δ ppm 9.51 (br. s., 1 H), 7.54 (br. s., 1 H), 7.37 (dd, *J*=8.7, 2.3 Hz, 1 H), 6.99 (d, *J*=8.6 Hz, 1 H), 4.30 (br. s., 2 H), 3.46 (br. s., 4 H), 3.40 (q, *J*=7.3 Hz, 4 H), 2.26 (br. s., 2 H), 1.98 (d, *J*=14.7 Hz, 2 H), 1.04 - 1.18 (m, 6 H)

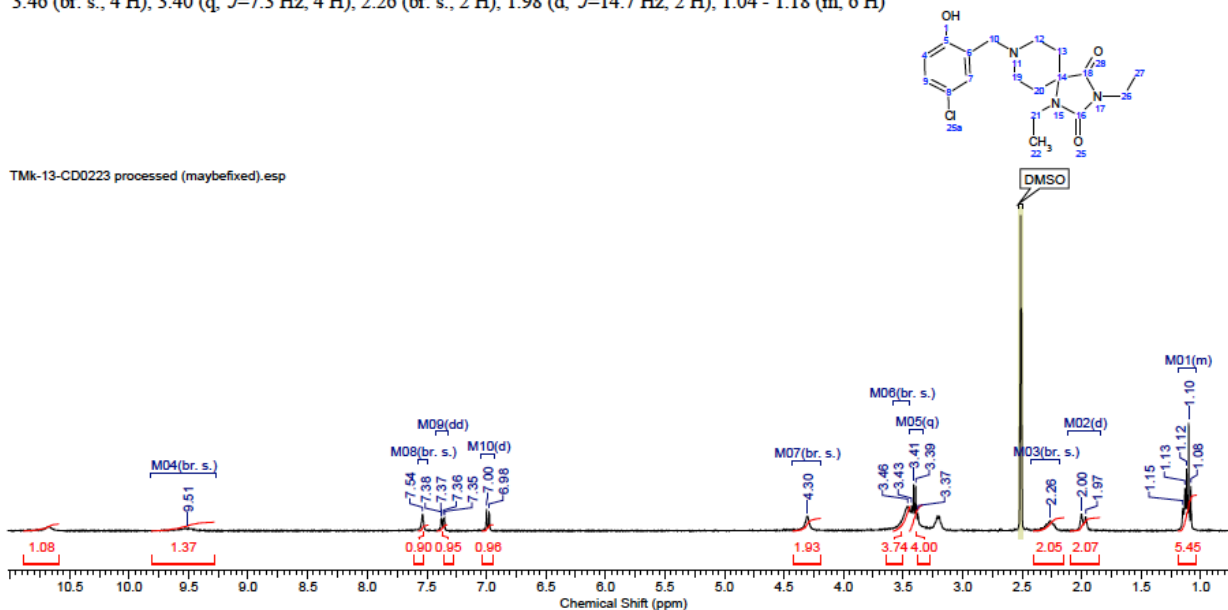

TMk-13-CD0223 processed (maybefixed).esp

# <sup>1</sup>H NMR spectra for compound 10c

|                        |                                                                                                    |                        |                              |
|------------------------|----------------------------------------------------------------------------------------------------|------------------------|------------------------------|
| Formula                | C <sub>21</sub> H <sub>28</sub> ClN <sub>4</sub> O <sub>3</sub>                                    | FW                     | 405.9183                     |
| Acquisition Time (sec) | 3.9846                                                                                             | Comment                | MTM-11-041A/CDCI3/02-13-2012 |
| Date Stamp             | 13 Feb 2012 15:09:20                                                                               | Date                   | 13 Feb 2012 15:09:20         |
| File Name              | \vmware-host\Shared Folders\Documents\CWHM Projects\Notebooks\CWHM-MJM-11\NMR Data\MJM-11-041A\fid |                        |                              |
| Frequency (MHz)        | 400.13                                                                                             | Nucleus                | <sup>1</sup> H               |
| Original Points Count  | 32768                                                                                              | Owner                  | nmr                          |
| Receiver Gain          | 645.00                                                                                             | SW(cyclical) (Hz)      | 8223.68                      |
| Spectrum Type          | STANDARD                                                                                           | Sweep Width (Hz)       | 8223.62                      |
|                        |                                                                                                    | Temperature (degree C) | 25.000                       |
|                        |                                                                                                    | Number of Transients   | 18                           |
|                        |                                                                                                    | Points Count           | 131072                       |
|                        |                                                                                                    | Solvent                | CHLOROFORM-d                 |
|                        |                                                                                                    | Origin                 | spect                        |
|                        |                                                                                                    | Pulse Sequence         | zg30                         |
|                        |                                                                                                    | Spectrum Offset (Hz)   | 2465.0159                    |

<sup>1</sup>H NMR (400 MHz, CHLOROFORM-d) δ 7.19 (dd, *J* = 2.32, 8.47 Hz, 1H), 7.04 (d, *J* = 2.01 Hz, 1H), 6.84 (d, *J* = 8.34 Hz, 1H), 3.87 (s, 2H), 3.41 - 3.56 (m, 4H), 3.01 - 3.21 (m, 2H), 2.05 - 2.21 (m, 2H), 1.85 - 1.97 (m, 3H), 1.75 (d, 5H), 1.51 - 1.64 (m, 3H), 1.20 (t, *J* = 7.18 Hz, 3H)

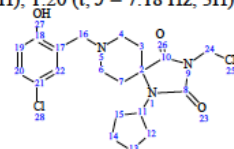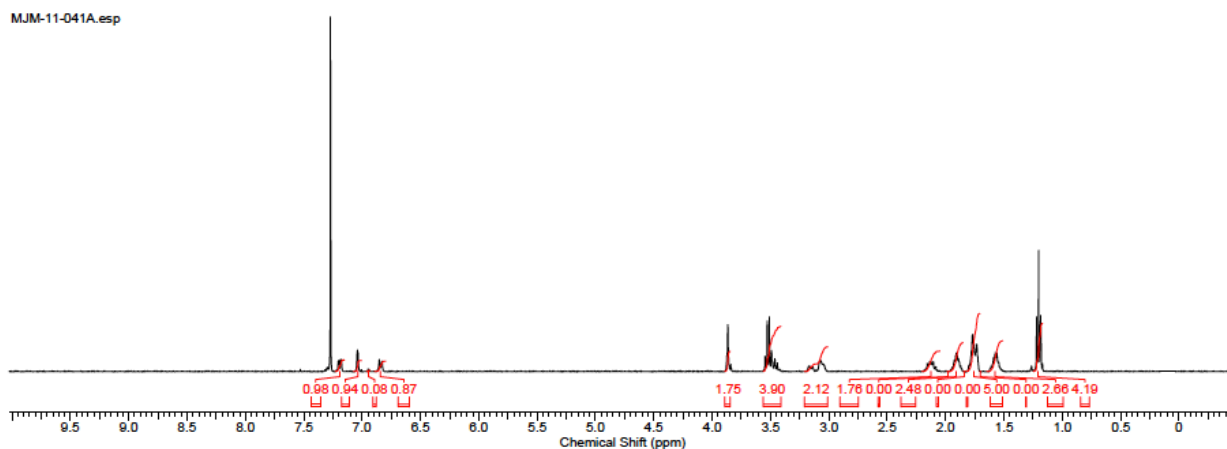

# <sup>1</sup>H NMR spectra for compound 10d

ZWT-052170

7.466  
7.453  
7.433  
7.193  
7.146  
7.093  
6.992  
6.672  
6.650

3.701  
3.664  
3.628  
3.610  
3.042  
3.022  
3.002  
2.998  
2.975  
2.851  
2.832  
1.926  
1.916  
1.284  
1.269

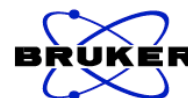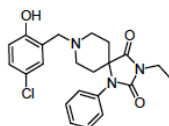

```
NAME          six HMR
EXPNO         5
PROCNO        1
Date_         20150106
Time          1.48
INSTRUM       spect
PROBHD        5 mm DUL 13C-1
PULPROG       zg30
TD            65536
SOLVENT       CDCl3
NS            1
DS            2
SWH           8278.144 Hz
FIDRES        0.126314 Hz
AQ            3.9584243 sec
RG            90.5
DW            60.400 usec
DE            6.50 usec
TE            297.8 K
D1            1.00000000 sec
TD0           1

===== CHANNEL f1 =====
NUC1           1H
P1            12.58 usec
PL1            0.00 dB
PL12          10.87646866 W
SFO1          400.1324710 MHz
SI            32768
SF            400.1300094 MHz
WCM           EM
SGB           0
LB            0.30 Hz
GB            0
PC            1.00
```

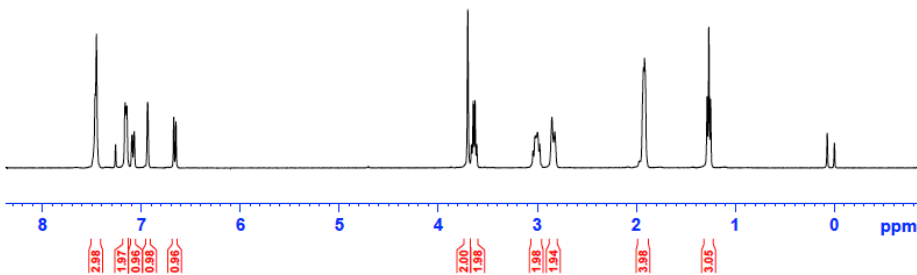

# <sup>1</sup>H NMR spectra for compound 10e

ZWT-052168

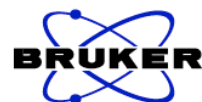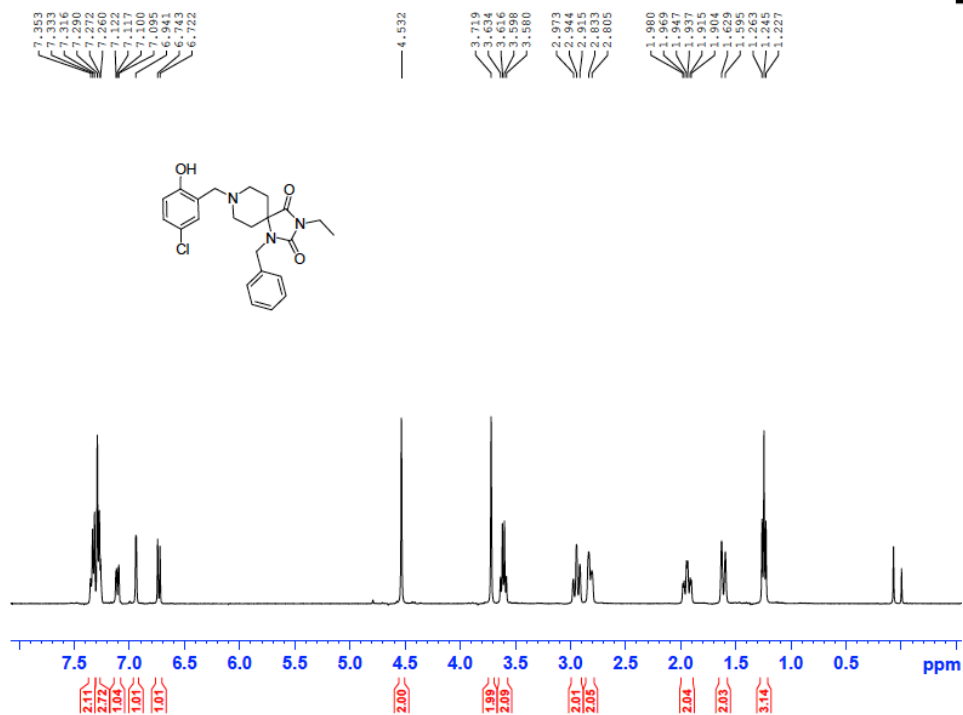

```

NAME          six HMR
EXPNO         4
PROCNO        1
Date_         20150106
Time_         1.43
INSTRUM       spect
PROBHD        5 mm DUL 13C-1
PULPROG       zg30
TD            65536
SOLVENT       CDCl3
NS            1
DS            2
SWH           8278.146 Hz
FIDRES        0.126314 Hz
AQ           3.9584243 sec
RG            90.5
LW           60.400 usec
DE            6.50 usec
TE            297.8 K
D1            1.00000000 sec
TDO           1

===== CHANNEL f1 =====
NUC1          1H
P1            12.58 usec
PL1           0.00 dB
PL1W         10.87646866 W
SFO1         400.1324710 MHz
SI            32768
SF           400.1300093 MHz
WDW           EM
SSB           0
LB            0.30 Hz
GB            0
PC            1.00
    
```

# <sup>1</sup>H NMR spectra for compound 10f

MJM-11-034B - tritirated pdt

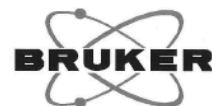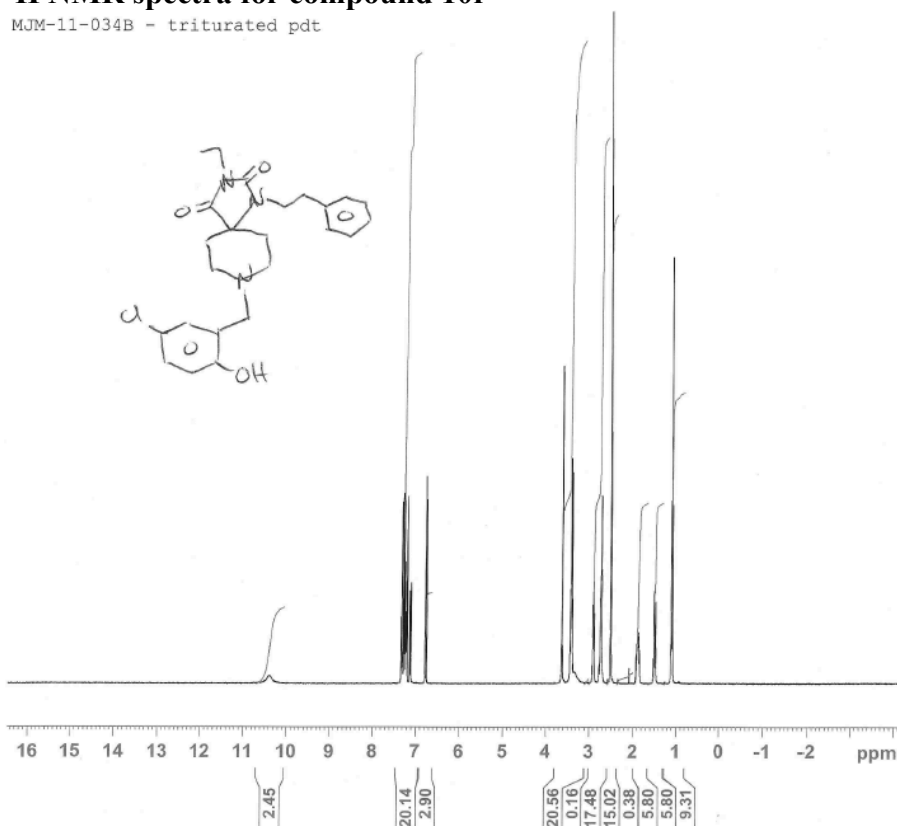

```

NAME          MJM-11-034B
EXPNO         1
PROCNO        1
Date_         20120106
Time_         10.59
INSTRUM       spect
PROBHD        5 mm PABBO BB-
PULPROG       zg30
TD            65536
SOLVENT       DMSO
NS            16
DS            2
SWH           8223.685 Hz
FIDRES        0.125483 Hz
AQ           3.9846387 sec
RG            512
LW           60.800 usec
DE            6.50 usec
TE            298.0 K
D1            1.00000000 sec
TDO           1

===== CHANNEL f1 =====
NUC1          1H
P1            13.75 usec
PL1           0.00 dB
PL1W         11.30348873 W
SFO1         400.1324710 MHz
SI            32768
SF           400.1300000 MHz
WDW           EM
SSB           0
LB            0.30 Hz
GB            0
PC            1.00
    
```



# <sup>1</sup>H NMR spectra for compound 10g

XJ-D49814

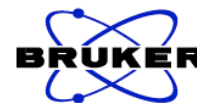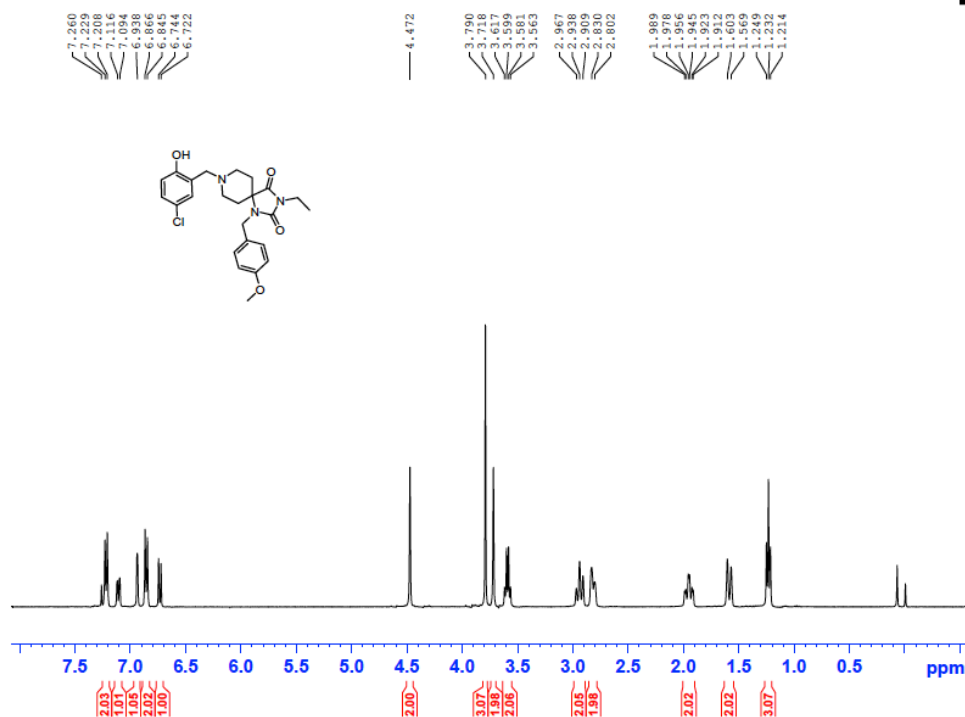

```

NAME          six HMR
EXPNO         2
PROCNO        1
Date_         20150106
Time          1.35
INSTRUM       spect
PROBHD        5 mm DUL 13C-1
PULPROG       zg30
TD            65536
SOLVENT       CDCl3
NS            1
DS            2
SWH           8278.146 Hz
FIDRES       0.126514 Hz
AQ           3.9584243 sec
RG            71.8
AQ           60.400 usec
DE            6.50 usec
TE            297.8 K
D1           1.00000000 sec
TDO           1
===== CHANNEL f1 =====
NUC1          1H
P1            12.58 usec
PL1           0.00 dB
PL1W         10.87646866 W
SFO1         400.1324710 MHz
SI           32768
SF           400.1300094 MHz
WDW           EM
SSB           0
LB            0.30 Hz
GB            0
PC            1.00
    
```

# <sup>1</sup>H NMR spectra for compound 10h

Formula C<sub>18</sub>H<sub>18</sub>ClN<sub>2</sub>O<sub>2</sub> FW 452.9333

| Acquisition Time (sec) | 4.0894               | Comment           | 5 mm PABBO BB-1H/D Z-GRD Z863001/0012         | Date                   | 12 Sep 2014 15:41:36 |
|------------------------|----------------------|-------------------|-----------------------------------------------|------------------------|----------------------|
| Date Stamp             | 12 Sep 2014 15:41:36 | File Name         | C:\Users\leander39\Desktop\EJA-14-CB06426\fid |                        |                      |
| Frequency (MHz)        | 400.13               | Nucleus           | 1H                                            | Number of Transients   | 16                   |
| Original Points Count  | 32768                | Owner             | nmr                                           | Points Count           | 32768                |
| Receiver Gain          | 912.00               | SW(cyclical) (Hz) | 8012.82                                       | Solvent                | DMSO-d6              |
| Spectrum Type          | STANDARD             | Sweep Width (Hz)  | 8012.58                                       | Temperature (degree C) | 25.000               |
|                        |                      |                   |                                               | Pulse Sequence         | zg30                 |
|                        |                      |                   |                                               | Spectrum Offset (Hz)   | 2466.9111            |

<sup>1</sup>H NMR (400 MHz, DMSO-d<sub>6</sub>) δ ppm 1.15 (t, J=7.21 Hz, 3 H) 1.93 - 2.03 (m, 2 H) 2.08 (d, J=7.83 Hz, 2 H) 3.46 (q, J=7.25 Hz, 6 H) 4.26 (br. d, J=1.00 Hz, 2 H) 4.53 (s, 2 H) 6.96 (d, J=8.80 Hz, 1 H) 7.35 (dd, J=8.56, 2.69 Hz, 1 H) 7.44 - 7.57 (m, 3 H) 7.82 (d, J=8.31 Hz, 3 H)

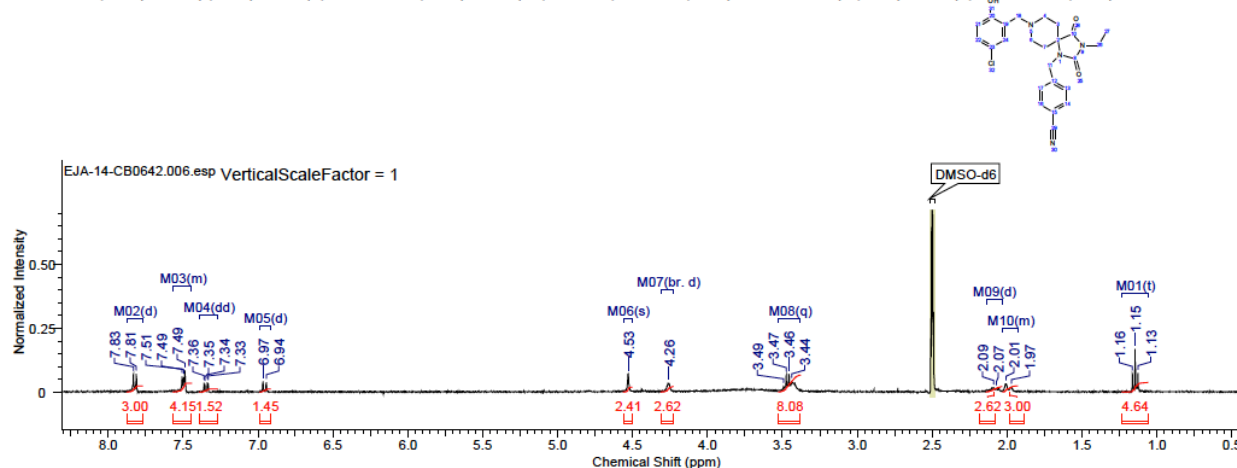

# <sup>1</sup>H NMR spectra for compound 10i

|                                                                                        |                      |                        |                                                |
|----------------------------------------------------------------------------------------|----------------------|------------------------|------------------------------------------------|
| Formula C <sub>24</sub> H <sub>25</sub> ClF <sub>3</sub> N <sub>2</sub> O <sub>2</sub> |                      | FW                     | 495.9218                                       |
| Acquisition Time (sec)                                                                 | 4.0894               | Comment                | 5 mm PABBO BB-1H/D Z-GRD Z863001/0012          |
| Date Stamp                                                                             | 15 Aug 2014 14:58:56 | File Name              | C:\Users\leander39\Desktop\EJA-14-CB0637\37fid |
| Frequency (MHz)                                                                        | 400.13               | Nucleus                | 1H                                             |
| Original Points Count                                                                  | 32788                | Owner                  | nmr                                            |
| Receiver Gain                                                                          | 812.00               | SW(cyclical) (Hz)      | 8012.82                                        |
| Spectrum Type                                                                          | STANDARD             | Solvent                | DMSO-d <sub>6</sub>                            |
|                                                                                        |                      | Sweep Width (Hz)       | 8012.58                                        |
|                                                                                        |                      | Points Count           | 32788                                          |
|                                                                                        |                      | Temperature (degree C) | 25.000                                         |
|                                                                                        |                      | Pulse Sequence         | zg30                                           |
|                                                                                        |                      | Spectrum Offset (Hz)   | 2470.9666                                      |

<sup>1</sup>H NMR (400 MHz, DMSO-d<sub>6</sub>) δ ppm 1.05 - 1.22 (m, 3 H) 1.96 (d, J=14.43 Hz, 2 H) 2.27 - 2.43 (m, 2 H) 3.28 - 3.60 (m, 6 H) 4.24 (br. s., 2 H) 4.56 (s, 2 H) 6.98 (d, J=8.56 Hz, 1 H) 7.34 (dd, J=8.68, 2.57 Hz, 1 H) 7.53 - 7.65 (m, 3 H) 7.71 (d, J=8.31 Hz, 2 H) 10.59 (s, 1 H)

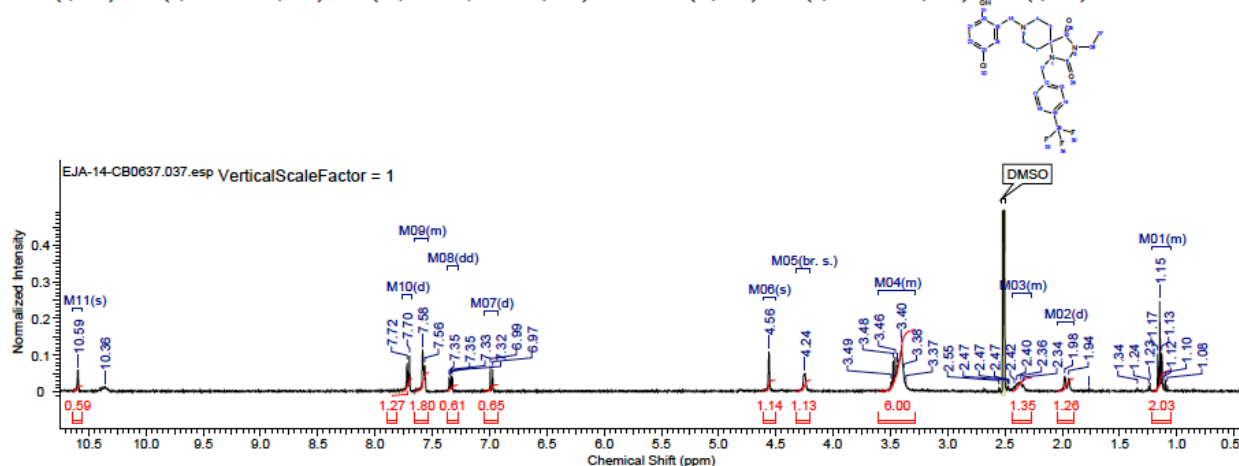

# <sup>1</sup>H NMR spectra for compound 11a

XJ-D49820

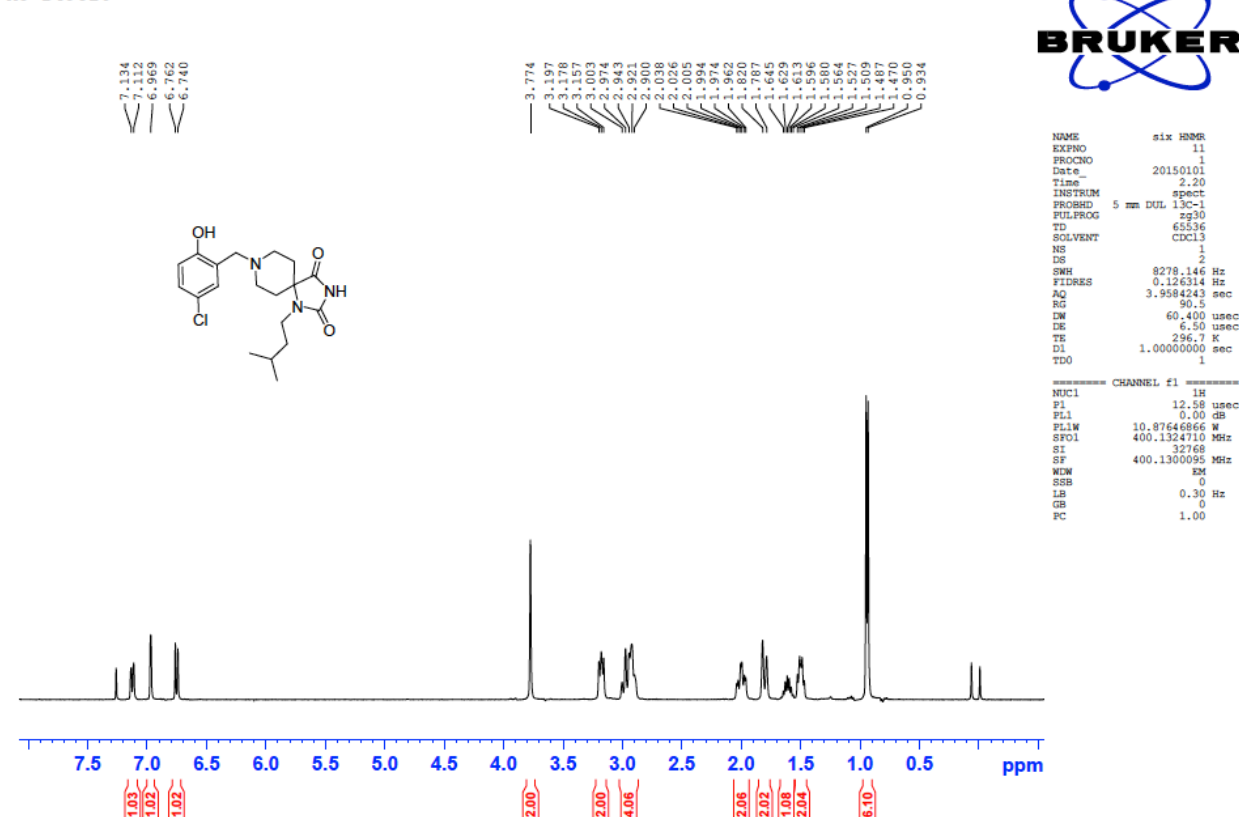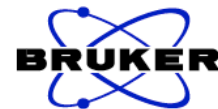

```

NAME          six HMR
EXPNO         11
PROCNO        1
Date_         20150101
Time          2.20
INSTRUM       spect
PROBHD        5 mm DUL 13C-1
PULPROG       zg30
TD            65536
SOLVENT       CDCl3
NS            1
DS            2
SWH           9278.146 Hz
FIDRES        0.126314 Hz
AQ           3.9584243 sec
RG            90.5
DE           60.400 usec
TE            296.7 K
DI            1.00000000 sec
TDO           1
  
```

```

===== CHANNEL f1 =====
NUC1          1H
P1            12.56 usec
PL1           0.00 dB
PL1W          10.87646866 W
SF01          400.1324710 MHz
SI            32768
SF            400.1300095 MHz
WDW           EM
SSB           0
LB            0.30 Hz
GB            0
PC            1.00
  
```

# <sup>1</sup>H NMR spectra for compound 11b

XJ-D49819

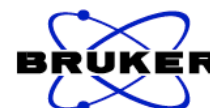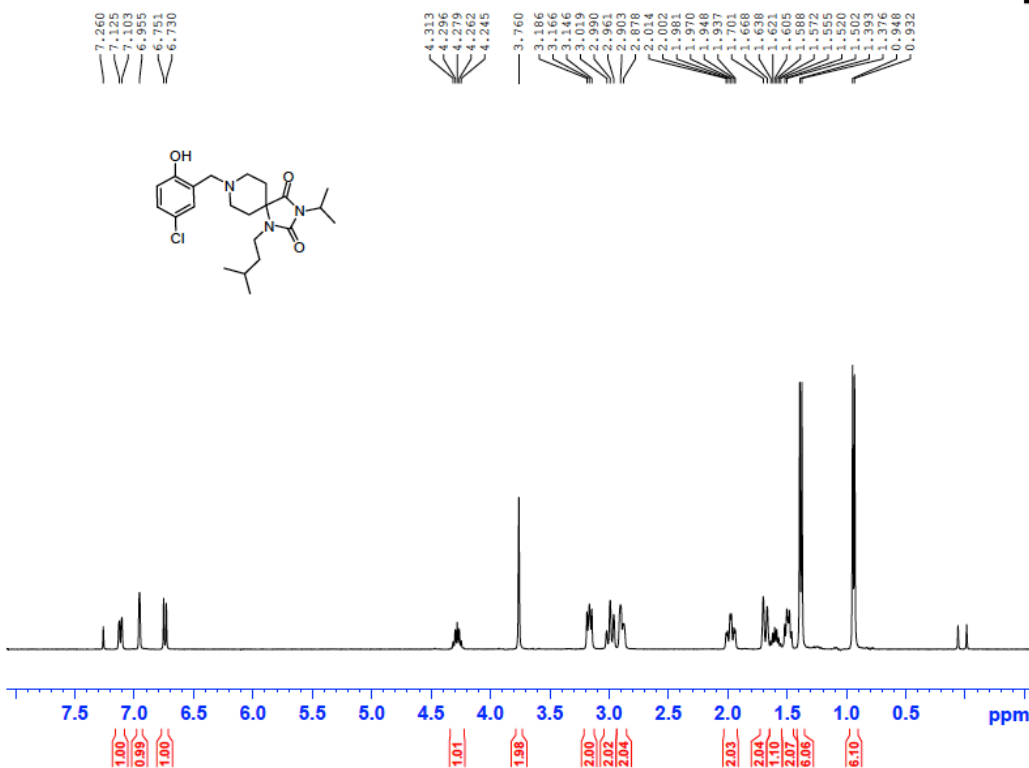

```

NAME          six HMR
EXPNO         3
PROCNO        1
Date_         20150106
Time          1.40
INSTRUM       spect
PROBHD        5 mm DUL 13C-1
PULPROG       zg30
TD            65536
SOLVENT       CDCl3
NS            1
DS            2
SWH           8278.146 Hz
FIDRES       0.126314 Hz
AQ           3.9584243 sec
RG           71.8
DM           60.400 usec
DE           6.50 usec
TE           297.8 K
D1           1.0000000 sec
TD0          1
----- CHANNEL f1 -----
NUC1          1H
P1           12.58 usec
PL1          0.00 dB
PL12         10.8764686 dB
SFO1         400.1324710 MHz
SI           32768
SF           400.1300094 MHz
WDW          EM
SSB          0
LB           0.30 Hz
GB           1
PC           1.00
    
```

# <sup>1</sup>H NMR spectra for compound 12a

Formula C<sub>18</sub>H<sub>26</sub>ClN<sub>2</sub>O<sub>2</sub> FW 407.9342

| Acquisition Time (sec) | 4.0894               | Comment           | 5 mm PABBO BB-1H/D Z-GRD Z863001/0012           | Date                   | 15 Aug 2014 14:50:24 |
|------------------------|----------------------|-------------------|-------------------------------------------------|------------------------|----------------------|
| Date Stamp             | 15 Aug 2014 14:50:24 | File Name         | C:\Users\leander39\Desktop\EJA-14-CB0635\35\fid |                        |                      |
| Frequency (MHz)        | 400.13               | Nucleus           | 1H                                              | Number of Transients   | 16                   |
| Original Points Count  | 32768                | Owner             | nmr                                             | Points Count           | 32768                |
| Receiver Gain          | 812.00               | SW(cyclical) (Hz) | 8012.82                                         | Solvent                | DMSO-d6              |
| Spectrum Type          | STANDARD             | Sweep Width (Hz)  | 8012.58                                         | Temperature (degree C) | 25.000               |
|                        |                      |                   |                                                 | Pulse Sequence         | zg30                 |
|                        |                      |                   |                                                 | Spectrum Offset (Hz)   | 2470.9686            |

<sup>1</sup>H NMR (400 MHz, DMSO-d<sub>6</sub>) δ ppm 0.91 (d, J=6.60 Hz, 6 H) 1.09 (t, J=7.21 Hz, 3 H) 1.38 - 1.50 (m, 2 H) 1.55 (d, J=6.85 Hz, 2 H) 1.96 (d, J=14.67 Hz, 2 H) 2.35 - 2.48 (m, 2 H) 3.10 - 3.24 (m, 2 H) 3.37 - 3.48 (m, 4 H) 4.32 (d, J=4.89 Hz, 2 H) 6.88 - 6.95 (m, 1 H) 7.00 (s, 1 H) 7.20 (s, 1 H) 10.28 (s, 1 H)

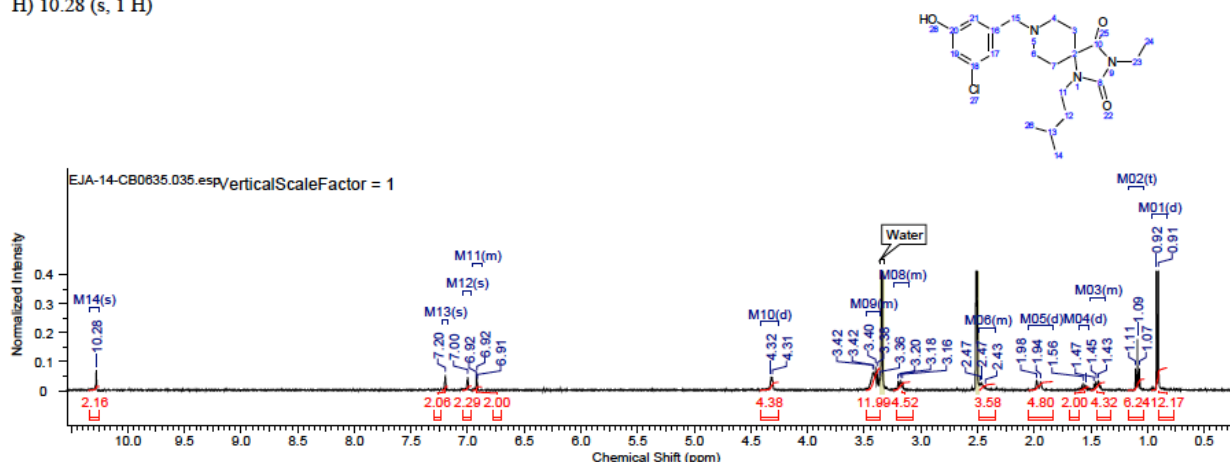

# <sup>1</sup>H NMR spectra for compound 12b

| Formula C <sub>14</sub> H <sub>12</sub> ClN <sub>2</sub> O |                      | FW 407.9342            |                                                |
|------------------------------------------------------------|----------------------|------------------------|------------------------------------------------|
| Acquisition Time (sec)                                     | 4.0894               | Comment                | 5 mm PABBO BB-1H/D Z-GRD Z863001/0012          |
| Date Stamp                                                 | 01 Nov 2013 14:31:12 | File Name              | C:\Users\leander39\Desktop\TMK-13-CD0233\1\fid |
| Frequency (MHz)                                            | 400.13               | Nucleus                | 1H                                             |
| Original Points Count                                      | 32768                | Number of Transients   | 16                                             |
| Receiver Gain                                              | 812.00               | Points Count           | 32768                                          |
| Spectrum Type                                              | STANDARD             | Solvent                | DMSO-d6                                        |
|                                                            |                      | Sweep Width (Hz)       | 8012.58                                        |
|                                                            |                      | Temperature (degree C) | 26.900                                         |
|                                                            |                      | Pulse Sequence         | zg30                                           |
|                                                            |                      | Spectrum Offset (Hz)   | 2462.9924                                      |

<sup>1</sup>H NMR (400 MHz, DMSO-*d*<sub>6</sub>) δ ppm 0.89 (t, *J*=7.09 Hz, 6 H) 1.07 (d, *J*=7.09 Hz, 3 H) 1.42 (br. s., 2 H) 1.55 (d, *J*=5.38 Hz, 1 H) 1.94 (d, *J*=9.05 Hz, 2 H) 3.17 (br. s., 3 H) 3.23 - 3.49 (m, 6 H) 4.27 (br. s., 2 H) 7.03 (d, *J*=7.34 Hz, 1 H) 7.37 (br. s., 1 H) 7.65 (br. s., 1 H) 10.45 (br. s., 1 H) 10.61 (br. s., 1 H)

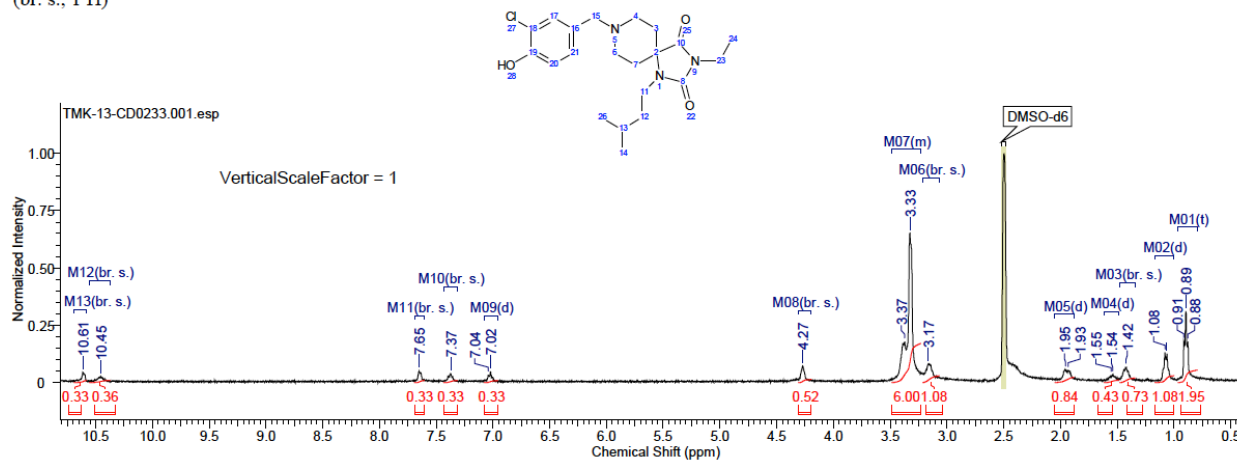

# <sup>1</sup>H NMR spectra for compound 12c

| Formula C <sub>14</sub> H <sub>14</sub> FN <sub>2</sub> O |                      | FW 391.4796            |                                                               |
|-----------------------------------------------------------|----------------------|------------------------|---------------------------------------------------------------|
| Acquisition Time (sec)                                    | 4.0894               | Comment                | 5 mm PABBO BB-1H/D Z-GRD Z863001/0012                         |
| Date Stamp                                                | 11 Sep 2013 15:03:12 | File Name              | C:\Users\tkrennin\Downloads\TMK-13-CD0229\TMK-13-CD0229\1\fid |
| Frequency (MHz)                                           | 400.13               | Nucleus                | 1H                                                            |
| Original Points Count                                     | 32768                | Number of Transients   | 16                                                            |
| Receiver Gain                                             | 812.00               | Points Count           | 32768                                                         |
| Spectrum Type                                             | STANDARD             | Solvent                | DMSO-d6                                                       |
|                                                           |                      | Sweep Width (Hz)       | 8012.58                                                       |
|                                                           |                      | Temperature (degree C) | 25.000                                                        |
|                                                           |                      | Pulse Sequence         | zg30                                                          |
|                                                           |                      | Spectrum Offset (Hz)   | 2465.1931                                                     |

<sup>1</sup>H NMR (400 MHz, DMSO-*d*<sub>6</sub>) δ ppm 0.80 - 0.98 (m, 6 H) 1.00 - 1.17 (m, 3 H) 1.42 (d, *J*=8.07 Hz, 2 H) 1.55 (dt, *J*=13.14, 6.51 Hz, 1 H) 1.96 (br. s., 2 H) 2.45 (br. s., 2 H) 3.17 (d, *J*=7.58 Hz, 2 H) 3.34 - 3.50 (m, 5 H) 4.26 (br. s., 2 H) 6.97 (dd, *J*=8.93, 4.77 Hz, 1 H) 7.15 (td, *J*=8.50, 3.30 Hz, 1 H) 7.41 (d, *J*=9.05 Hz, 1 H) 10.27 (s, 1 H) 10.55 (br. s., 1 H)

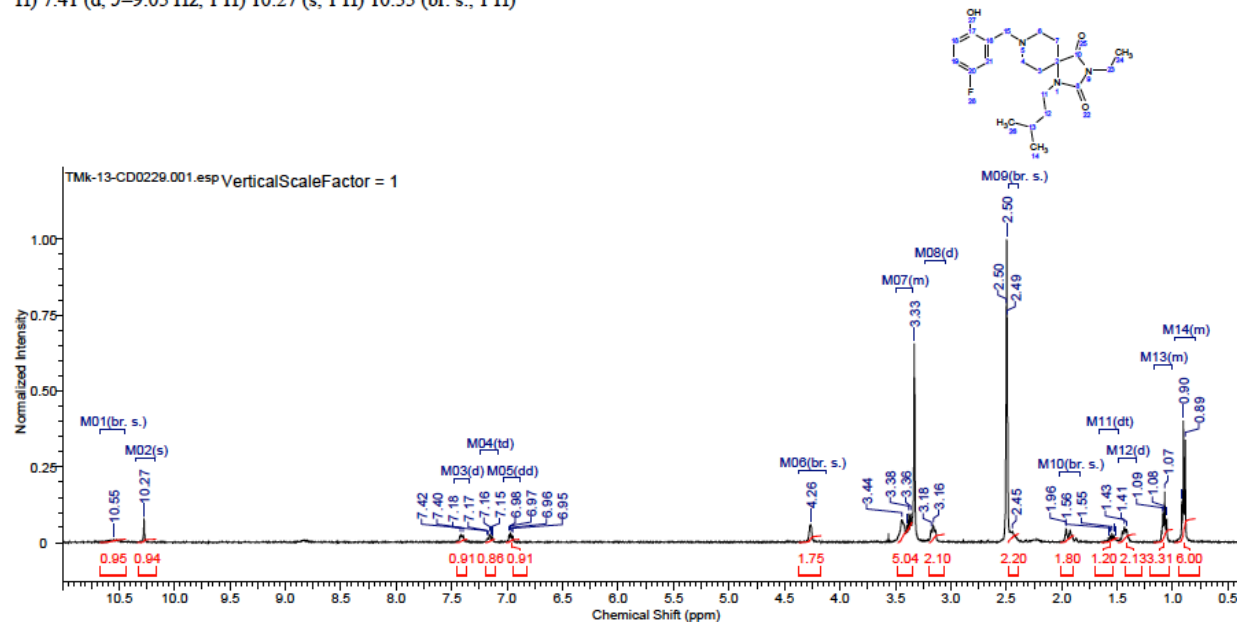

# <sup>1</sup>H NMR spectra for compound 12d

|                        |                                                                            |                        |                      |
|------------------------|----------------------------------------------------------------------------|------------------------|----------------------|
| Formula                | C <sub>21</sub> H <sub>26</sub> BrN <sub>4</sub> O                         | FW                     | 452.3852             |
| Acquisition Time (sec) | 3.9846                                                                     | Comment                | SAM-12-BI5608 HCl    |
| Date Stamp             | 26 Oct 2012 14:14:08                                                       | Date                   | 26 Oct 2012 14:14:08 |
| File Name              | C:\Users\Sarah\Documents\Data\smcnitt\exp\SAM-12-BI5608 raw NMR data\1\fid | Frequency (MHz)        | 400.13               |
| Nucleus                | 1H                                                                         | Number of Transients   | 16                   |
| Owner                  | smcnitt                                                                    | Points Count           | 131072               |
| SW(cyclical) (Hz)      | 8223.68                                                                    | Solvent                | DMSO-d6              |
| Sweep Width (Hz)       | 8223.62                                                                    | Temperature (degree C) | 20.300               |
|                        |                                                                            | Origin                 | spect                |
|                        |                                                                            | Pulse Sequence         | zg30                 |
|                        |                                                                            | Spectrum Offset (Hz)   | 2467.5718            |
|                        |                                                                            | Original Points Count  | 32768                |
|                        |                                                                            | Receiver Gain          | 512.00               |
|                        |                                                                            | Spectrum Type          | STANDARD             |

<sup>1</sup>H NMR (400 MHz, DMSO-*d*<sub>6</sub>) δ ppm 10.68 (s, 1 H), 10.39 (br. s., 1 H), 7.71 (d, *J*=2.6 Hz, 1 H), 7.46 (dd, *J*=8.8, 2.6 Hz, 1 H), 6.95 (d, *J*=8.8 Hz, 1 H), 4.27 (s, 2 H), 3.44 (br. s., 4 H), 3.37 (q, *J*=7.2 Hz, 2 H), 3.15 (t, *J*=1.0 Hz, 2 H), 2.35 - 2.46 (m, 2 H), 1.96 (d, *J*=14.0 Hz, 2 H), 1.54 (spt, *J*=1.0 Hz, 1 H), 1.42 (q, *J*=1.0 Hz, 2 H), 1.08 (t, *J*=7.2 Hz, 3 H), 0.90 (d, *J*=6.6 Hz, 6 H)

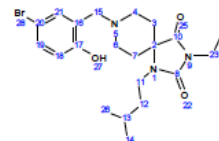

SAM-12-BI5608 raw NMR data.001.esp

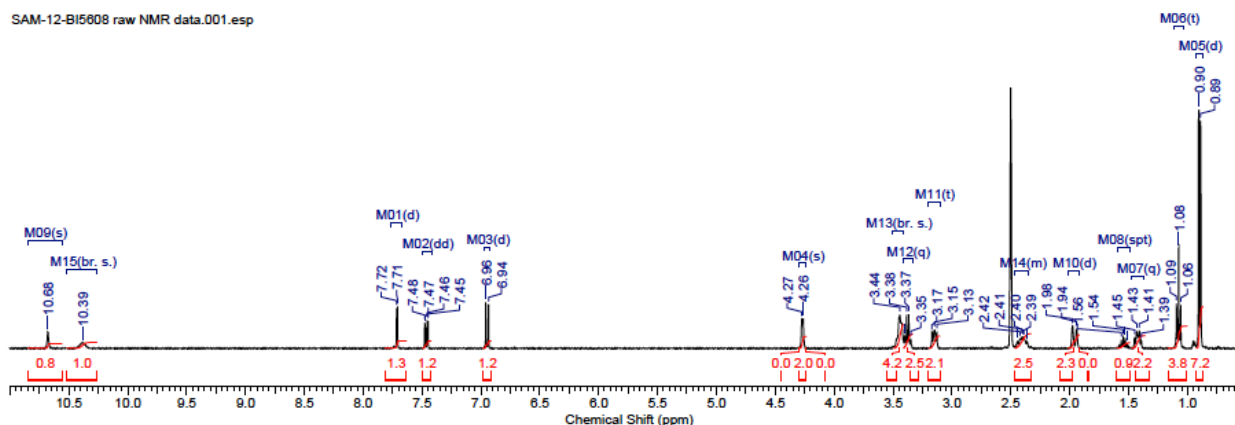

# <sup>1</sup>H NMR spectra for compound 12e

|                        |                                                             |                        |                      |
|------------------------|-------------------------------------------------------------|------------------------|----------------------|
| Formula                | C <sub>22</sub> H <sub>28</sub> N <sub>4</sub> O            | FW                     | 387.5157             |
| Acquisition Time (sec) | 3.9846                                                      | Comment                | SAM-16-011C HCl salt |
| Date Stamp             | 24 May 2012 12:55:12                                        | Date                   | 24 May 2012 12:55:12 |
| File Name              | C:\Users\Sarah\Documents\Data\smcnitt\exp\SAM-16-011C\1\fid | Frequency (MHz)        | 400.13               |
| Nucleus                | 1H                                                          | Number of Transients   | 16                   |
| Owner                  | smcnitt                                                     | Points Count           | 131072               |
| SW(cyclical) (Hz)      | 8223.68                                                     | Solvent                | DMSO-d6              |
| Sweep Width (Hz)       | 8223.62                                                     | Temperature (degree C) | 25.000               |
|                        |                                                             | Origin                 | spect                |
|                        |                                                             | Pulse Sequence         | zg30                 |
|                        |                                                             | Spectrum Offset (Hz)   | 2467.4465            |
|                        |                                                             | Original Points Count  | 32768                |
|                        |                                                             | Receiver Gain          | 645.00               |

<sup>1</sup>H NMR (400 MHz, DMSO-*d*<sub>6</sub>) δ ppm 9.99 (s, 1 H), 7.27 (s, 1 H), 7.10 (d, *J*=1.0 Hz, 1 H), 6.86 (d, *J*=8.2 Hz, 1 H), 4.24 (d, *J*=4.6 Hz, 2 H), 3.40 - 3.49 (m, 4 H), 3.38 (d, *J*=7.2 Hz, 2 H), 3.15 (t, *J*=1.0 Hz, 2 H), 2.32 - 2.44 (m, 2 H), 2.22 (s, 3 H), 1.95 (d, *J*=13.9 Hz, 2 H), 1.54 (spt, *J*=1.0 Hz, 1 H), 1.42 (q, *J*=1.0 Hz, 2 H), 1.08 (t, *J*=7.2 Hz, 3 H), 0.90 (d, *J*=6.6 Hz, 6 H)

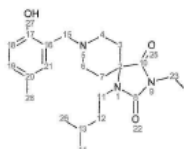

SAM-16-011C nmr analysis.esp

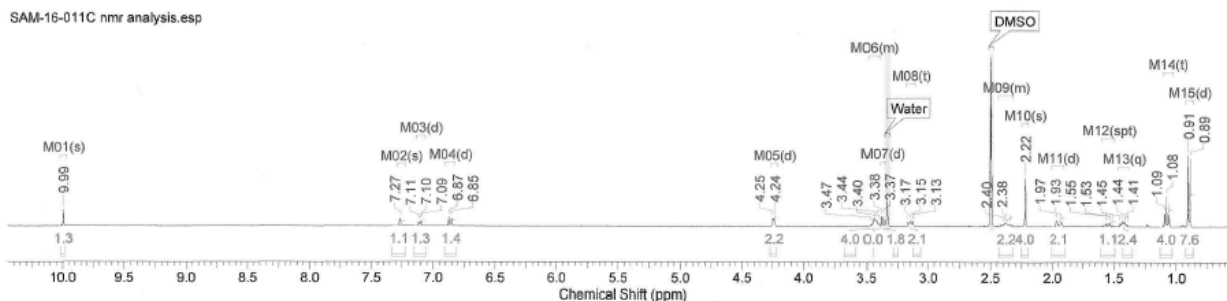

# <sup>1</sup>H NMR spectra for compound 12f

|                        |                                                               |                        |                                              |
|------------------------|---------------------------------------------------------------|------------------------|----------------------------------------------|
| Formula                | C <sub>27</sub> H <sub>36</sub> N <sub>9</sub> O <sub>3</sub> | FW                     | 449.5851                                     |
| Acquisition Time (sec) | 3.9846                                                        | Comment                | SAM-16-003 - final pdt HCl salt              |
| Date Stamp             | 07 Feb 2012 11:25:20                                          | File Name              | C:\Users\Sarah\Documents\NMR\SAM-16-003\1fid |
| Frequency (MHz)        | 400.13                                                        | Nucleus                | 1H                                           |
| Original Points Count  | 32768                                                         | Owner                  | smcnl1                                       |
| Receiver Gain          | 406.00                                                        | SW(cyclical) (Hz)      | 8223.68                                      |
| Spectrum Type          | STANDARD                                                      | Sweep Width (Hz)       | 8223.62                                      |
|                        |                                                               | Solvent                | DMSO-d6                                      |
|                        |                                                               | Temperature (degree C) | 19.400                                       |
|                        |                                                               | Points Count           | 131072                                       |
|                        |                                                               | Number of Transients   | 16                                           |
|                        |                                                               | Pulse Sequence         | zg30                                         |
|                        |                                                               | Spectrum Offset (Hz)   | 2470.9683                                    |

<sup>1</sup>H NMR (400 MHz, DMSO-*d*<sub>6</sub>) δ ppm 0.90 (d, *J*=6.53 Hz, 6 H) 1.09 (t, *J*=1.00 Hz, 3 H) 1.39 - 1.48 (m, 2 H) 1.49 - 1.61 (m, 1 H) 1.95 (d, *J*=13.61 Hz, 2 H) 2.53 - 2.61 (m, 2 H) 3.14 - 3.23 (m, 2 H) 3.35 - 3.42 (m, 4 H) 3.49 (br. s., 2 H) 4.33 (d, *J*=1.00 Hz, 2 H) 7.07 (d, *J*=8.47 Hz, 1 H) 7.28 - 7.35 (m, 1 H) 7.44 (t, *J*=7.69 Hz, 2 H) 7.62 (dd, *J*=8.47, 2.26 Hz, 1 H) 7.69 (d, *J*=7.34 Hz, 2 H) 7.92 (d, *J*=1.69 Hz, 1 H) 10.41 - 10.49 (m, 1 H)

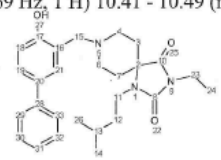

SAM-16-003.001.esp

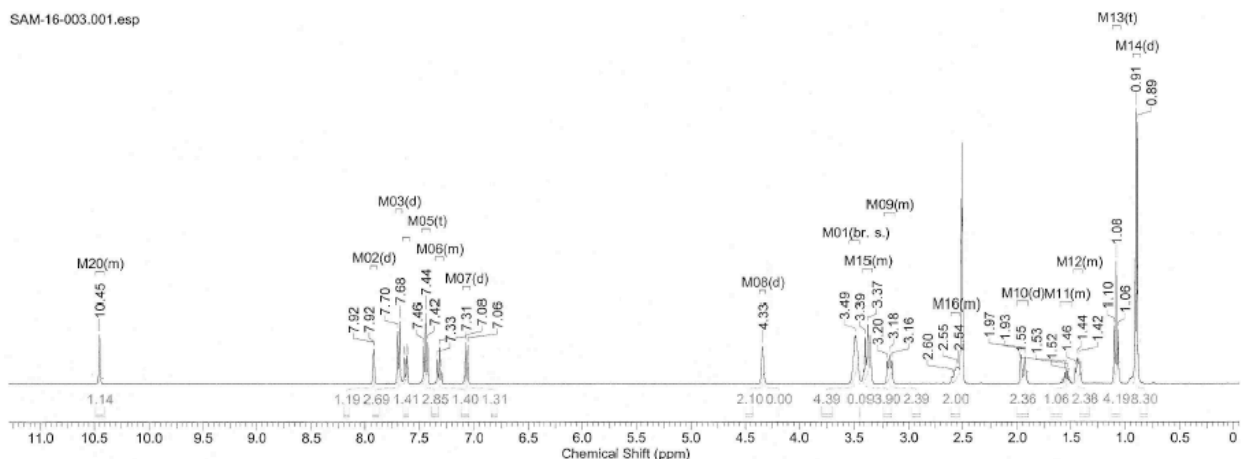

# <sup>1</sup>H NMR spectra for compound 12g

|                        |                                                               |                        |                                                             |
|------------------------|---------------------------------------------------------------|------------------------|-------------------------------------------------------------|
| Formula                | C <sub>27</sub> H <sub>36</sub> N <sub>9</sub> O <sub>3</sub> | FW                     | 407.9342                                                    |
| Acquisition Time (sec) | 4.0894                                                        | Comment                | 5 mm PABBO BB-1H/D Z-GRD Z863001/0012                       |
| Date Stamp             | 01 Nov 2013 14:56:48                                          | File Name              | C:\Users\leander39\Desktop\NMR (11.1.13)\EJA-13-CB0608\1fid |
| Frequency (MHz)        | 400.13                                                        | Nucleus                | 1H                                                          |
| Original Points Count  | 32768                                                         | Owner                  | nmr                                                         |
| Receiver Gain          | 203.00                                                        | SW(cyclical) (Hz)      | 8012.82                                                     |
| Spectrum Type          | STANDARD                                                      | Sweep Width (Hz)       | 8012.58                                                     |
|                        |                                                               | Solvent                | DMSO-d6                                                     |
|                        |                                                               | Temperature (degree C) | 25.000                                                      |
|                        |                                                               | Points Count           | 32768                                                       |
|                        |                                                               | Number of Transients   | 32                                                          |
|                        |                                                               | Pulse Sequence         | zg30                                                        |
|                        |                                                               | Spectrum Offset (Hz)   | 2470.9686                                                   |

<sup>1</sup>H NMR (400 MHz, DMSO-*d*<sub>6</sub>) δ ppm 0.81 - 0.98 (m, 6 H) 1.08 (t, *J*=7.21 Hz, 3 H) 1.35 - 1.65 (m, 3 H) 1.95 (d, *J*=13.69 Hz, 2 H) 2.40 - 2.67 (m, 2 H) 3.00 - 3.28 (m, 2 H) 4.40 (br. s., 4 H) 6.92 - 7.18 (m, 4 H) 7.23 - 7.55 (m, 2 H) 10.18 (br. s., 1 H) 11.11 (br. s., 1 H)

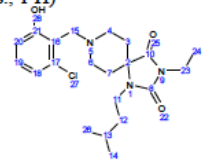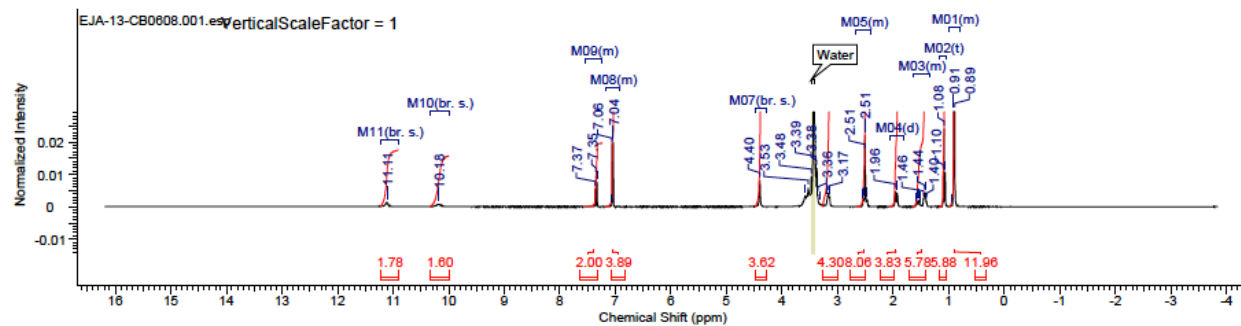

# <sup>1</sup>H NMR spectra for compound 12h

|                                                                        |                                                                 |                        |                                       |
|------------------------------------------------------------------------|-----------------------------------------------------------------|------------------------|---------------------------------------|
| Formula C <sub>21</sub> H <sub>26</sub> N <sub>10</sub> O <sub>5</sub> |                                                                 | FW 407.9342            |                                       |
| Acquisition Time (sec)                                                 | 4.0894                                                          | Comment                | 5 mm PABBO BB-1H/D Z-GRD Z863001/0012 |
| Date Stamp                                                             | 02 Aug 2013 15:05:20                                            | Date                   | 02 Aug 2013 15:05:20                  |
| File Name                                                              | C:\Documents and Settings\tkrennin\Desktop\EJA-13-CB0614\06.fid |                        |                                       |
| Frequency (MHz)                                                        | 400.13                                                          | Nucleus                | <sup>1</sup> H                        |
| Original Points Count                                                  | 32768                                                           | Number of Transients   | 16                                    |
| Receiver Gain                                                          | 724.00                                                          | Origin                 | spect                                 |
| Spectrum Type                                                          | STANDARD                                                        | Points Count           | 32768                                 |
|                                                                        |                                                                 | Pulse Sequence         | zg30                                  |
|                                                                        |                                                                 | Solvent                | DMSO-d6                               |
|                                                                        |                                                                 | Spectrum Offset (Hz)   | 2470.9666                             |
|                                                                        |                                                                 | SW(cyclical) (Hz)      | 8012.82                               |
|                                                                        |                                                                 | Sweep Width (Hz)       | 8012.58                               |
|                                                                        |                                                                 | Temperature (degree C) | 22.900                                |

<sup>1</sup>H NMR (400 MHz, DMSO-*d*<sub>6</sub>) δ ppm 10.43 (s, 1 H), 10.15 (d, *J*=0.7 Hz, 1 H), 7.77 (d, *J*=8.8 Hz, 1 H), 7.62 (d, *J*=8.6 Hz, 2 H), 6.83 - 7.01 (m, 4 H), 4.40 (d, *J*=4.2 Hz, 1 H), 3.28 - 3.55 (m, 4 H), 3.07 - 3.22 (m, 2 H), 1.98 (d, *J*=13.4 Hz, 2 H), 1.50 - 1.60 (m, 1 H), 1.38 - 1.48 (m, 2 H), 1.03 - 1.15 (m, 3 H), 0.86 - 0.96 (m, 6 H)

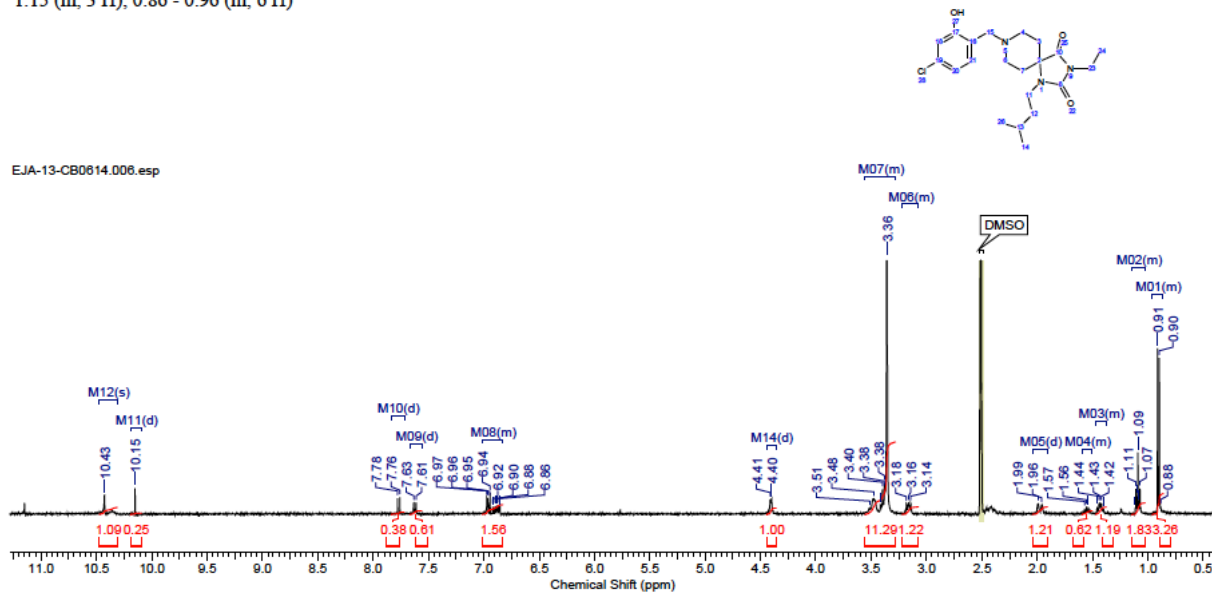

EJA-13-CB0614.006.esp

# <sup>1</sup>H NMR spectra for compound 12i

|                                                                        |                                                                                                                     |                        |                                       |
|------------------------------------------------------------------------|---------------------------------------------------------------------------------------------------------------------|------------------------|---------------------------------------|
| Formula C <sub>21</sub> H <sub>26</sub> N <sub>10</sub> O <sub>5</sub> |                                                                                                                     | FW 407.9342            |                                       |
| Acquisition Time (sec)                                                 | 4.0894                                                                                                              | Comment                | 5 mm PABBO BB-1H/D Z-GRD Z863001/0012 |
| Date Stamp                                                             | 11 Sep 2013 15:20:16                                                                                                | Date                   | 11 Sep 2013 15:20:16                  |
| File Name                                                              | C:\Documents and Settings\tkrennin\My Documents\Dropbox\Research Folders\raw NMR data - 9.10.13\TMk-13-CD0230\1.fid |                        |                                       |
| Frequency (MHz)                                                        | 400.13                                                                                                              | Nucleus                | <sup>1</sup> H                        |
| Original Points Count                                                  | 32768                                                                                                               | Number of Transients   | 16                                    |
| Receiver Gain                                                          | 812.00                                                                                                              | Origin                 | spect                                 |
| Spectrum Type                                                          | STANDARD                                                                                                            | Points Count           | 32768                                 |
|                                                                        |                                                                                                                     | Pulse Sequence         | zg30                                  |
|                                                                        |                                                                                                                     | Solvent                | DMSO-d6                               |
|                                                                        |                                                                                                                     | Spectrum Offset (Hz)   | 2486.7119                             |
|                                                                        |                                                                                                                     | SW(cyclical) (Hz)      | 8012.82                               |
|                                                                        |                                                                                                                     | Sweep Width (Hz)       | 8012.58                               |
|                                                                        |                                                                                                                     | Temperature (degree C) | 25.000                                |

<sup>1</sup>H NMR (400 MHz, DMSO-*d*<sub>6</sub>) δ ppm 9.98 - 10.23 (m, 1 H), 7.55 (d, *J*=7.8 Hz, 2 H), 7.02 (t, *J*=7.8 Hz, 1 H), 4.43 (br. s., 2 H), 3.49 (br. s., 4 H), 3.42 - 3.46 (m, 2 H), 3.13 - 3.30 (m, 2 H), 2.50 (d, *J*=1.7 Hz, 2 H), 2.00 (d, *J*=14.2 Hz, 2 H), 1.60 (s, 1 H), 1.40 - 1.53 (m, 2 H), 1.05 - 1.18 (m, 3 H), 0.90 - 1.02 (m, 6 H)

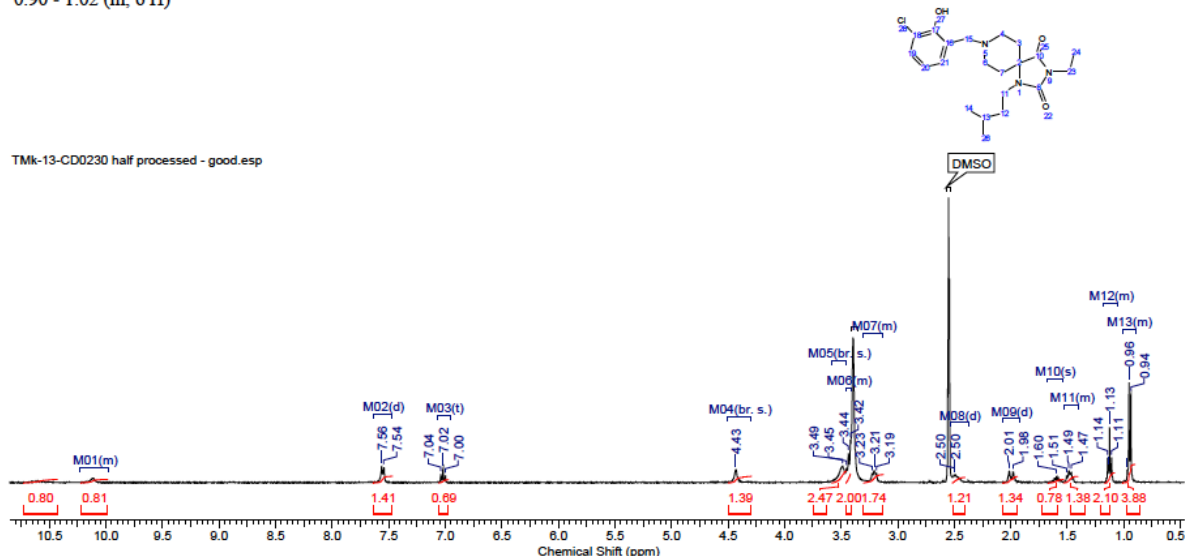

TMk-13-CD0230 half processed - good.esp

# <sup>1</sup>H NMR spectra for compound 12j

| Formula C <sub>11</sub> H <sub>10</sub> Cl <sub>2</sub> N <sub>2</sub> O <sub>2</sub>                                         |                      | FW 442.3793            |                                       |
|-------------------------------------------------------------------------------------------------------------------------------|----------------------|------------------------|---------------------------------------|
| Acquisition Time (sec)                                                                                                        | 4.0894               | Comment                | 5 mm PABBO BB-1H/D Z-GRD Z863001/0012 |
| Date Stamp                                                                                                                    | 11 Sep 2013 16:02:56 | Date                   | 11 Sep 2013 16:02:56                  |
| File Name C:\DOCUMENTS AND SETTINGS\TKRENNIN\MY DOCUMENTS\DROPBOX\RESEARCH FOLDERS\RAW NMR DATA - 9.10.13\EJA-13-CB0617\1\FID |                      |                        |                                       |
| Frequency (MHz)                                                                                                               | 400.13               | Nucleus                | <sup>1</sup> H                        |
| Original Points Count                                                                                                         | 32768                | Number of Transients   | 16                                    |
| Receiver Gain                                                                                                                 | 812.00               | Points Count           | 32768                                 |
| Spectrum Type                                                                                                                 | STANDARD             | Solvent                | DMSO-d6                               |
|                                                                                                                               |                      | SW(cyclical) (Hz)      | 8012.82                               |
|                                                                                                                               |                      | Temperature (degree C) | 25.000                                |
|                                                                                                                               |                      | Spectrum Offset (Hz)   | 2470.9668                             |

<sup>1</sup>H NMR (400 MHz, DMSO-*d*<sub>6</sub>) δ ppm 7.42 (d, *J*=2.4 Hz, 1 H), 7.23 (s, 1 H), 3.85 (br. s., 1 H), 3.39 (q, *J*=7.1 Hz, 4 H), 3.15 - 3.30 (m, 2 H), 2.85 (br. s., 2 H), 1.94 - 2.13 (m, 4 H), 1.72 (d, *J*=13.2 Hz, 2 H), 1.52 - 1.64 (m, 1 H), 1.36 - 1.49 (m, 2 H), 1.08 (t, *J*=7.2 Hz, 3 H), 0.92 (d, *J*=6.6 Hz, 6 H)

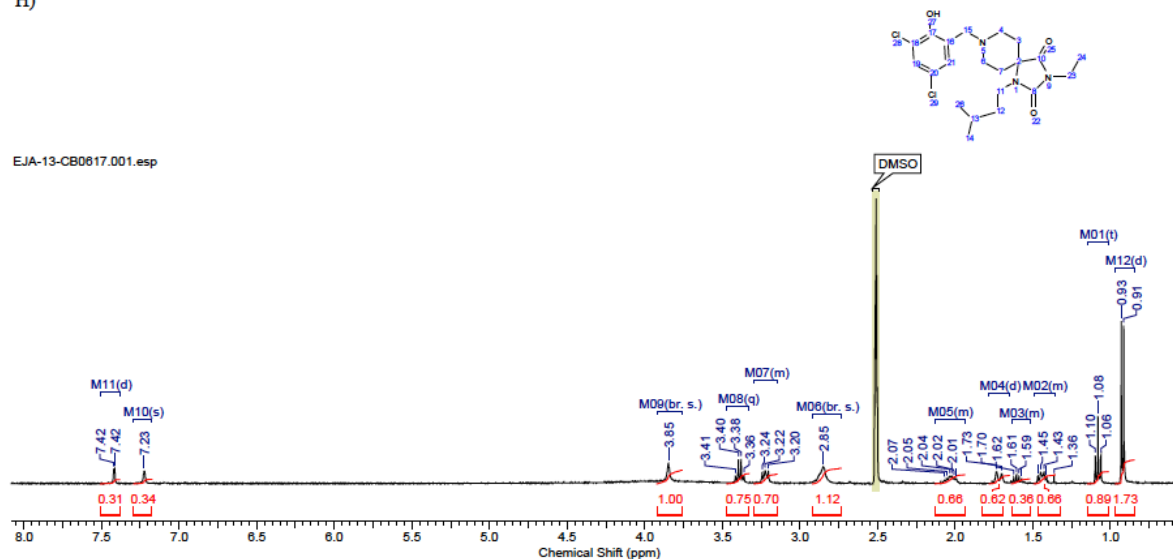

# <sup>1</sup>H NMR spectra for compound 12k

| Formula C <sub>11</sub> H <sub>10</sub> Cl <sub>2</sub> N <sub>2</sub> O <sub>2</sub>                                         |                      | FW 442.3793            |                                       |
|-------------------------------------------------------------------------------------------------------------------------------|----------------------|------------------------|---------------------------------------|
| Acquisition Time (sec)                                                                                                        | 4.0894               | Comment                | 5 mm PABBO BB-1H/D Z-GRD Z863001/0012 |
| Date Stamp                                                                                                                    | 11 Sep 2013 15:58:40 | Date                   | 11 Sep 2013 15:58:40                  |
| File Name C:\DOCUMENTS AND SETTINGS\TKRENNIN\MY DOCUMENTS\DROPBOX\RESEARCH FOLDERS\RAW NMR DATA - 9.10.13\EJA-13-CB0616\1\FID |                      |                        |                                       |
| Frequency (MHz)                                                                                                               | 400.13               | Nucleus                | <sup>1</sup> H                        |
| Original Points Count                                                                                                         | 32768                | Number of Transients   | 16                                    |
| Receiver Gain                                                                                                                 | 724.00               | Points Count           | 32768                                 |
| Spectrum Type                                                                                                                 | STANDARD             | Solvent                | DMSO-d6                               |
|                                                                                                                               |                      | SW(cyclical) (Hz)      | 8012.58                               |
|                                                                                                                               |                      | Temperature (degree C) | 25.000                                |
|                                                                                                                               |                      | Spectrum Offset (Hz)   | 2470.9668                             |

<sup>1</sup>H NMR (400 MHz, DMSO-*d*<sub>6</sub>) δ ppm 7.42 (s, 1 H), 7.00 (s, 1 H), 3.66 (br. s., 1 H), 3.38 (q, *J*=7.2 Hz, 4 H), 3.09 - 3.25 (m, 2 H), 2.78 (br. s., 4 H), 1.89 - 2.08 (m, 2 H), 1.69 (br. s., 2 H), 1.53 - 1.65 (m, 1 H), 1.34 - 1.51 (m, 2 H), 1.07 (t, *J*=7.2 Hz, 3 H), 0.91 (d, *J*=6.6 Hz, 6 H)

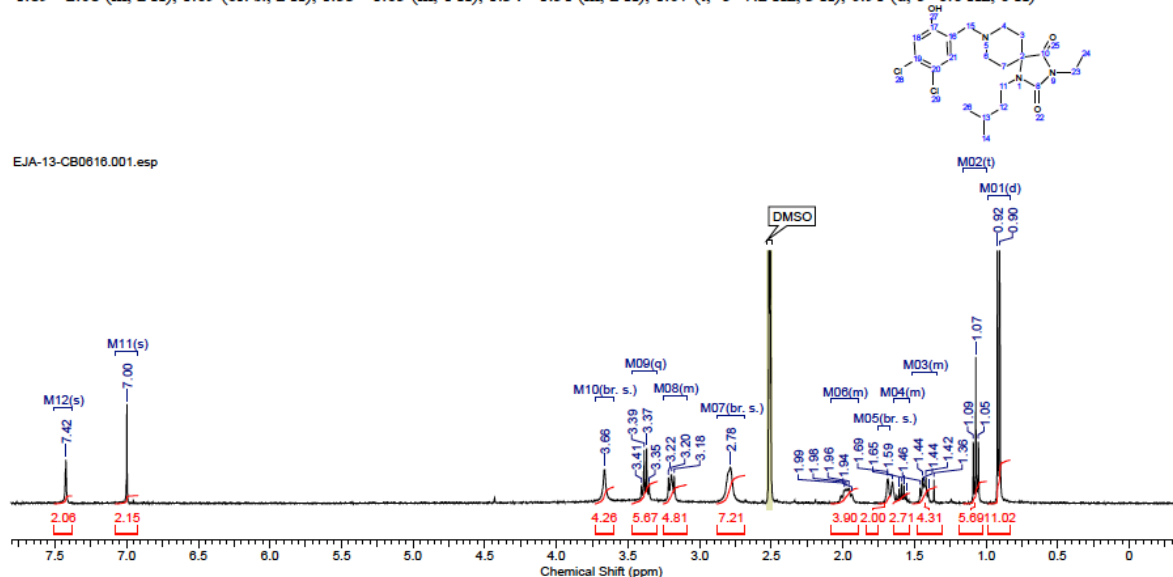



# <sup>1</sup>H NMR spectra for compound 12l

|                                                                         |                      |                        |                                              |
|-------------------------------------------------------------------------|----------------------|------------------------|----------------------------------------------|
| Formula C <sub>14</sub> H <sub>14</sub> ClN <sub>2</sub> O <sub>2</sub> |                      | FW 442.3793            |                                              |
| Acquisition Time (sec)                                                  | 4.0894               | Comment                | 5 mm PABBO BB-1H/D Z-GRD Z863001/0012        |
| Date Stamp                                                              | 22 Dec 2014 13:48:16 | File Name              | C:\Users\leander39\Desktop\MS-14-CQ46834\fid |
| Frequency (MHz)                                                         | 400.13               | Nucleus                | 1H                                           |
| Original Points Count                                                   | 32768                | Number of Transients   | 16                                           |
| Receiver Gain                                                           | 724.00               | Points Count           | 32768                                        |
| Spectrum Type                                                           | STANDARD             | Sweep Width (Hz)       | 8012.58                                      |
|                                                                         |                      | Temperature (degree C) | 25.000                                       |
|                                                                         |                      | Solvent                | DMSO-d6                                      |
|                                                                         |                      | Spectrum Offset (Hz)   | 2467.6448                                    |
|                                                                         |                      | Pulse Sequence         | zg30                                         |
|                                                                         |                      | Origin                 | spect                                        |

<sup>1</sup>H NMR (400 MHz, DMSO-d<sub>6</sub>) δ ppm 0.82 - 0.96 (m, 6 H) 1.02 - 1.14 (m, 3 H) 1.36 - 1.47 (m, 2 H) 1.50 - 1.62 (m, 1 H) 1.98 (d, J=14.43 Hz, 2 H) 2.22 - 2.38 (m, 2 H) 3.12 (br. s., 4 H) 3.40 (q, J=7.09 Hz, 2 H) 3.48 - 3.71 (m, 4 H) 4.46 (br. s., 1 H) 7.02 (d, J=9.05 Hz, 1 H) 7.61 (d, J=9.05 Hz, 1 H)

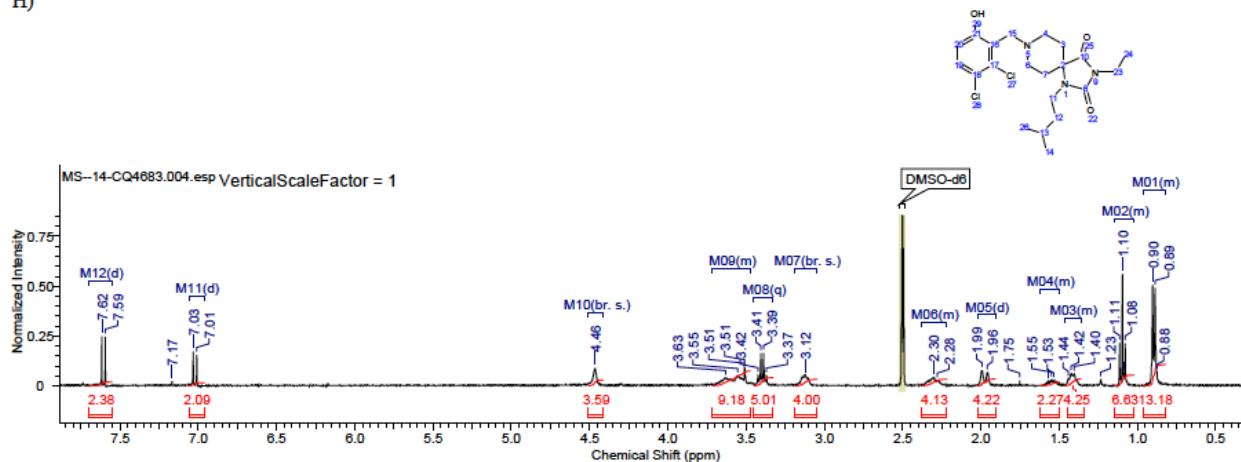

# <sup>1</sup>H NMR spectra for compound 12m

052200

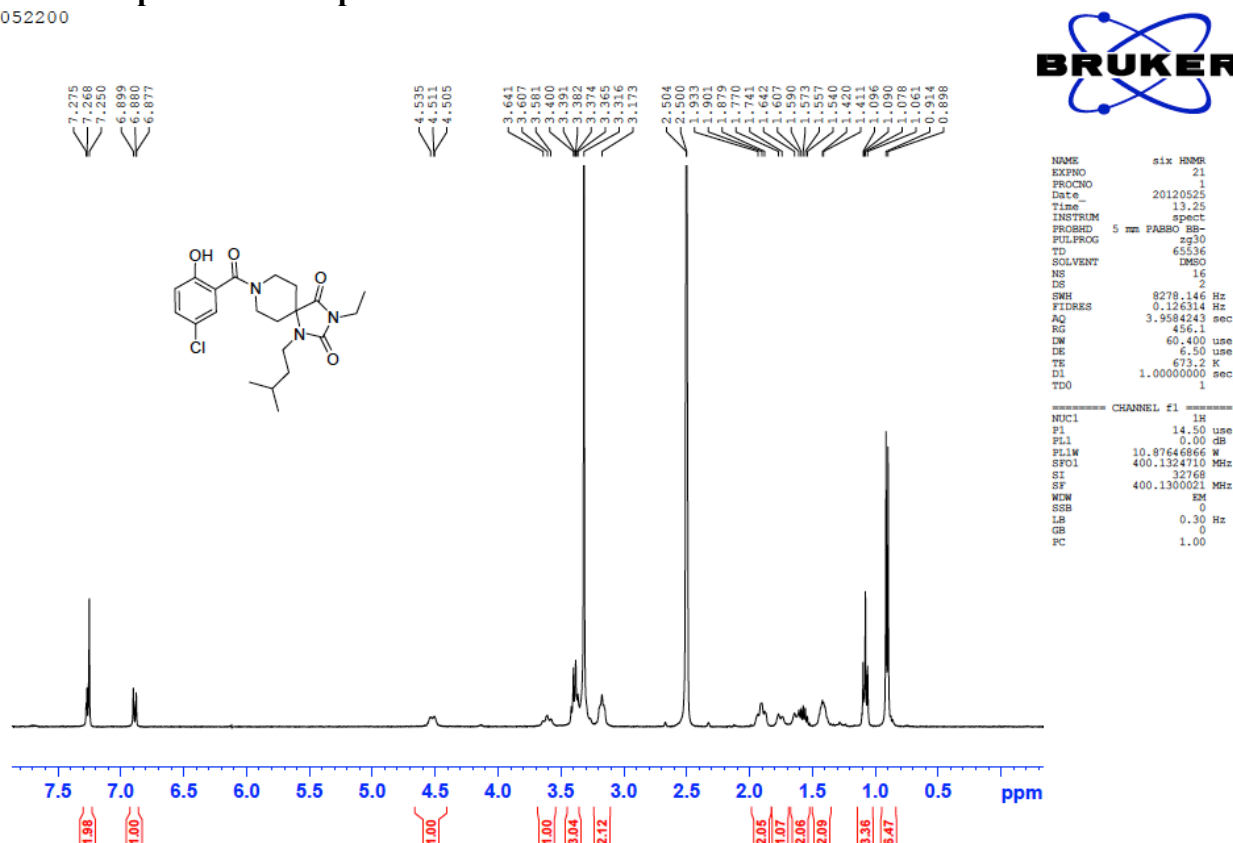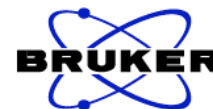

```

NAME          six 1HMR
EXPNO         21
PROCNO        1
Date_         20120525
Time          13.25
INSTRUM       spect
PROBHD        5 mm PABBO BB-
PULPROG       zg30
TD             65536
SOLVENT       DMSO
NS             16
DS             2
SWH            8278.146 Hz
FIDRES        0.126314 Hz
AQ             3.9584243 sec
RG             456.1
DW             60.400 usec
DE             6.50 usec
TE             673.2 K
D1             1.00000000 sec
TDO           1
===== CHANNEL f1 =====
NUC1           1H
P1            14.50 usec
PL1           0.00 dB
PL1W          10.87646866 W
SFO1          400.1324110 MHz
SI            32768
SF            400.1300021 MHz
WDW           EM
SSB           0
LB            0.30 Hz
GB            0
PC            1.00
    
```

# <sup>1</sup>H NMR spectra for compound 12n

| Formula                | C <sub>14</sub> H <sub>26</sub> N <sub>2</sub> O <sub>2</sub> | FW                     | 267.3672                                                          |
|------------------------|---------------------------------------------------------------|------------------------|-------------------------------------------------------------------|
| Acquisition Time (sec) | 1.4680                                                        | Comment                | SAM-16-000B/DMSO-d6/03-30-12                                      |
| Date Stamp             | 29 Mar 2012 15:35:12                                          | File Name              | C:\Users\Sarah\Documents\Data\smc\ntt\exp\SAM-16-009\NMR data\fid |
| Frequency (MHz)        | 400.13                                                        | Nucleus                | 1H                                                                |
| Original Points Count  | 16384                                                         | Number of Transients   | 32                                                                |
| Receiver Gain          | 322.00                                                        | Owner                  | nmr                                                               |
| Spectrum Type          | STANDARD                                                      | Points Count           | 131072                                                            |
|                        |                                                               | SW(cyclical) (Hz)      | 11160.71                                                          |
|                        |                                                               | Solvent                | DMSO-d6                                                           |
|                        |                                                               | Temperature (degree C) | 25.000                                                            |
|                        |                                                               | Pulse Sequence         | zg30                                                              |
|                        |                                                               | Spectrum Offset (Hz)   | 3332.2715                                                         |
|                        |                                                               | Sweep Width (Hz)       | 11160.63                                                          |

<sup>1</sup>H NMR (400 MHz, DMSO-d<sub>6</sub>) δ ppm 9.26 (br. s., 1 H), 3.39 (q, J=7.2 Hz, 2 H), 3.32 (d, J=6.9 Hz, 4 H), 3.18 (t, J=1.0 Hz, 2 H), 2.36 (dt, J=14.1, 9.2 Hz, 2 H), 1.86 (d, J=14.4 Hz, 2 H), 1.55 (spt, J=1.0 Hz, 1 H), 1.45 (q, J=1.0 Hz, 2 H), 1.08 (t, J=1.0 Hz, 3 H), 0.91 (d, J=1.0 Hz, 6 H)

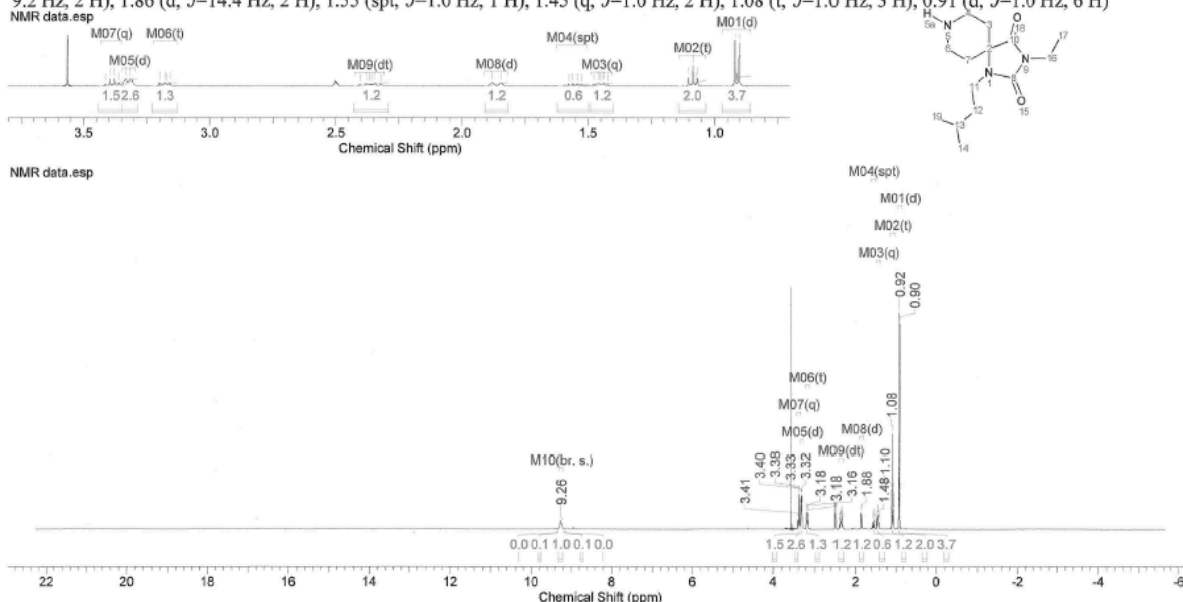

# <sup>1</sup>H NMR spectra for compound 12o

| Formula                | C <sub>14</sub> H <sub>24</sub> N <sub>2</sub> O <sub>2</sub> | FW                     | 325.4463                                                      |
|------------------------|---------------------------------------------------------------|------------------------|---------------------------------------------------------------|
| Acquisition Time (sec) | 3.9846                                                        | Comment                | SAM-12-BI5600 HCl salt                                        |
| Date Stamp             | 24 May 2012 13:03:44                                          | File Name              | C:\Users\Sarah\Documents\Data\smc\ntt\exp\SAM-12-BI5600\1\fid |
| Frequency (MHz)        | 400.13                                                        | Nucleus                | 1H                                                            |
| Original Points Count  | 32768                                                         | Number of Transients   | 16                                                            |
| Receiver Gain          | 512.00                                                        | Owner                  | smc\ntt                                                       |
| Spectrum Type          | STANDARD                                                      | Points Count           | 131072                                                        |
|                        |                                                               | SW(cyclical) (Hz)      | 8223.68                                                       |
|                        |                                                               | Solvent                | DMSO-d6                                                       |
|                        |                                                               | Temperature (degree C) | 25.000                                                        |
|                        |                                                               | Pulse Sequence         | zg30                                                          |
|                        |                                                               | Spectrum Offset (Hz)   | 2137.2366                                                     |
|                        |                                                               | Sweep Width (Hz)       | 8223.62                                                       |

<sup>1</sup>H NMR (400 MHz, DMSO-d<sub>6</sub>) δ ppm 2.74 (s, 1 H), 2.65 (t, J=1.0 Hz, 2 H), 2.52 - 2.60 (m, 4 H), 2.43 - 2.49 (m, 2 H), 2.36 (t, J=1.0 Hz, 2 H), 1.67 (dt, J=3.7, 1.8 Hz, 4 H), 1.09 - 1.18 (m, 2 H), 0.98 - 1.08 (m, 2 H), 0.74 (spt, J=1.0 Hz, 1 H), 0.63 (q, J=1.0 Hz, 2 H), 0.27 (t, J=1.0 Hz, 3 H), 0.09 (d, J=6.6 Hz, 6 H)

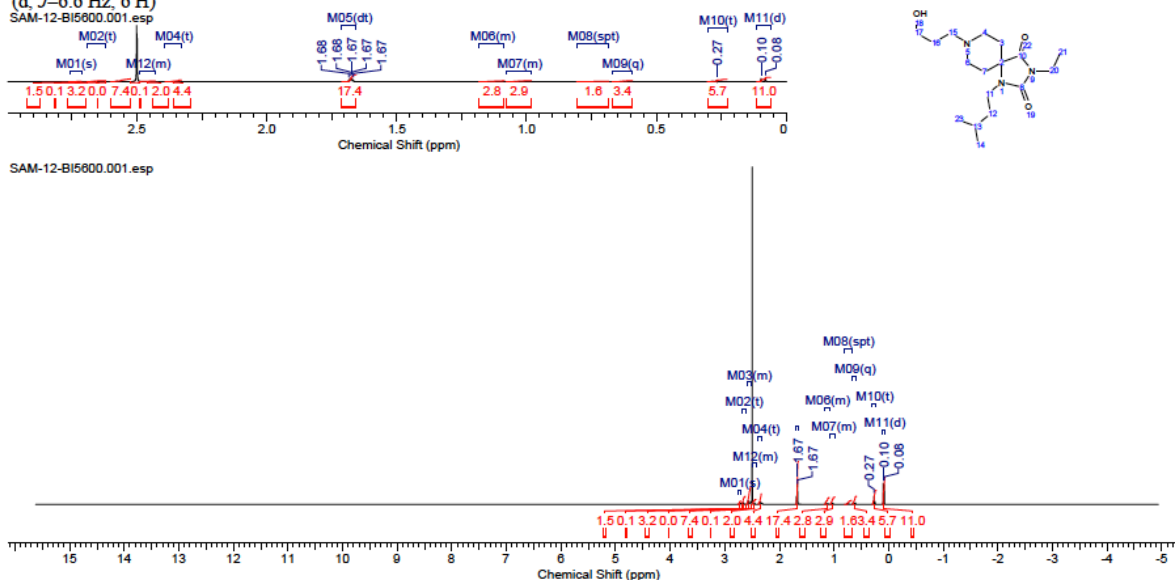

# <sup>1</sup>H NMR spectra for compound 12p

|         |                                                               |    |          |
|---------|---------------------------------------------------------------|----|----------|
| Formula | C <sub>28</sub> H <sub>31</sub> N <sub>5</sub> O <sub>2</sub> | FW | 373.4924 |
|---------|---------------------------------------------------------------|----|----------|

|                        |                      |                   |                                                                |                        |                      |
|------------------------|----------------------|-------------------|----------------------------------------------------------------|------------------------|----------------------|
| Acquisition Time (sec) | 3.9846               | Comment           | SAM-12-BI5802 HCl salt                                         | Date                   | 24 May 2012 13:20:48 |
| Date Stamp             | 24 May 2012 13:20:48 | File Name         | C:\Users\Sarah\Documents\Data\smcnitt\expl\SAM-12-BI5802\1\fid |                        |                      |
| Frequency (MHz)        | 400.13               | Nucleus           | 1H                                                             | Number of Transients   | 16                   |
| Original Points Count  | 32768                | Owner             | smcnitt                                                        | Points Count           | 131072               |
| Receiver Gain          | 512.00               | SW(cyclical) (Hz) | 8223.68                                                        | Solvent                | DMSO-d6              |
| Spectrum Type          | STANDARD             | Sweep Width (Hz)  | 8223.62                                                        | Temperature (degree C) | 25.000               |
|                        |                      |                   |                                                                | Pulse Sequence         | zg30                 |
|                        |                      |                   |                                                                | Spectrum Offset (Hz)   | 2489.4541            |

<sup>1</sup>H NMR (400 MHz, DMSO-d<sub>6</sub>) δ ppm 8.37 (d, *J*=7.1 Hz, 1 H), 8.12 (dd, *J*=6.2, 1.6 Hz, 1 H), 6.98 (dd, *J*=7.4, 6.2 Hz, 1 H), 4.45 (br. s., 2 H), 3.52 (br. s., 4 H), 3.40 (q, *J*=7.2 Hz, 2 H), 3.21 (t, *J*=1.0 Hz, 2 H), 2.62 (br. s., 2 H), 2.57 - 2.61 (m, 2 H), 1.95 (d, *J*=13.7 Hz, 2 H), 1.55 (spt, *J*=1.0 Hz, 1 H), 1.44 (q, *J*=1.0 Hz, 2 H), 1.10 (t, *J*=7.2 Hz, 3 H), 0.90 (d, *J*=6.6 Hz, 6 H)

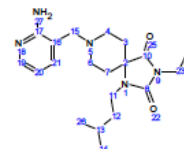

SAM-12-BI5802 nmr analysis.esp

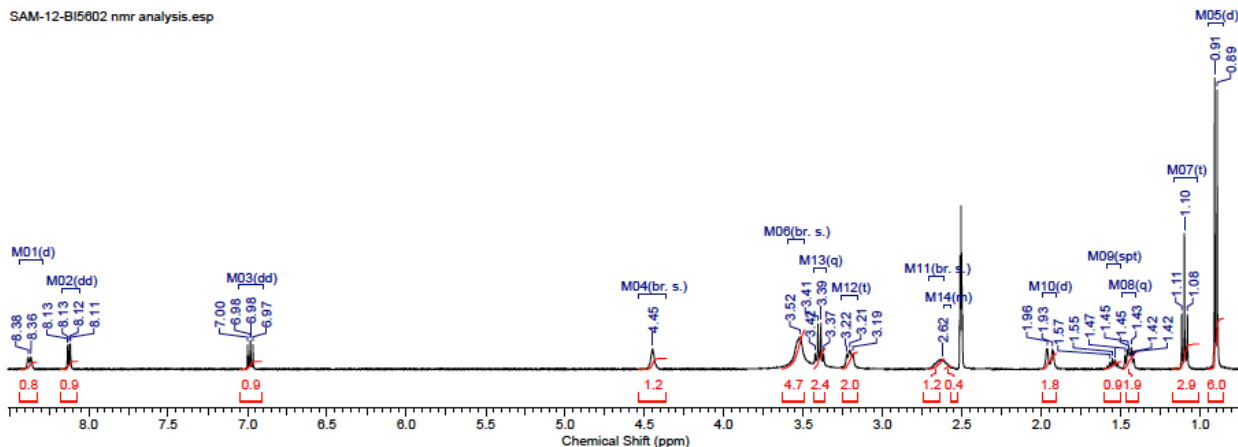

# <sup>1</sup>H NMR spectra for compound 12q

|         |                                                               |    |          |
|---------|---------------------------------------------------------------|----|----------|
| Formula | C <sub>28</sub> H <sub>35</sub> N <sub>5</sub> O <sub>2</sub> | FW | 407.9375 |
|---------|---------------------------------------------------------------|----|----------|

|                        |                      |                   |                                                |                        |                      |
|------------------------|----------------------|-------------------|------------------------------------------------|------------------------|----------------------|
| Acquisition Time (sec) | 4.0894               | Comment           | 5 mm PABBO BB-1HD Z-GRD Z863001/0012           | Date                   | 12 Dec 2014 10:32:00 |
| Date Stamp             | 12 Dec 2014 10:32:00 | File Name         | C:\Users\leander39\Desktop\EJA-14-CB0661\2\fid |                        |                      |
| Frequency (MHz)        | 400.13               | Nucleus           | 1H                                             | Number of Transients   | 16                   |
| Original Points Count  | 32768                | Owner             | nmr                                            | Points Count           | 32768                |
| Receiver Gain          | 812.00               | SW(cyclical) (Hz) | 8012.82                                        | Solvent                | DMSO-d6              |
| Spectrum Type          | STANDARD             | Sweep Width (Hz)  | 8012.58                                        | Temperature (degree C) | 25.000               |
|                        |                      |                   |                                                | Pulse Sequence         | zg30                 |
|                        |                      |                   |                                                | Spectrum Offset (Hz)   | 2467.6448            |

<sup>1</sup>H NMR (400 MHz, DMSO-d<sub>6</sub>) δ ppm 0.90 (d, *J*=6.60 Hz, 6 H) 1.06 (t, *J*=7.09 Hz, 3 H) 1.37 - 1.48 (m, 1 H) 1.51 - 1.68 (m, 2 H) 1.87 - 2.00 (m, 2 H) 2.63 - 2.75 (m, 4 H) 3.10 - 3.21 (m, 2 H) 3.27 - 3.46 (m, 6 H) 6.20 (s, 2 H) 7.44 (d, *J*=2.69 Hz, 1 H) 7.87 (d, *J*=2.69 Hz, 1 H)

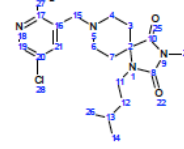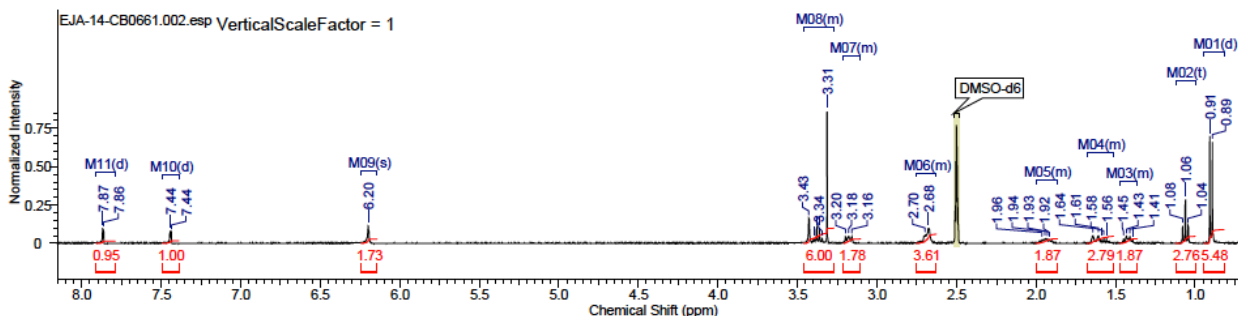

# <sup>1</sup>H NMR spectra for compound 12r

| Formula C <sub>12</sub> H <sub>10</sub> N <sub>4</sub> O |                      | FW 372.4613       |                                                              |                        |                      |
|----------------------------------------------------------|----------------------|-------------------|--------------------------------------------------------------|------------------------|----------------------|
| Acquisition Time (sec)                                   | 3.9846               | Comment           | SAM-12-BI5603 final product                                  | Date                   | 22 Jun 2012 11:23:28 |
| Date Stamp                                               | 22 Jun 2012 11:23:28 | File Name         | C:\Users\Sarah\Documents\Data\smcnitt\exp\SAM-12-BI56031.fid | Origin                 | spect                |
| Frequency (MHz)                                          | 400.13               | Nucleus           | <sup>1</sup> H                                               | Number of Transients   | 16                   |
| Original Points Count                                    | 32768                | Owner             | smcnitt                                                      | Points Count           | 131072               |
| Receiver Gain                                            | 575.00               | SW(cyclical) (Hz) | 8223.68                                                      | Solvent                | DMSO-d <sub>6</sub>  |
| Spectrum Type                                            | STANDARD             | Sweep Width (Hz)  | 8223.62                                                      | Temperature (degree C) | 25.000               |

<sup>1</sup>H NMR (400 MHz, DMSO-*d*<sub>6</sub>) δ ppm 8.59 (dq, *J*=1.0 Hz, 1 H), 7.94 (td, *J*=7.7, 1.8 Hz, 1 H), 7.63 (dt, *J*=7.8, 1.1 Hz, 1 H), 7.48 (ddd, *J*=7.6, 4.9, 1.2 Hz, 1 H), 3.34 - 3.44 (m, 4 H), 3.19 (t, *J*=1.0 Hz, 2 H), 2.06 - 2.10 (m, 2 H), 1.96 (dt, *J*=12.5, 6.6 Hz, 2 H), 1.77 - 1.84 (m, 1 H), 1.62 - 1.68 (m, 1 H), 1.52 - 1.62 (m, 1 H), 1.42 (d, *J*=3.2 Hz, 2 H), 1.09 (t, *J*=1.0 Hz, 3 H), 0.90 (d, *J*=6.6 Hz, 6 H)

SAM-12-BI5603 NMR analysis.esp

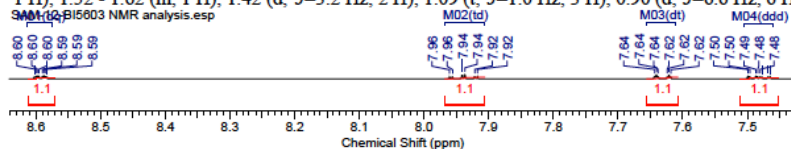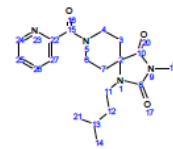

SAM-12-BI5603 NMR analysis.esp

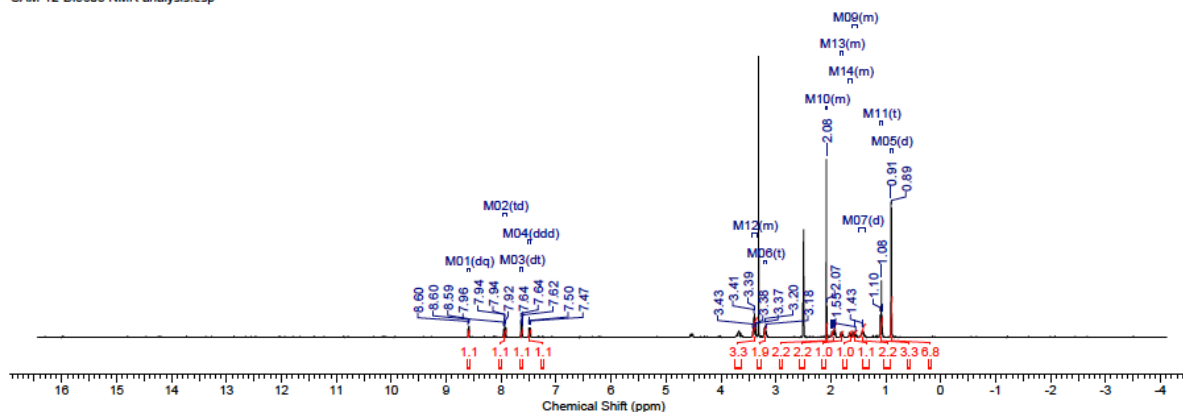

# <sup>1</sup>H NMR spectra for compound 12s

| Formula C <sub>12</sub> H <sub>10</sub> N <sub>4</sub> O |                      | FW 408.5365       |                                                              |                        |                      |
|----------------------------------------------------------|----------------------|-------------------|--------------------------------------------------------------|------------------------|----------------------|
| Acquisition Time (sec)                                   | 3.9846               | Comment           | SAM-12-BI5604 HCl salt                                       | Date                   | 22 Jun 2012 11:36:16 |
| Date Stamp                                               | 22 Jun 2012 11:36:16 | File Name         | C:\Users\Sarah\Documents\Data\smcnitt\exp\SAM-12-BI56041.fid | Origin                 | spect                |
| Frequency (MHz)                                          | 400.13               | Nucleus           | <sup>1</sup> H                                               | Number of Transients   | 16                   |
| Original Points Count                                    | 32768                | Owner             | smcnitt                                                      | Points Count           | 131072               |
| Receiver Gain                                            | 575.00               | SW(cyclical) (Hz) | 8223.68                                                      | Solvent                | DMSO-d <sub>6</sub>  |
| Spectrum Type                                            | STANDARD             | Sweep Width (Hz)  | 8223.62                                                      | Temperature (degree C) | 25.000               |

<sup>1</sup>H NMR (400 MHz, DMSO-*d*<sub>6</sub>) δ ppm 9.06 (dd, *J*=4.1, 1.6 Hz, 1 H), 8.52 (dd, *J*=8.3, 1.7 Hz, 1 H), 8.21 (dd, *J*=7.1, 1.3 Hz, 1 H), 8.17 (dd, *J*=8.3, 1.3 Hz, 1 H), 7.75 (dd, *J*=8.2, 7.2 Hz, 1 H), 7.68 (dd, *J*=8.3, 4.2 Hz, 1 H), 5.01 (br. s., 2 H), 3.43 - 3.61 (m, 4 H), 3.32 - 3.42 (m, 2 H), 3.17 (t, *J*=1.0 Hz, 2 H), 2.08 (s, 2 H), 1.92 (d, *J*=14.7 Hz, 2 H), 1.48 - 1.59 (m, 1 H), 1.41 (d, *J*=7.9 Hz, 2 H), 1.04 - 1.11 (m, 3 H), 0.88 (d, *J*=6.4 Hz, 6 H)

SAM-12-BI5604 NMR analysis.esp

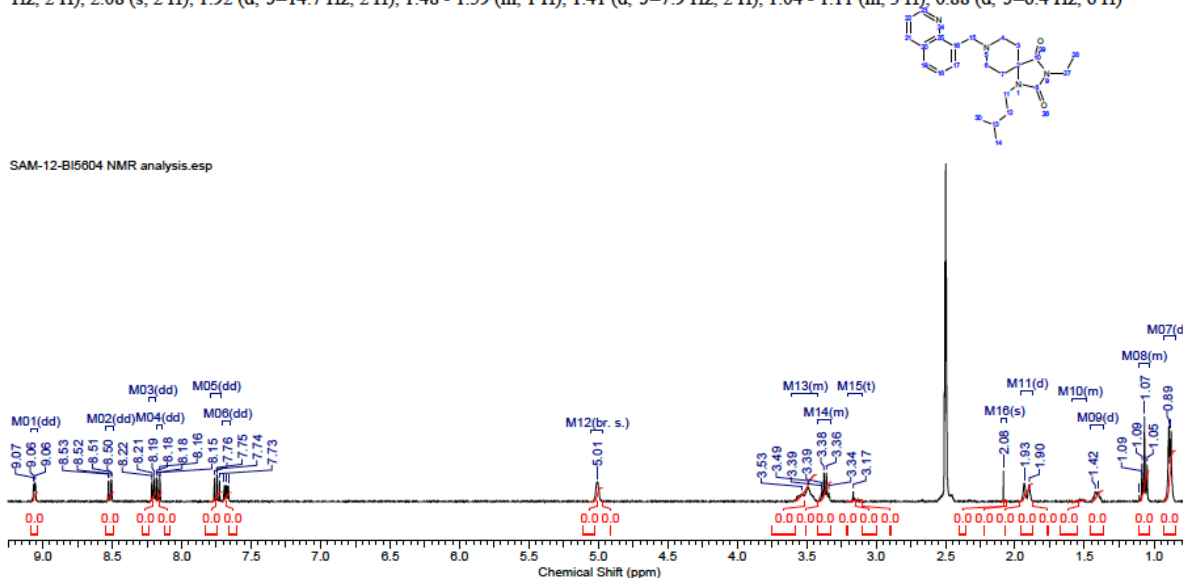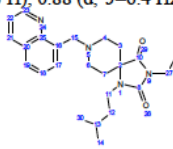

# <sup>1</sup>H NMR spectra for compound 12t

Formula C<sub>12</sub>H<sub>12</sub>N<sub>4</sub>O<sub>4</sub> FW 358.4778

|                        |                      |                   |                                                               |                        |                      |
|------------------------|----------------------|-------------------|---------------------------------------------------------------|------------------------|----------------------|
| Acquisition Time (sec) | 3.9846               | Comment           | SAM-12-BI5605B HCl salt                                       | Date                   | 22 Jun 2012 11:51:12 |
| Date Stamp             | 22 Jun 2012 11:51:12 | File Name         | C:\Users\Sarah\Documents\Data\smn\12\exp\SAM-12-BI5605B\1.fid | Origin                 | spect                |
| Frequency (MHz)        | 400.13               | Nucleus           | 1H                                                            | Number of Transients   | 16                   |
| Original Points Count  | 32768                | Owner             | smn\12                                                        | Points Count           | 131072               |
| Receiver Gain          | 575.00               | SW(cyclical) (Hz) | 8223.68                                                       | Solvent                | DMSO-d6              |
| Spectrum Type          | STANDARD             | Sweep Width (Hz)  | 8223.62                                                       | Temperature (degree C) | 25.000               |

<sup>1</sup>H NMR (400 MHz, DMSO-d<sub>6</sub>) δ ppm 8.67 - 8.73 (m, 1 H), 7.95 (td, *J*=7.7, 1.8 Hz, 1 H), 7.69 (d, *J*=7.8 Hz, 1 H), 7.51 (ddd, *J*=7.7, 4.9, 1.1 Hz, 1 H), 4.56 (s, 2 H), 3.51 (t, *J*=1.0 Hz, 4 H), 3.38 (q, *J*=7.1 Hz, 2 H), 3.19 (t, *J*=1.0 Hz, 2 H), 2.08 (s, 2 H), 1.95 (d, *J*=14.1 Hz, 2 H), 1.56 (spt, *J*=1.0 Hz, 1 H), 1.45 (q, *J*=1.0 Hz, 2 H), 1.08 (d, *J*=1.0 Hz, 3 H), 0.91 (d, *J*=6.6 Hz, 6 H)

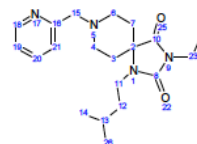

SAM-12-BI5605B NMR analysis.esp

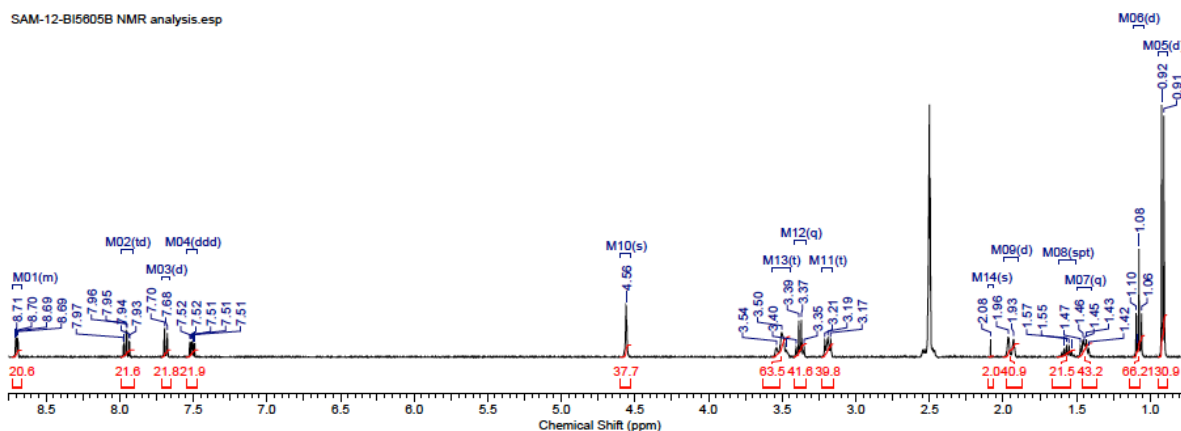

# <sup>1</sup>H NMR spectra for compound 12u

Formula C<sub>12</sub>H<sub>12</sub>N<sub>4</sub>O<sub>4</sub> FW 396.5258

|                        |                      |                        |                                                                                         |                      |                      |
|------------------------|----------------------|------------------------|-----------------------------------------------------------------------------------------|----------------------|----------------------|
| Acquisition Time (sec) | 3.9846               | Comment                | SAM-12-BI5606                                                                           | Date                 | 24 Oct 2012 13:57:04 |
| Date Stamp             | 24 Oct 2012 13:57:04 | File Name              | C:\Users\Sarah\Documents\Data\smn\12\exp\SAM-12-BI5606\SAM-12-BI5606 raw NMR data\1.fid | Frequency (MHz)      | 400.13               |
| Nucleus                | 1H                   | Number of Transients   | 16                                                                                      | Origin               | spect                |
| Owner                  | smn\12               | Points Count           | 131072                                                                                  | Pulse Sequence       | zg30                 |
| SW(cyclical) (Hz)      | 8223.68              | Solvent                | DMSO-d6                                                                                 | Receiver Gain        | 512.00               |
| Sweep Width (Hz)       | 8223.62              | Temperature (degree C) | 25.000                                                                                  | Spectrum Offset (Hz) | 2467.4465            |
|                        |                      |                        |                                                                                         | Spectrum Type        | STANDARD             |

<sup>1</sup>H NMR (400 MHz, DMSO-d<sub>6</sub>) δ ppm 11.66 (br. s., 1 H), 7.68 (d, *J*=1.0 Hz, 1 H), 7.48 (br. t, *J*=1.0, 1.0 Hz, 1 H), 7.38 (d, *J*=1.0 Hz, 1 H), 7.09 (t, *J*=1.0 Hz, 1 H), 6.53 (br. q, *J*=1.0, 1.0, 1.0 Hz, 1 H), 4.68 (br. d, *J*=1.0 Hz, 2 H), 3.52 (br. t, *J*=1.0, 1.0 Hz, 4 H), 3.37 (q, *J*=1.0 Hz, 4 H), 3.16 (br. t, *J*=1.0, 1.0 Hz, 2 H), 1.95 (br. d, *J*=1.0 Hz, 2 H), 1.54 (spt, *J*=1.0 Hz, 1 H), 1.41 (br. q, *J*=1.0, 1.0, 1.0 Hz, 2 H), 1.07 (t, *J*=1.0 Hz, 3 H), 0.90 (d, *J*=1.0 Hz, 6 H)

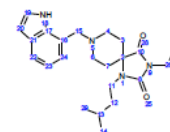

SAM-12-BI5606 raw NMR data.001.esp

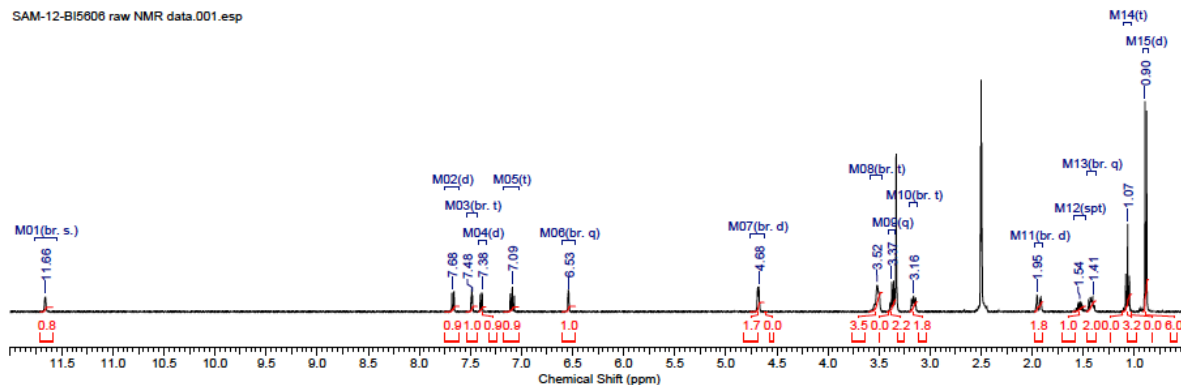

Supplement: NIHMS713405-supplement-Supp.pdf [file NIHMS713405-supplement-Supp.pdf]
